# Supplementary material for: Cellular abundance shapes function in piRNA-guided genome defense
Source: PubMed Central journal article supplement — Genome Res. 2021 Nov;31(11):2058–68. doi: 10.1101/gr.275478.121 (PMC8559710; doi:10.1101/gr.275478.121), 2021-11
Supplement: supp_gr.275478.121_Supplemental_Figures.pdf [file supp_gr.275478.121_Supplemental_Figures.pdf]

1 **Supplemental Material**

2

3 Supplemental Figures 1-7

4

5

6

7

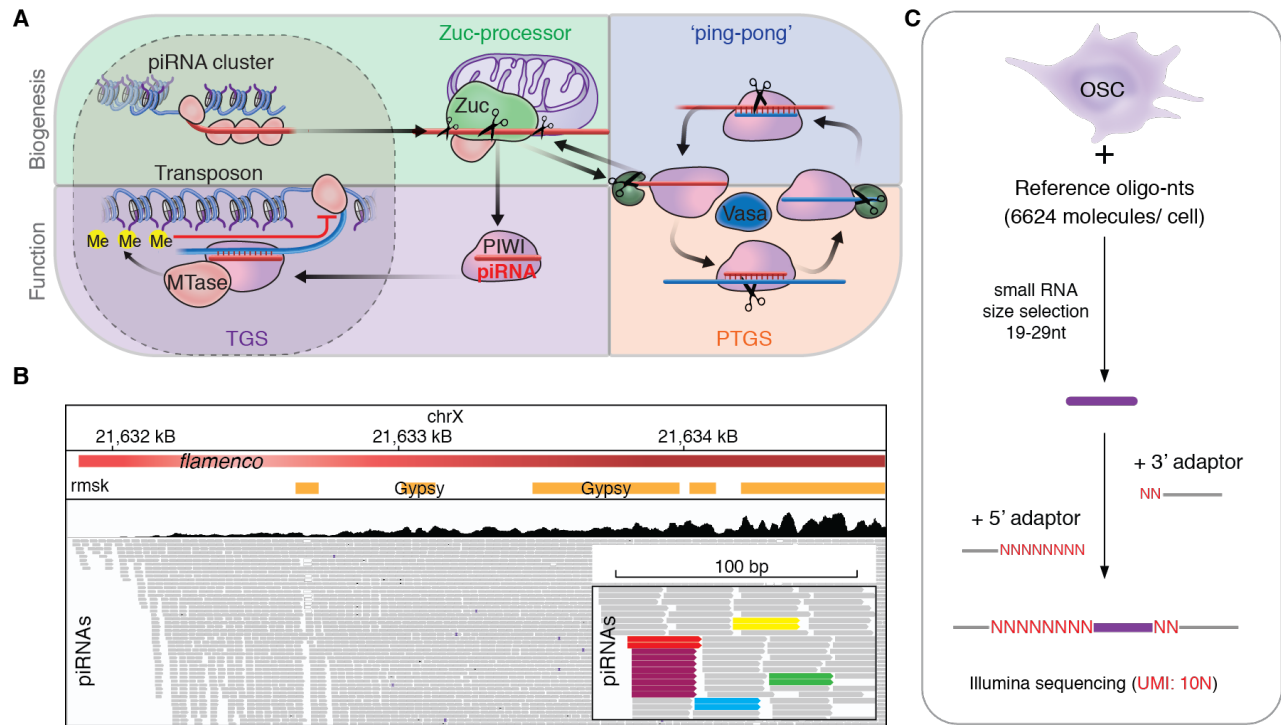

8  
9

10 **Supplemental Fig. S1. Illustration of piRNA biogenesis and sample preparation.** (A) Schematic representation  
 11 of conserved piRNA mechanisms at the example of piRNA silencing in the *Drosophila* ovary. PiRNA generating  
 12 regions, piRNA clusters, produce long precursor transcripts that are sliced by the endonuclease Zucchini (Zuc) and  
 13 loaded into PIWI proteins. The mature PIWI-piRNA complexes (piRISC) target transposon transcripts by  
 14 complementary base-pairing. In the nucleus, piRISC recruits methyltransferases to induce lasting epigenetic  
 15 restriction of transposons (TGS ... transcriptional gene silencing). In the cytoplasm, piRISC cleaves target RNAs  
 16 which results in post-transcriptional silencing (PTGS). Cytoplasmic RNA cleavage can result in generation of  
 17 additional piRNAs in a feed-forward mechanism termed the 'ping-pong' cycle that is coordinated by the helicase  
 18 VASA/DDx4. Ping-pong generated piRNAs can in turn inform piRNA processing by the ZUC-processor complex.  
 19 (B) Genome track of Piwi-piRNAs that originate from *flamenco* (Flam) in OSC. The *flamenco* region contains a high  
 20 density of dysfunc transposon fragments (rmsk ... repeat masker). The single stranded Flam transcript captures most  
 21 transposon insertions in antisense orientation and is processed into millions of diverse piRNA sequences by the  
 22 endonuclease Zucchini (Zuc). PiRNA processing consumes the precursor and results in small RNAs that carry  
 23 information about transposon sequences. (C) Schematic representation of piRNA quantification using spike-in  
 24 calibrator oligonucleotides (reference oligo-nts) and small RNA sequencing in ovarian somatic sheath cell (OSC).  
 25 Total RNA from one million cells was calibrated with a known number of synthetic reference RNA oligonucleotides  
 26 of varying sequence and concentration (see methods). After size selection (19-29nt) and stepwise addition of adapter  
 27 sequences that contained ten unique molecular identifiers (UMI), sequencing data were generated on an Illumina  
 28 NextSeq platform. Our final estimate is based on eight biological replicates (n=8).

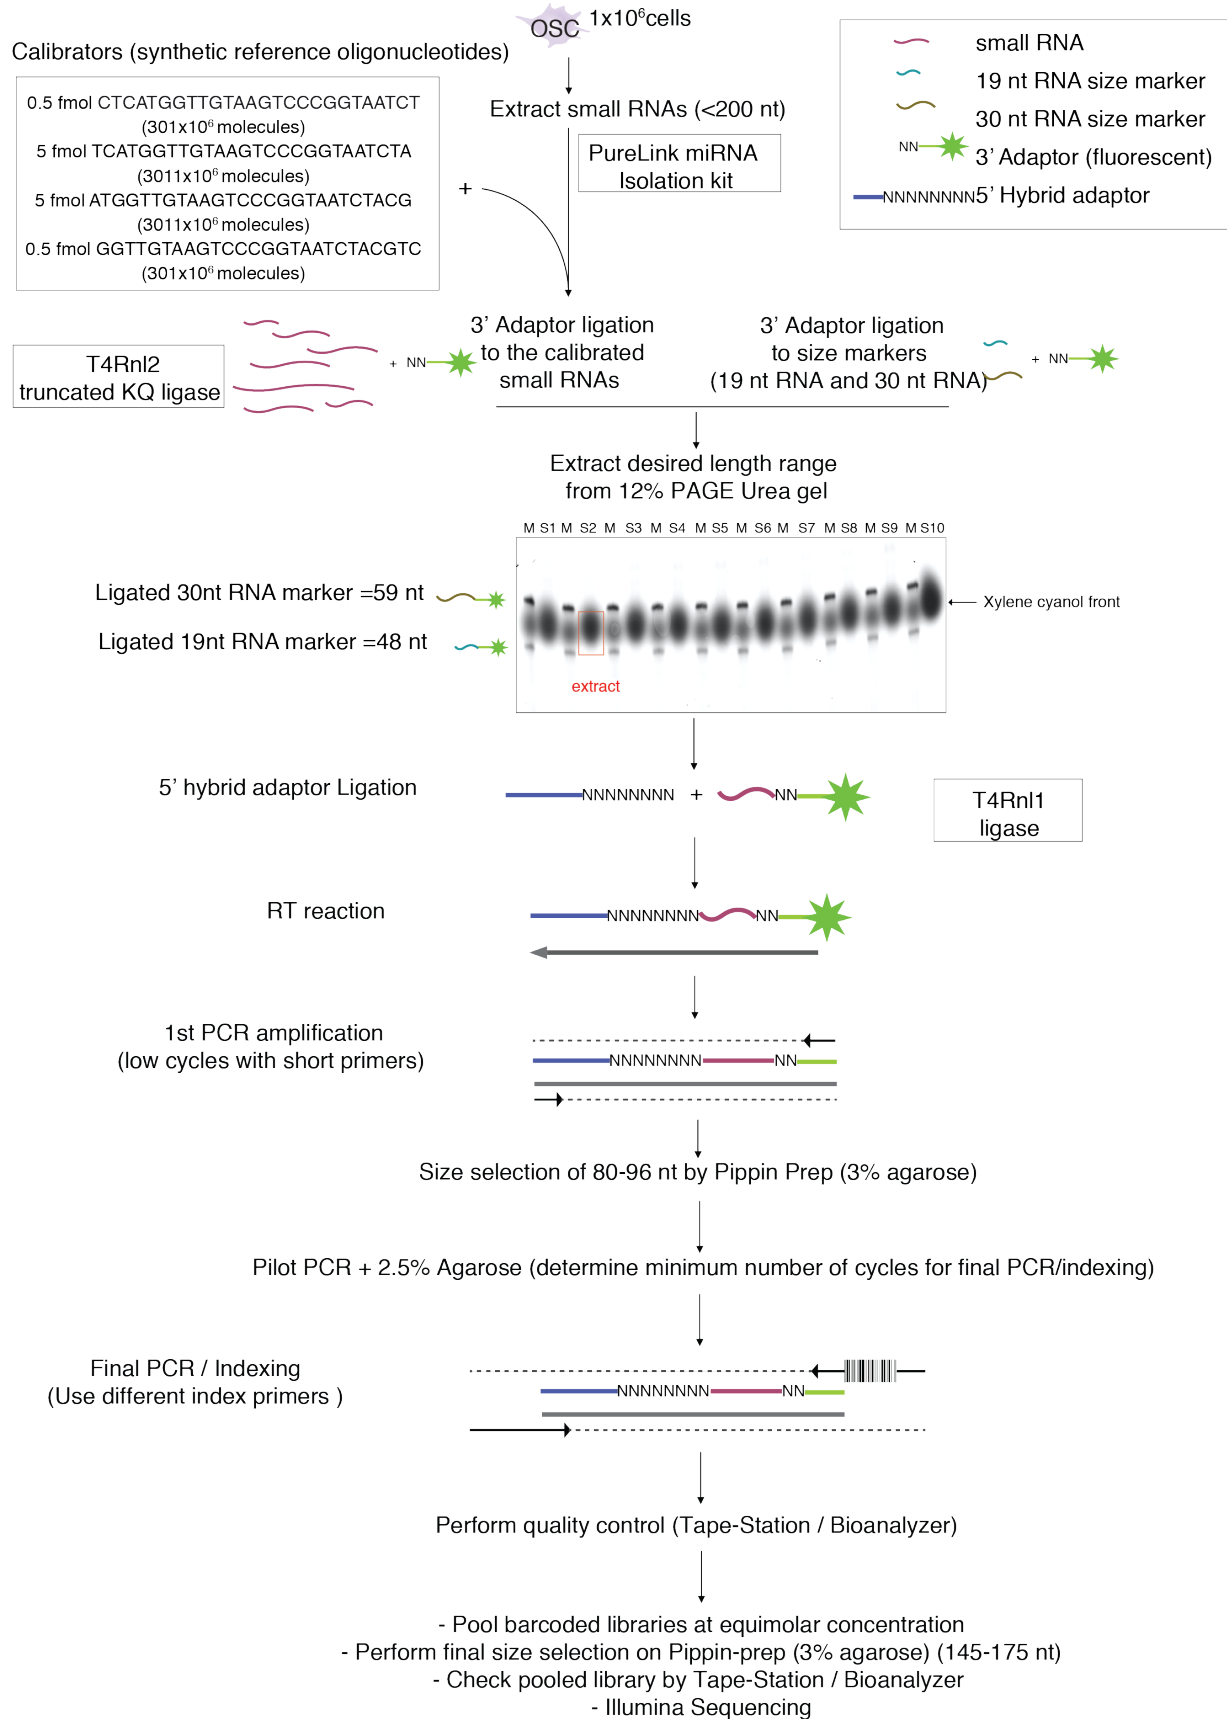

30 **Supplemental Fig. S2. Preparation of calibrated of small RNA samples for sequencing.** Construction of  
31 quantifiable small RNA libraries from ovarian somatic sheath cell (OSC). Small RNAs (<200 nt) were extracted from  
32  $1 \times 10^6$  cells and were spiked with known amounts of 4 different reference oligonucleotides (calibrators, 26 nt each).  
33 Samples were ligated to a 3' adaptor (29 nt long) bearing 2 UMIs (variable nucleotides, N) in its 3' end and were size  
34 selected (48-58nt) through 12% Urea PAGE. Extracted RNA was then ligated to a 5' adaptor (34 nt long) bearing 8  
35 UMIs (variable nucleotides, N) at its 3' end resulting in a total of 10 UMIs per cloned small RNA. Ligated RNA  
36 sequences were then reverse transcribed and amplified. After an initial low-cycle PCR, the products were size selected  
37 (80-96nt) using Pippin Prep to remove adaptor-adaptor byproducts. The recovered DNA was barcoded (3<sup>rd</sup> read  
38 barcodes) during a second low-cycle PCR. Samples were evaluated using TapeStation (Agilent). Finally, the pooled  
39 samples were run on a Pippin Prep to select for 145-175nt (This second size selection is not need if individual libraries  
40 after barcoding do not contain adapter-adapter byproducts). Sequencing data were generated on an Illumina NextSeq  
41 platform. Our final estimate is based on eight biological replicates (n=8).  
42

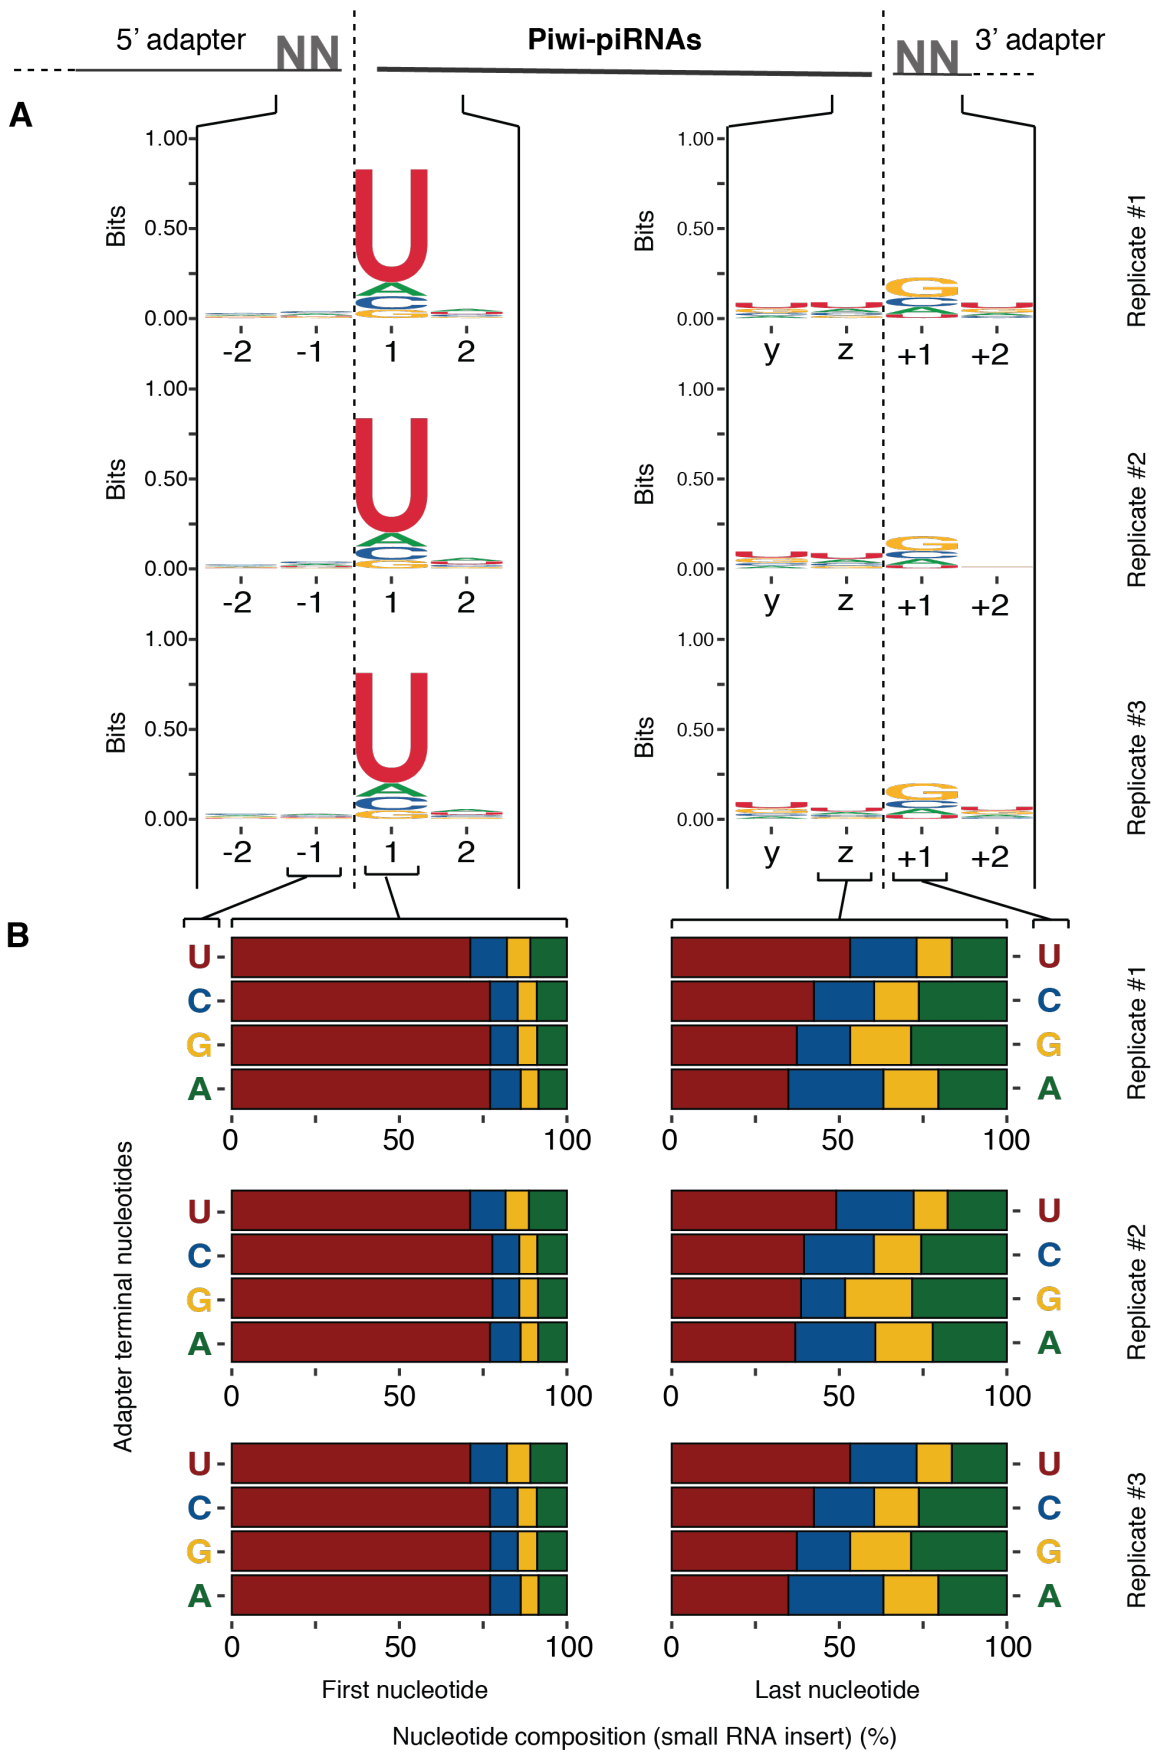

44 **Supplemental Figure S3. Quality control for potential sequence specific artifacts during sample**  
45 **preparation: Randomized adapter-terminal nucleotides, unique molecular identifiers (UMI), and**  
46 **biological replicates.** Piwi-piRNA were prepared for sequencing using adapters with random nucleotides  
47 (N) at their ligating termini to minimize potential sequence preferences during adapter ligation. Raw reads  
48 were trimmed of their constant adapter sequences and collapsed to remove PCR duplicates (using 10 UMIs).  
49 Analyses are shown for three biological replicates. (A) Sequence logos (ggseqlogo) for a 4nt sequence  
50 space surrounding the 5' and 3' ligation sites. The 1U-preference of Piwi-piRNAs (position 1) is not related  
51 to any sequence preference at position -1 (5'adapter: ligation-terminal nucleotide). Minimal sequence  
52 preferences are visible at the 3' ligation site. We speculate that the very slight avoidance of U in the +1  
53 position (3'adapter: ligation-terminal nucleotide) might reflect a preference against homopolymers (runs of  
54 Us) during sequencing. Given the (A)/U-richness of piRNA-producing genomic intervals, A and U might  
55 result in homopolymers to a greater extent and results in a slight disadvantage in representation during  
56 sequencing. (B) Reads were split into groups based on the identity of the adapter-terminal nucleotides  
57 (5'adapter: ligation-terminal nucleotide = position -1; 3'adapter: ligation-terminal nucleotide = position  
58 +1). The composition of the first and last nucleotide of the piRNA-insert are shown. The 1U-preference  
59 of Piwi-piRNAs can be observed with all possible adapter terminal nucleotides. [The slight reduction of  
60 the 1U fraction in 5' ligation events with Uridine (U) as adapter terminal nucleotide, might result from a  
61 preference of the system against homopolymers.] The general (A)/U-richness of piRNAs can be observed  
62 at their last nucleotides (position y and z). Slight variabilities can be observed with individual adapter-  
63 terminal nucleotides and between biological replicates. Our data support the current recommendation for  
64 randomized adapter-terminal nucleotides to minimize potential sequence specific effects, the use of unique  
65 molecular identifiers to correct for PCR-duplications and ensure accurate quantification, and the importance  
66 of biological replicates.  
67

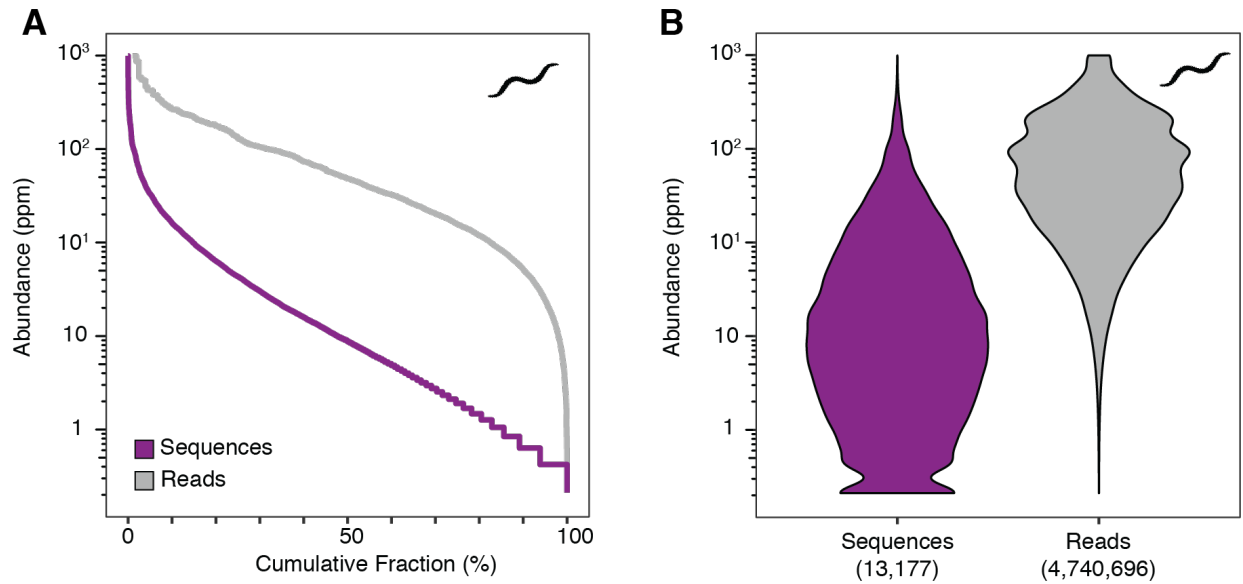

68  
69  
70  
71  
72  
73  
74  
75  
76  
77  
78  
79  
80  
81  
82

**Supplemental Figure S4. Worm PRG1-piRNAs (21U-RNAs) are variable in sequence abundance but less skewed than fly and mouse piRNAs.** In *C. elegans*, the main PIWI-clade Argonaute protein PRG1 associates with 21U-RNAs. Mechanisms of piRNA biogenesis in worms are not related to the mechanisms conserved in flies and mice. Each worm piRNA is determined by an individual transcriptional unit and produces a piRNA of defined sequence without sequence overlap with another piRNAs. PRG1-piRNAs were used from publicly available data (SRR538357), aligned to the *C. elegans* genome, and annotated using WS280/PRJNA13758. Sequence abundance was calculated as for fly and mouse piRNAs (Fig. 2). (A) Individual PRG1-piRNAs (21U-RNAs) were ranked by their abundance in parts per million (ppm). The cumulative fractions of sequences (purple) and reads (grey) are depicted. (B) Violin plots depict the distribution of sequence and reads with respect to their sequence abundance. The total number of sequences and reads in this data set are indicated.

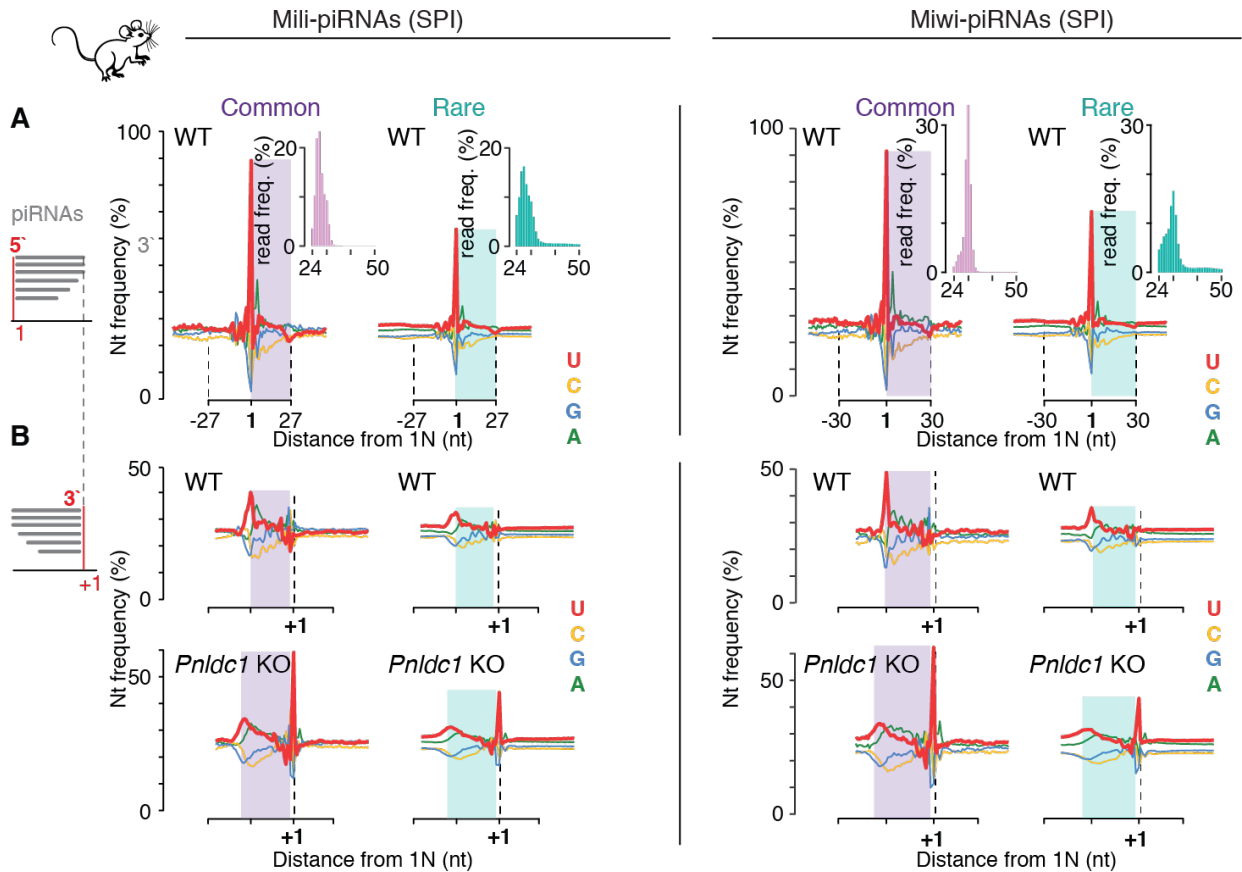

84  
85  
86  
87  
88  
89  
90  
91  
92  
93  
94  
95  
96  
97  
98

**Supplemental Fig. S5. 5' and 3' end processing signatures of Mili- and Miwi-piRNAs in primary spermatocytes (SPI).** Common and rare piRNAs exhibit similar processing signatures suggesting that they are generated by the same biogenesis machinery. Publicly available source data: SRA: PRJNA421205. **(A)** Common and rare piRNAs exhibit a preference for Uridine in the 5' most position (1U). Metagene analysis of uniquely mapping piRNAs that were aligned at their 5' end. The observed piRNAs are indicated by a colored box. An extended genomic interval is depicted. Insert: length distribution of common and rare piRNAs. **(B)** In mouse, the 3' ends of piRNAs are first processed by enucleolytic cleavage and then trimmed by the 3' to 5' exonuclease *Pnlcd1*. Common and rare piRNAs show a preference for Uridine in the genomic position following the piRNA 3' end that only becomes visible upon knock-out (KO) of the exonuclease *Pnlcd1* (+1U). Metagene analysis of uniquely mapping piRNAs that were aligned at their 3' end. The observed piRNAs are indicated by a colored box. An extended genomic interval is depicted.



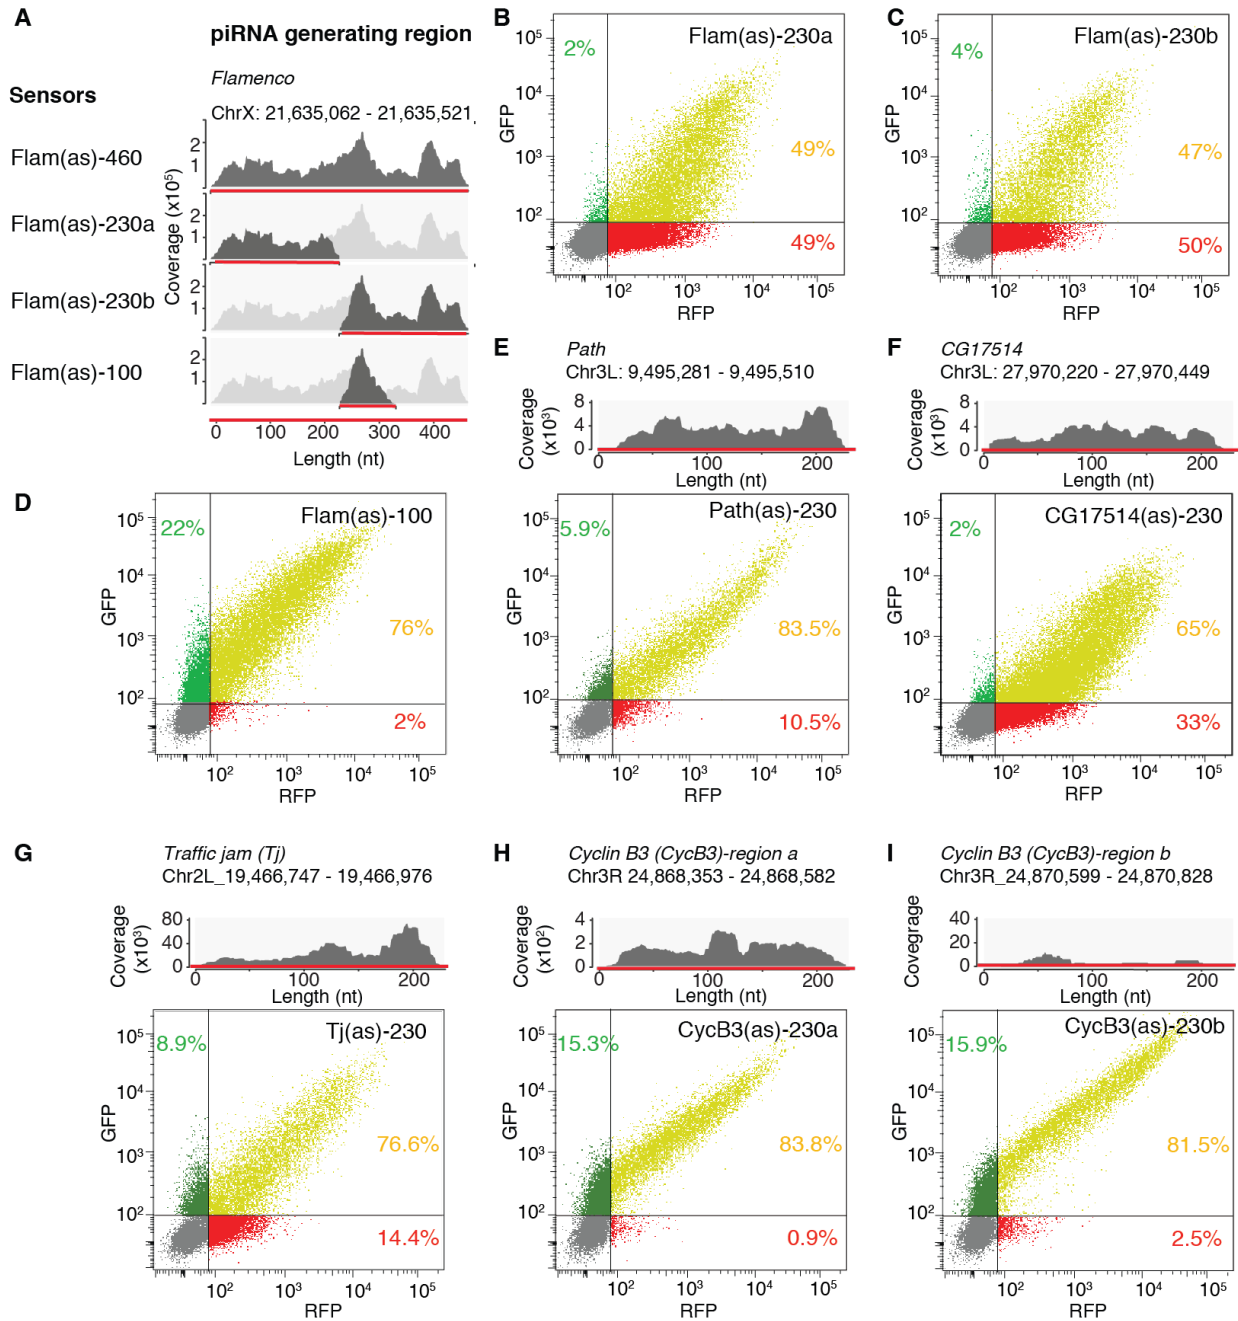

99  
 100 **Supplemental Fig. S6. Dual-fluorescence reporter assay for Piwi-piRNA silencing in ovarian somatic sheath**  
 101 **cells (OSC).** The reporter contained target sites for endogenous piRNAs in the 3'UTR of GFP. mCherry was  
 102 expressed as non-targeted control from the same plasmid (as in Fig. 4). GFP reports on targeting by endogenous  
 103 piRNAs that reduces the expression of GFP and results in the appearance of 'red only' cells. The fraction of green,  
 104 yellow (cells expressing red and green) and red cells is shown in % of all transfected cells. (A) PiRNA sensors with  
 105 antisense complementarity to different regions of *flamenco* (*lncRNA:flam*) (*flam*) (length (-n) in nucleotides (nt)).  
 106 Endogenous piRNAs that originate from the corresponding fragments of *flamenco* (*lncRNA:flam*) (*flam*) are shown as  
 107 coverage track. (B-D), The strength of piRNA silencing -indicated by the fraction of 'red-only', fully silenced cells-  
 108 varies between different reporter constructs. Flow cytometry analysis of ovarian somatic sheath cells that were  
 109 transfected with varying *flamenco* (*lncRNA:flam*) (*flam*) sensors (indicated in A). Cells were analyzed 48 hours after  
 110 transfection. (E-I) Sensors targeted by piRNAs produced from *pathetic* (*path*) (E), CG17514 (F), *traffic jam* (*tj*) (G),

111 and two different intervals of *cyclin B3* (*cycB3*) (**H, I**). Production of endogenous piRNAs by the sensed region is  
112 indicated as coverage track (top panel). Cells expressing the corresponding antisense sensors were analyzed by flow  
113 cytometry 48h after transfection. GFP shows piRNA-dependent silencing with varying strength for different target  
114 regions.

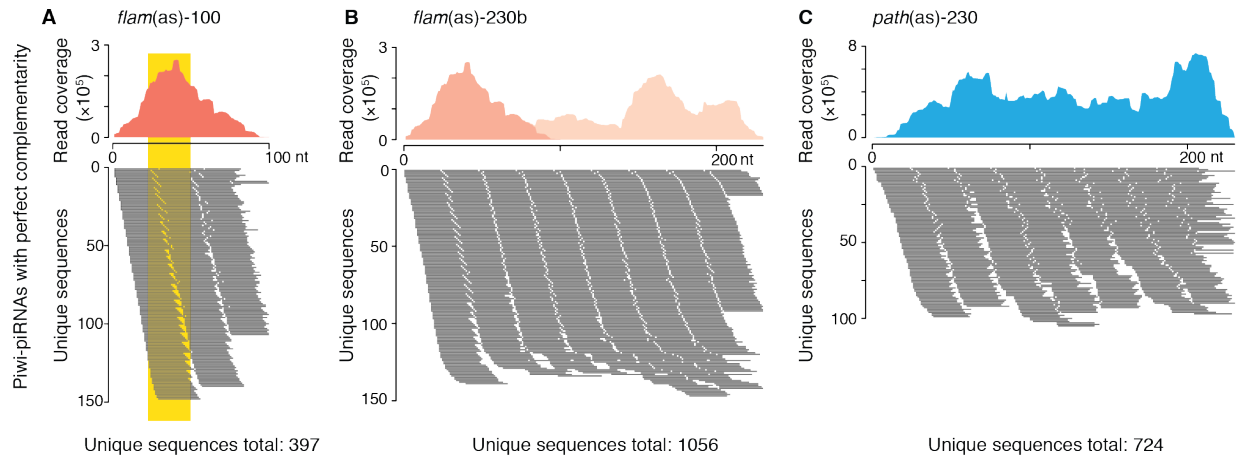

115  
116  
117  
118  
119  
120  
121  
122  
123  
124  
125  
126  
127  
128  
129  
130  
131

**Supplemental Figure S7. Design of Piwi-piRNA sensors.** Multiple piRNAs are produced from long single stranded transcripts in varying register in flies and mice. Reporter constructs are designed with antisense complementarity to parts of piRNA-generation regions. Endogenous piRNAs with perfect complementarity to the sensors are depicted. Unique sequences are shown sorted by their 5' start site. The total number of fully complementary sequences is indicated. **(A)** The shortest sensor, Flam(as)-100, is only 100nt long, which corresponds to the length of ~4 Piwi-piRNAs. However, this 100nt-long element can be targeted by 397 unique piRNA sequences with perfect sequence complementarity in overlapping intervals. **(B)** There are 1056 fully complementary endogenous Piwi-piRNA sequences for the 230nt long Flam(as)-230b, and **(C)** 724 fully complementary piRNA sequences for the 230nt long Path(as)-230 sensor. The dense coverage of diverse piRNA sequences and unknown rules for target engagement hamper the design of an unambiguous target-site for a single piRNA (one piRNA length indicated in yellow). Further studies are required to establish the rules of piRNA:target engagement and enable more precise sensor design and quantification of targeting piRNAs.
