# Supplementary material for: Cellular abundance shapes function in piRNA-guided genome defense
Source: HighWire-hosted journal article supplement (doi:10.1101/gr.275478.121), 2021-10-19
Supplement: Supplemental_table_S1.xlsx [file Supplemental_table_S1.xlsx]

## Sheet: Suppl_table_S1
Extended Data Table 1
sample	SRA/GEO_number	Number of replicates (n)	mean_number_of_sequences	mean_number_of_reads	ratio_of_seqences_to_reads
Drosophila OSC - Piwi	GEO: GSE156058 (this study)	3	7.81744e+06	81908827	0.0982927
Drosophila ovary - Piwi	SRR3715419	1	3355169	7643902	0.438934
Drosophila ovary - Aub	SRR3715420	1	1737648	5481996	0.316974
Drosophila ovary - Ago3	SRR3715421	1	837252	3668643	0.228218
Drosophila ovary - miRNA	SRR3715418 (*)	1	290	1980981	0.000146392
Mouse primary spermatocytes (PS) - MIWI	SRR7760307, SRR7760307	2	1948984	13383616	0.145991
Mouse primary spermatocytes (PS)- MILI	SRR7760331, SRR7760329	2	2.93292e+06	24571367	0.119703
Mouse - miRNA	SRR7760319, SRR7760317 (*)	2	290	87251	0.00332188
(*) - miRbase annotations were used to extract miRNAs

## Sheet: legend
Supplemental Table S1. Sequence diversity of piRNAs in flies and mice. Sequences and reads of piRNAs associated with different PIWI protein. Accession numbers are indicated.
