# Supplementary material for: Cellular abundance shapes function in piRNA-guided genome defense
Source: HighWire-hosted journal article supplement (doi:10.1101/gr.275478.121), 2021-10-19
Supplement: Supplemental_table_S2.xlsx [file Supplemental_table_S2.xlsx]

## Sheet: Suppl_table_S2
Sequence abundance	number_of_sequences	read_count	ppm_normalized_abundance	cumulative_fractions_sequences	cumulative_fraction_reads
29900	1	29900	447.175	1.64e-07	0.000447175
25250	1	25250	377.631	3.28e-07	0.000824806
23638	1	23638	353.522	4.92e-07	0.00117833
22552	1	22552	337.28	6.56e-07	0.00151561
18993	1	18993	284.053	8.2e-07	0.00179966
17754	1	17754	265.523	9.83e-07	0.00206519
17026	1	17026	254.635	1.15e-06	0.00231982
16910	1	16910	252.901	1.31e-06	0.00257272
16458	1	16458	246.141	1.48e-06	0.00281886
16027	1	16027	239.695	1.64e-06	0.00305856
15932	1	15932	238.274	1.8e-06	0.00329683
14263	1	14263	213.313	1.97e-06	0.00351014
14219	1	14219	212.655	2.13e-06	0.0037228
14118	1	14118	211.144	2.29e-06	0.00393394
14099	1	14099	210.86	2.46e-06	0.0041448
13909	1	13909	208.019	2.62e-06	0.00435282
13867	1	13867	207.39	2.79e-06	0.00456021
13160	1	13160	196.817	2.95e-06	0.00475703
12894	1	12894	192.839	3.11e-06	0.00494987
12657	1	12657	189.294	3.28e-06	0.00513916
12469	1	12469	186.482	3.44e-06	0.00532564
12385	1	12385	185.226	3.61e-06	0.00551087
12353	1	12353	184.747	3.77e-06	0.00569562
12333	1	12333	184.448	3.93e-06	0.00588006
12312	1	12312	184.134	4.1e-06	0.0060642
12203	1	12203	182.504	4.26e-06	0.0062467
12159	1	12159	181.846	4.43e-06	0.00642855
12001	1	12001	179.483	4.59e-06	0.00660803
11791	1	11791	176.342	4.75e-06	0.00678437
11704	1	11704	175.041	4.92e-06	0.00695942
11639	1	11639	174.069	5.08e-06	0.00713348
11528	1	11528	172.409	5.25e-06	0.00730589
11326	1	11326	169.388	5.41e-06	0.00747528
11312	1	11312	169.179	5.57e-06	0.00764446
11281	1	11281	168.715	5.74e-06	0.00781318
11192	1	11192	167.384	5.9e-06	0.00798056
11102	1	11102	166.038	6.06e-06	0.0081466
10855	1	10855	162.344	6.23e-06	0.00830894
10733	1	10733	160.519	6.39e-06	0.00846946
10634	1	10634	159.039	6.56e-06	0.0086285
10605	1	10605	158.605	6.72e-06	0.0087871
10582	1	10582	158.261	6.88e-06	0.00894537
10580	1	10580	158.231	7.05e-06	0.0091036
10579	1	10579	158.216	7.21e-06	0.00926181
10385	2	20770	155.315	7.54e-06	0.00957244
10371	1	10371	155.105	7.7e-06	0.00972755
10328	1	10328	154.462	7.87e-06	0.00988201
10289	1	10289	153.879	8.03e-06	0.0100359
10244	1	10244	153.206	8.2e-06	0.0101891
10155	1	10155	151.875	8.36e-06	0.010341
9960	1	9960	148.959	8.52e-06	0.0104899
9955	1	9955	148.884	8.69e-06	0.0106388
9884	1	9884	147.822	8.85e-06	0.0107866
9863	1	9863	147.508	9.02e-06	0.0109341
9844	1	9844	147.224	9.18e-06	0.0110814
9819	1	9819	146.85	9.34e-06	0.0112282
9810	1	9810	146.715	9.51e-06	0.0113749
9739	1	9739	145.653	9.67e-06	0.0115206
9719	1	9719	145.354	9.83e-06	0.0116659
9711	1	9711	145.235	1e-05	0.0118112
9690	1	9690	144.921	1.02e-05	0.0119561
9628	1	9628	143.993	1.03e-05	0.0121001
9578	1	9578	143.245	1.05e-05	0.0122433
9530	1	9530	142.528	1.07e-05	0.0123859
9462	1	9462	141.511	1.08e-05	0.0125274
9437	1	9437	141.137	1.1e-05	0.0126685
9401	1	9401	140.598	1.11e-05	0.0128091
9371	1	9371	140.15	1.13e-05	0.0129493
9223	1	9223	137.936	1.15e-05	0.0130872
9222	2	18444	137.921	1.18e-05	0.013363
9214	1	9214	137.802	1.2e-05	0.0135008
9187	1	9187	137.398	1.21e-05	0.0136382
9182	1	9182	137.323	1.23e-05	0.0137756
9178	1	9178	137.263	1.25e-05	0.0139128
9162	1	9162	137.024	1.26e-05	0.0140498
9063	1	9063	135.543	1.28e-05	0.0141854
8984	1	8984	134.362	1.29e-05	0.0143197
8976	1	8976	134.242	1.31e-05	0.014454
8959	1	8959	133.988	1.33e-05	0.014588
8921	1	8921	133.42	1.34e-05	0.0147214
8907	1	8907	133.21	1.36e-05	0.0148546
8873	1	8873	132.702	1.38e-05	0.0149873
8871	1	8871	132.672	1.39e-05	0.01512
8809	1	8809	131.745	1.41e-05	0.0152517
8772	1	8772	131.191	1.43e-05	0.0153829
8763	1	8763	131.057	1.44e-05	0.015514
8762	1	8762	131.042	1.46e-05	0.015645
8752	1	8752	130.892	1.48e-05	0.0157759
8720	1	8720	130.414	1.49e-05	0.0159063
8673	1	8673	129.711	1.51e-05	0.016036
8672	1	8672	129.696	1.52e-05	0.0161657
8579	1	8579	128.305	1.54e-05	0.016294
8495	1	8495	127.048	1.56e-05	0.0164211
8430	1	8430	126.076	1.57e-05	0.0165472
8427	1	8427	126.031	1.59e-05	0.0166732
8366	1	8366	125.119	1.61e-05	0.0167983
8352	1	8352	124.91	1.62e-05	0.0169232
8341	2	16682	124.745	1.66e-05	0.0171727
8304	1	8304	124.192	1.67e-05	0.0172969
8299	1	8299	124.117	1.69e-05	0.017421
8269	1	8269	123.668	1.7e-05	0.0175447
8220	1	8220	122.936	1.72e-05	0.0176676
8202	1	8202	122.666	1.74e-05	0.0177903
8190	1	8190	122.487	1.75e-05	0.0179128
8123	1	8123	121.485	1.77e-05	0.0180343
8114	1	8114	121.35	1.79e-05	0.0181556
8032	1	8032	120.124	1.8e-05	0.0182757
8026	1	8026	120.034	1.82e-05	0.0183958
8025	1	8025	120.019	1.84e-05	0.0185158
7978	1	7978	119.316	1.85e-05	0.0186351
7970	1	7970	119.197	1.87e-05	0.0187543
7925	1	7925	118.524	1.89e-05	0.0188728
7917	1	7917	118.404	1.9e-05	0.0189912
7909	1	7909	118.284	1.92e-05	0.0191095
7897	1	7897	118.105	1.93e-05	0.0192276
7895	1	7895	118.075	1.95e-05	0.0193457
7878	1	7878	117.821	1.97e-05	0.0194635
7866	2	15732	117.641	2e-05	0.0196988
7855	1	7855	117.477	2.02e-05	0.0198163
7848	1	7848	117.372	2.03e-05	0.0199336
7840	1	7840	117.253	2.05e-05	0.0200509
7825	1	7825	117.028	2.07e-05	0.0201679
7809	1	7809	116.789	2.08e-05	0.0202847
7713	1	7713	115.353	2.1e-05	0.0204001
7696	1	7696	115.099	2.11e-05	0.0205152
7695	1	7695	115.084	2.13e-05	0.0206303
7663	1	7663	114.605	2.15e-05	0.0207449
7662	1	7662	114.59	2.16e-05	0.0208594
7589	1	7589	113.499	2.18e-05	0.0209729
7573	2	15146	113.259	2.21e-05	0.0211995
7541	1	7541	112.781	2.23e-05	0.0213122
7536	1	7536	112.706	2.25e-05	0.021425
7504	1	7504	112.227	2.26e-05	0.0215372
7502	1	7502	112.197	2.28e-05	0.0216494
7489	1	7489	112.003	2.29e-05	0.0217614
7446	1	7446	111.36	2.31e-05	0.0218727
7444	1	7444	111.33	2.33e-05	0.0219841
7438	1	7438	111.24	2.34e-05	0.0220953
7422	1	7422	111.001	2.36e-05	0.0222063
7391	1	7391	110.537	2.38e-05	0.0223168
7378	1	7378	110.343	2.39e-05	0.0224272
7375	1	7375	110.298	2.41e-05	0.0225375
7367	1	7367	110.178	2.43e-05	0.0226477
7362	1	7362	110.104	2.44e-05	0.0227578
7361	1	7361	110.089	2.46e-05	0.0228679
7350	1	7350	109.924	2.48e-05	0.0229778
7320	1	7320	109.476	2.49e-05	0.0230873
7309	1	7309	109.311	2.51e-05	0.0231966
7260	1	7260	108.578	2.52e-05	0.0233051
7253	1	7253	108.474	2.54e-05	0.0234136
7252	1	7252	108.459	2.56e-05	0.0235221
7251	1	7251	108.444	2.57e-05	0.0236305
7238	1	7238	108.249	2.59e-05	0.0237388
7229	1	7229	108.115	2.61e-05	0.0238469
7179	1	7179	107.367	2.62e-05	0.0239543
7178	1	7178	107.352	2.64e-05	0.0240616
7161	1	7161	107.098	2.66e-05	0.0241687
7132	1	7132	106.664	2.67e-05	0.0242754
7126	1	7126	106.574	2.69e-05	0.0243819
7118	1	7118	106.455	2.7e-05	0.0244884
7116	1	7116	106.425	2.72e-05	0.0245948
7107	1	7107	106.29	2.74e-05	0.0247011
7091	1	7091	106.051	2.75e-05	0.0248072
7078	1	7078	105.856	2.77e-05	0.024913
7063	1	7063	105.632	2.79e-05	0.0250186
7041	1	7041	105.303	2.8e-05	0.025124
7040	1	7040	105.288	2.82e-05	0.0252292
7029	1	7029	105.123	2.84e-05	0.0253344
6970	1	6970	104.241	2.85e-05	0.0254386
6958	1	6958	104.062	2.87e-05	0.0255427
6939	1	6939	103.777	2.88e-05	0.0256464
6926	1	6926	103.583	2.9e-05	0.02575
6919	1	6919	103.478	2.92e-05	0.0258535
6910	1	6910	103.344	2.93e-05	0.0259569
6892	1	6892	103.075	2.95e-05	0.0260599
6887	1	6887	103	2.97e-05	0.0261629
6870	1	6870	102.746	2.98e-05	0.0262657
6848	1	6848	102.416	3e-05	0.0263681
6840	1	6840	102.297	3.02e-05	0.0264704
6828	1	6828	102.117	3.03e-05	0.0265725
6823	1	6823	102.043	3.05e-05	0.0266745
6819	1	6819	101.983	3.07e-05	0.0267765
6806	1	6806	101.788	3.08e-05	0.0268783
6804	1	6804	101.758	3.1e-05	0.0269801
6781	1	6781	101.414	3.11e-05	0.0270815
6762	1	6762	101.13	3.13e-05	0.0271826
6761	1	6761	101.115	3.15e-05	0.0272837
6745	1	6745	100.876	3.16e-05	0.0273846
6742	1	6742	100.831	3.18e-05	0.0274854
6729	1	6729	100.637	3.2e-05	0.0275861
6728	1	6728	100.622	3.21e-05	0.0276867
6723	1	6723	100.547	3.23e-05	0.0277872
6718	1	6718	100.472	3.25e-05	0.0278877
6706	1	6706	100.293	3.26e-05	0.027988
6690	1	6690	100.053	3.28e-05	0.0280881
6683	1	6683	99.9488	3.29e-05	0.028188
6671	1	6671	99.7693	3.31e-05	0.0282878
6661	2	13322	99.6198	3.34e-05	0.028487
6648	1	6648	99.4253	3.36e-05	0.0285864
6633	1	6633	99.201	3.38e-05	0.0286856
6632	1	6632	99.1861	3.39e-05	0.0287848
6599	1	6599	98.6925	3.41e-05	0.0288835
6588	1	6588	98.528	3.43e-05	0.0289821
6586	1	6586	98.4981	3.44e-05	0.0290806
6585	1	6585	98.4831	3.46e-05	0.029179
6570	1	6570	98.2588	3.48e-05	0.0292773
6562	1	6562	98.1392	3.49e-05	0.0293754
6546	1	6546	97.8999	3.51e-05	0.0294733
6493	1	6493	97.1072	3.52e-05	0.0295704
6478	1	6478	96.8829	3.54e-05	0.0296673
6462	1	6462	96.6436	3.56e-05	0.029764
6443	1	6443	96.3594	3.57e-05	0.0298603
6427	1	6427	96.1201	3.59e-05	0.0299564
6412	2	12824	95.8958	3.62e-05	0.0301482
6409	1	6409	95.8509	3.64e-05	0.0302441
6394	1	6394	95.6266	3.66e-05	0.0303397
6385	1	6385	95.492	3.67e-05	0.0304352
6374	1	6374	95.3275	3.69e-05	0.0305305
6373	1	6373	95.3125	3.7e-05	0.0306258
6372	1	6372	95.2976	3.72e-05	0.0307211
6370	1	6370	95.2677	3.74e-05	0.0308164
6364	1	6364	95.1779	3.75e-05	0.0309116
6350	1	6350	94.9686	3.77e-05	0.0310066
6348	1	6348	94.9386	3.79e-05	0.0311015
6337	1	6337	94.7741	3.8e-05	0.0311963
6332	1	6332	94.6994	3.82e-05	0.031291
6300	1	6300	94.2208	3.84e-05	0.0313852
6279	1	6279	93.9067	3.85e-05	0.0314791
6270	1	6270	93.7721	3.87e-05	0.0315729
6250	1	6250	93.473	3.88e-05	0.0316663
6214	1	6214	92.9346	3.9e-05	0.0317593
6211	1	6211	92.8897	3.92e-05	0.0318522
6209	1	6209	92.8598	3.93e-05	0.031945
6205	1	6205	92.8	3.95e-05	0.0320378
6196	1	6196	92.6654	3.97e-05	0.0321305
6182	1	6182	92.456	3.98e-05	0.032223
6169	1	6169	92.2616	4e-05	0.0323152
6167	1	6167	92.2317	4.02e-05	0.0324074
6165	1	6165	92.2018	4.03e-05	0.0324996
6159	1	6159	92.112	4.05e-05	0.0325918
6154	1	6154	92.0372	4.07e-05	0.0326838
6136	1	6136	91.768	4.08e-05	0.0327756
6115	1	6115	91.454	4.1e-05	0.032867
6102	1	6102	91.2595	4.11e-05	0.0329583
6087	1	6087	91.0352	4.13e-05	0.0330493
6083	1	6083	90.9754	4.15e-05	0.0331403
6082	1	6082	90.9604	4.16e-05	0.0332312
6073	1	6073	90.8258	4.18e-05	0.0333221
6060	1	6060	90.6314	4.2e-05	0.0334127
6050	1	6050	90.4819	4.21e-05	0.0335032
6048	1	6048	90.4519	4.23e-05	0.0335936
6047	1	6047	90.437	4.25e-05	0.0336841
6042	1	6042	90.3622	4.26e-05	0.0337744
6037	1	6037	90.2874	4.28e-05	0.0338647
6027	1	6027	90.1379	4.29e-05	0.0339549
6016	1	6016	89.9734	4.31e-05	0.0340448
6010	1	6010	89.8836	4.33e-05	0.0341347
5969	1	5969	89.2704	4.34e-05	0.034224
5965	1	5965	89.2106	4.36e-05	0.0343132
5963	1	5963	89.1807	4.38e-05	0.0344024
5955	2	11910	89.0611	4.41e-05	0.0345805
5931	1	5931	88.7021	4.43e-05	0.0346692
5918	1	5918	88.5077	4.44e-05	0.0347577
5914	1	5914	88.4479	4.46e-05	0.0348462
5912	1	5912	88.418	4.47e-05	0.0349346
5899	2	11798	88.2235	4.51e-05	0.035111
5884	1	5884	87.9992	4.52e-05	0.035199
5882	1	5882	87.9693	4.54e-05	0.035287
5866	1	5866	87.73	4.56e-05	0.0353747
5860	1	5860	87.6403	4.57e-05	0.0354624
5851	1	5851	87.5057	4.59e-05	0.0355499
5840	1	5840	87.3412	4.61e-05	0.0356372
5831	1	5831	87.2066	4.62e-05	0.0357244
5830	1	5830	87.1916	4.64e-05	0.0358116
5829	1	5829	87.1766	4.66e-05	0.0358988
5815	1	5815	86.9673	4.67e-05	0.0359858
5808	1	5808	86.8626	4.69e-05	0.0360726
5804	1	5804	86.8028	4.7e-05	0.0361594
5778	1	5778	86.4139	4.72e-05	0.0362458
5760	1	5760	86.1447	4.74e-05	0.036332
5759	1	5759	86.1297	4.75e-05	0.0364181
5743	1	5743	85.8905	4.77e-05	0.036504
5730	1	5730	85.696	4.79e-05	0.0365897
5722	1	5722	85.5764	4.8e-05	0.0366753
5717	1	5717	85.5016	4.82e-05	0.0367608
5711	1	5711	85.4119	4.84e-05	0.0368462
5706	1	5706	85.3371	4.85e-05	0.0369315
5704	1	5704	85.3072	4.87e-05	0.0370168
5695	1	5695	85.1726	4.88e-05	0.037102
5694	1	5694	85.1576	4.9e-05	0.0371872
5681	1	5681	84.9632	4.92e-05	0.0372721
5672	1	5672	84.8286	4.93e-05	0.0373569
5666	1	5666	84.7389	4.95e-05	0.0374417
5644	1	5644	84.4098	4.97e-05	0.0375261
5640	1	5640	84.35	4.98e-05	0.0376104
5635	1	5635	84.2752	5e-05	0.0376947
5632	1	5632	84.2304	5.02e-05	0.037779
5630	1	5630	84.2005	5.03e-05	0.0378632
5618	1	5618	84.021	5.05e-05	0.0379472
5607	1	5607	83.8565	5.07e-05	0.038031
5594	1	5594	83.6621	5.08e-05	0.0381147
5587	1	5587	83.5574	5.1e-05	0.0381983
5585	1	5585	83.5275	5.11e-05	0.0382818
5581	1	5581	83.4676	5.13e-05	0.0383652
5567	1	5567	83.2583	5.15e-05	0.0384485
5561	1	5561	83.1685	5.16e-05	0.0385317
5559	1	5559	83.1386	5.18e-05	0.0386148
5544	1	5544	82.9143	5.2e-05	0.0386977
5533	1	5533	82.7498	5.21e-05	0.0387805
5531	2	11062	82.7199	5.25e-05	0.0389459
5528	2	11056	82.675	5.28e-05	0.0391113
5527	1	5527	82.66	5.29e-05	0.0391939
5522	1	5522	82.5853	5.31e-05	0.0392765
5510	1	5510	82.4058	5.33e-05	0.0393589
5509	2	11018	82.3908	5.36e-05	0.0395237
5507	1	5507	82.3609	5.38e-05	0.0396061
5506	1	5506	82.346	5.39e-05	0.0396884
5499	1	5499	82.2413	5.41e-05	0.0397706
5486	2	10972	82.0468	5.44e-05	0.0399347
5482	1	5482	81.987	5.46e-05	0.0400167
5465	1	5465	81.7328	5.47e-05	0.0400985
5463	1	5463	81.7029	5.49e-05	0.0401802
5455	2	10910	81.5832	5.52e-05	0.0403433
5450	1	5450	81.5084	5.54e-05	0.0404248
5442	1	5442	81.3888	5.56e-05	0.0405062
5428	1	5428	81.1794	5.57e-05	0.0405874
5427	1	5427	81.1645	5.59e-05	0.0406686
5424	2	10848	81.1196	5.62e-05	0.0408308
5414	1	5414	80.97	5.64e-05	0.0409118
5410	1	5410	80.9102	5.66e-05	0.0409927
5400	1	5400	80.7607	5.67e-05	0.0410735
5390	1	5390	80.6111	5.69e-05	0.0411541
5383	2	10766	80.5064	5.72e-05	0.0413151
5382	1	5382	80.4915	5.74e-05	0.0413956
5381	1	5381	80.4765	5.75e-05	0.041476
5376	1	5376	80.4017	5.77e-05	0.0415564
5375	2	10750	80.3868	5.8e-05	0.0417172
5372	1	5372	80.3419	5.82e-05	0.0417976
5369	1	5369	80.297	5.84e-05	0.0418779
5365	1	5365	80.2372	5.85e-05	0.0419581
5344	1	5344	79.9231	5.87e-05	0.042038
5343	1	5343	79.9082	5.88e-05	0.0421179
5342	1	5342	79.8932	5.9e-05	0.0421978
5341	1	5341	79.8783	5.92e-05	0.0422777
5335	1	5335	79.7885	5.93e-05	0.0423575
5325	1	5325	79.639	5.95e-05	0.0424371
5313	1	5313	79.4595	5.97e-05	0.0425166
5309	2	10618	79.3997	6e-05	0.0426754
5304	1	5304	79.3249	6.02e-05	0.0427547
5298	1	5298	79.2352	6.03e-05	0.0428339
5291	1	5291	79.1305	6.05e-05	0.0429131
5275	1	5275	78.8912	6.06e-05	0.042992
5267	1	5267	78.7716	6.08e-05	0.0430707
5266	1	5266	78.7566	6.1e-05	0.0431495
5262	1	5262	78.6968	6.11e-05	0.0432282
5257	1	5257	78.622	6.13e-05	0.0433068
5252	1	5252	78.5472	6.15e-05	0.0433854
5249	1	5249	78.5024	6.16e-05	0.0434639
5244	1	5244	78.4276	6.18e-05	0.0435423
5236	1	5236	78.3079	6.2e-05	0.0436206
5227	1	5227	78.1733	6.21e-05	0.0436988
5219	1	5219	78.0537	6.23e-05	0.0437768
5214	1	5214	77.9789	6.25e-05	0.0438548
5202	1	5202	77.7994	6.26e-05	0.0439326
5190	1	5190	77.62	6.28e-05	0.0440102
5183	1	5183	77.5153	6.29e-05	0.0440877
5173	1	5173	77.3657	6.31e-05	0.0441651
5168	1	5168	77.2909	6.33e-05	0.0442424
5167	1	5167	77.276	6.34e-05	0.0443197
5159	1	5159	77.1563	6.36e-05	0.0443968
5146	1	5146	76.9619	6.38e-05	0.0444738
5142	1	5142	76.9021	6.39e-05	0.0445507
5137	1	5137	76.8273	6.41e-05	0.0446275
5134	1	5134	76.7824	6.43e-05	0.0447043
5133	1	5133	76.7675	6.44e-05	0.0447811
5112	1	5112	76.4534	6.46e-05	0.0448575
5091	1	5091	76.1394	6.47e-05	0.0449337
5077	1	5077	75.93	6.49e-05	0.0450096
5076	1	5076	75.915	6.51e-05	0.0450855
5069	1	5069	75.8103	6.52e-05	0.0451613
5051	1	5051	75.5411	6.54e-05	0.0452369
5048	1	5048	75.4963	6.56e-05	0.0453124
5043	1	5043	75.4215	6.57e-05	0.0453878
5042	2	10084	75.4065	6.61e-05	0.0455386
5041	3	15123	75.3916	6.66e-05	0.0457648
5039	1	5039	75.3617	6.67e-05	0.0458401
5035	1	5035	75.3018	6.69e-05	0.0459154
5030	1	5030	75.2271	6.7e-05	0.0459907
5027	1	5027	75.1822	6.72e-05	0.0460658
5020	1	5020	75.0775	6.74e-05	0.0461409
5019	1	5019	75.0625	6.75e-05	0.046216
5010	1	5010	74.9279	6.77e-05	0.0462909
5009	1	5009	74.913	6.79e-05	0.0463658
5005	1	5005	74.8532	6.8e-05	0.0464407
4996	1	4996	74.7186	6.82e-05	0.0465154
4993	1	4993	74.6737	6.84e-05	0.0465901
4990	1	4990	74.6288	6.85e-05	0.0466647
4989	1	4989	74.6139	6.87e-05	0.0467393
4983	2	9966	74.5241	6.9e-05	0.0468884
4980	1	4980	74.4793	6.92e-05	0.0469628
4979	1	4979	74.4643	6.93e-05	0.0470373
4968	1	4968	74.2998	6.95e-05	0.0471116
4967	1	4967	74.2849	6.97e-05	0.0471859
4966	1	4966	74.2699	6.98e-05	0.0472602
4961	1	4961	74.1951	7e-05	0.0473343
4960	1	4960	74.1802	7.02e-05	0.0474085
4949	1	4949	74.0156	7.03e-05	0.0474825
4945	2	9890	73.9558	7.06e-05	0.0476305
4942	2	9884	73.911	7.1e-05	0.0477783
4932	1	4932	73.7614	7.11e-05	0.047852
4920	1	4920	73.5819	7.13e-05	0.0479256
4913	1	4913	73.4772	7.15e-05	0.0479991
4909	1	4909	73.4174	7.16e-05	0.0480725
4906	1	4906	73.3726	7.18e-05	0.0481459
4903	1	4903	73.3277	7.2e-05	0.0482192
4891	1	4891	73.1482	7.21e-05	0.0482924
4880	1	4880	72.9837	7.23e-05	0.0483653
4874	1	4874	72.894	7.25e-05	0.0484382
4873	1	4873	72.879	7.26e-05	0.0485111
4867	1	4867	72.7893	7.28e-05	0.0485839
4863	1	4863	72.7295	7.29e-05	0.0486566
4854	1	4854	72.5949	7.31e-05	0.0487292
4847	1	4847	72.4902	7.33e-05	0.0488017
4846	1	4846	72.4752	7.34e-05	0.0488742
4845	1	4845	72.4603	7.36e-05	0.0489467
4839	1	4839	72.3705	7.38e-05	0.049019
4832	1	4832	72.2658	7.39e-05	0.0490913
4830	1	4830	72.2359	7.41e-05	0.0491635
4824	1	4824	72.1462	7.43e-05	0.0492357
4814	1	4814	71.9966	7.44e-05	0.0493077
4813	1	4813	71.9817	7.46e-05	0.0493797
4812	3	14436	71.9667	7.51e-05	0.0495956
4807	1	4807	71.8919	7.52e-05	0.0496674
4801	1	4801	71.8022	7.54e-05	0.0497392
4797	1	4797	71.7424	7.56e-05	0.049811
4793	1	4793	71.6826	7.57e-05	0.0498827
4790	1	4790	71.6377	7.59e-05	0.0499543
4782	1	4782	71.5181	7.61e-05	0.0500258
4776	2	9552	71.4283	7.64e-05	0.0501687
4769	1	4769	71.3236	7.65e-05	0.05024
4763	1	4763	71.2339	7.67e-05	0.0503112
4760	1	4760	71.189	7.69e-05	0.0503824
4759	1	4759	71.1741	7.7e-05	0.0504536
4756	1	4756	71.1292	7.72e-05	0.0505247
4753	1	4753	71.0843	7.74e-05	0.0505958
4748	3	14244	71.0096	7.79e-05	0.0508088
4743	2	9486	70.9348	7.82e-05	0.0509507
4742	1	4742	70.9198	7.84e-05	0.0510216
4738	1	4738	70.86	7.85e-05	0.0510925
4736	1	4736	70.8301	7.87e-05	0.0511633
4731	1	4731	70.7553	7.88e-05	0.0512341
4729	1	4729	70.7254	7.9e-05	0.0513048
4723	1	4723	70.6357	7.92e-05	0.0513754
4719	1	4719	70.5758	7.93e-05	0.051446
4717	2	9434	70.5459	7.97e-05	0.0515871
4714	1	4714	70.5011	7.98e-05	0.0516576
4704	1	4704	70.3515	8e-05	0.051728
4703	1	4703	70.3366	8.02e-05	0.0517983
4702	1	4702	70.3216	8.03e-05	0.0518686
4699	2	9398	70.2767	8.06e-05	0.0520092
4688	1	4688	70.1122	8.08e-05	0.0520793
4681	1	4681	70.0075	8.1e-05	0.0521493
4678	1	4678	69.9627	8.11e-05	0.0522193
4676	1	4676	69.9327	8.13e-05	0.0522892
4668	1	4668	69.8131	8.15e-05	0.052359
4657	1	4657	69.6486	8.16e-05	0.0524287
4652	1	4652	69.5738	8.18e-05	0.0524982
4651	1	4651	69.5589	8.2e-05	0.0525678
4641	1	4641	69.4093	8.21e-05	0.0526372
4640	1	4640	69.3943	8.23e-05	0.0527066
4638	2	9276	69.3644	8.26e-05	0.0528453
4634	1	4634	69.3046	8.28e-05	0.0529146
4633	1	4633	69.2897	8.29e-05	0.0529839
4625	1	4625	69.17	8.31e-05	0.0530531
4620	1	4620	69.0952	8.33e-05	0.0531222
4604	1	4604	68.8559	8.34e-05	0.053191
4596	1	4596	68.7363	8.36e-05	0.0532598
4594	1	4594	68.7064	8.38e-05	0.0533285
4593	1	4593	68.6914	8.39e-05	0.0533972
4587	1	4587	68.6017	8.41e-05	0.0534658
4581	1	4581	68.512	8.43e-05	0.0535343
4575	1	4575	68.4222	8.44e-05	0.0536027
4573	1	4573	68.3923	8.46e-05	0.0536711
4570	1	4570	68.3474	8.47e-05	0.0537394
4569	1	4569	68.3325	8.49e-05	0.0538078
4564	1	4564	68.2577	8.51e-05	0.053876
4554	1	4554	68.1082	8.52e-05	0.0539441
4553	1	4553	68.0932	8.54e-05	0.0540122
4551	1	4551	68.0633	8.56e-05	0.0540803
4550	1	4550	68.0483	8.57e-05	0.0541483
4545	1	4545	67.9736	8.59e-05	0.0542163
4544	1	4544	67.9586	8.61e-05	0.0542843
4536	2	9072	67.839	8.64e-05	0.05442
4532	1	4532	67.7791	8.65e-05	0.0544877
4525	1	4525	67.6744	8.67e-05	0.0545554
4523	1	4523	67.6445	8.69e-05	0.0546231
4522	1	4522	67.6296	8.7e-05	0.0546907
4516	1	4516	67.5398	8.72e-05	0.0547582
4512	1	4512	67.48	8.74e-05	0.0548257
4511	1	4511	67.4651	8.75e-05	0.0548932
4508	1	4508	67.4202	8.77e-05	0.0549606
4507	1	4507	67.4052	8.79e-05	0.055028
4504	1	4504	67.3604	8.8e-05	0.0550954
4500	1	4500	67.3006	8.82e-05	0.0551627
4497	1	4497	67.2557	8.84e-05	0.0552299
4494	1	4494	67.2108	8.85e-05	0.0552971
4492	2	8984	67.1809	8.88e-05	0.0554315
4484	1	4484	67.0613	8.9e-05	0.0554985
4481	1	4481	67.0164	8.92e-05	0.0555656
4480	1	4480	67.0014	8.93e-05	0.0556326
4478	1	4478	66.9715	8.95e-05	0.0556995
4476	1	4476	66.9416	8.97e-05	0.0557665
4473	1	4473	66.8967	8.98e-05	0.0558334
4466	1	4466	66.7921	9e-05	0.0559002
4461	1	4461	66.7173	9.02e-05	0.0559669
4460	1	4460	66.7023	9.03e-05	0.0560336
4457	1	4457	66.6575	9.05e-05	0.0561002
4454	2	8908	66.6126	9.08e-05	0.0562335
4447	1	4447	66.5079	9.1e-05	0.0563
4440	1	4440	66.4032	9.11e-05	0.0563664
4438	1	4438	66.3733	9.13e-05	0.0564328
4436	1	4436	66.3434	9.15e-05	0.0564991
4435	2	8870	66.3284	9.18e-05	0.0566318
4430	1	4430	66.2537	9.2e-05	0.056698
4428	1	4428	66.2237	9.21e-05	0.0567642
4427	1	4427	66.2088	9.23e-05	0.0568304
4424	1	4424	66.1639	9.24e-05	0.0568966
4421	1	4421	66.1191	9.26e-05	0.0569627
4419	1	4419	66.0891	9.28e-05	0.0570288
4411	1	4411	65.9695	9.29e-05	0.0570948
4410	1	4410	65.9545	9.31e-05	0.0571607
4408	1	4408	65.9246	9.33e-05	0.0572267
4407	1	4407	65.9097	9.34e-05	0.0572926
4406	2	8812	65.8947	9.38e-05	0.0574244
4401	1	4401	65.8199	9.39e-05	0.0574902
4391	1	4391	65.6704	9.41e-05	0.0575558
4385	1	4385	65.5806	9.43e-05	0.0576214
4380	1	4380	65.5059	9.44e-05	0.0576869
4378	1	4378	65.476	9.46e-05	0.0577524
4377	1	4377	65.461	9.47e-05	0.0578179
4376	1	4376	65.446	9.49e-05	0.0578833
4375	1	4375	65.4311	9.51e-05	0.0579488
4374	1	4374	65.4161	9.52e-05	0.0580142
4367	1	4367	65.3114	9.54e-05	0.0580795
4363	2	8726	65.2516	9.57e-05	0.05821
4361	1	4361	65.2217	9.59e-05	0.0582752
4358	1	4358	65.1768	9.61e-05	0.0583404
4357	1	4357	65.1619	9.62e-05	0.0584055
4356	3	13068	65.1469	9.67e-05	0.058601
4349	1	4349	65.0422	9.69e-05	0.058666
4348	1	4348	65.0273	9.7e-05	0.0587311
4345	1	4345	64.9824	9.72e-05	0.058796
4344	1	4344	64.9675	9.74e-05	0.058861
4343	1	4343	64.9525	9.75e-05	0.058926
4342	2	8684	64.9376	9.79e-05	0.0590558
4336	1	4336	64.8478	9.8e-05	0.0591207
4333	1	4333	64.803	9.82e-05	0.0591855
4327	2	8654	64.7132	9.85e-05	0.0593149
4326	1	4326	64.6983	9.87e-05	0.0593796
4321	1	4321	64.6235	9.88e-05	0.0594442
4318	1	4318	64.5786	9.9e-05	0.0595088
4316	1	4316	64.5487	9.92e-05	0.0595734
4314	1	4314	64.5188	9.93e-05	0.0596379
4312	2	8624	64.4889	9.97e-05	0.0597669
4302	1	4302	64.3393	9.98e-05	0.0598312
4299	1	4299	64.2945	0.0001	0.0598955
4298	1	4298	64.2795	0.000100153	0.0599598
4295	1	4295	64.2346	0.000100317	0.060024
4294	1	4294	64.2197	0.000100481	0.0600882
4293	1	4293	64.2047	0.000100645	0.0601524
4282	1	4282	64.0402	0.000100809	0.0602165
4278	1	4278	63.9804	0.000100972	0.0602804
4276	3	12828	63.9505	0.000101464	0.0604723
4269	1	4269	63.8458	0.000101628	0.0605361
4268	1	4268	63.8308	0.000101792	0.0606
4266	1	4266	63.8009	0.000101956	0.0606638
4264	1	4264	63.771	0.00010212	0.0607275
4253	1	4253	63.6065	0.000102284	0.0607912
4245	1	4245	63.4869	0.000102448	0.0608546
4243	1	4243	63.4569	0.000102612	0.0609181
4236	1	4236	63.3523	0.000102776	0.0609814
4228	2	8456	63.2326	0.000103103	0.0611079
4227	1	4227	63.2177	0.000103267	0.0611711
4223	1	4223	63.1578	0.000103431	0.0612343
4217	1	4217	63.0681	0.000103595	0.0612974
4213	1	4213	63.0083	0.000103759	0.0613604
4211	1	4211	62.9784	0.000103923	0.0614233
4210	1	4210	62.9634	0.000104087	0.0614863
4209	1	4209	62.9484	0.000104251	0.0615493
4208	1	4208	62.9335	0.000104415	0.0616122
4202	1	4202	62.8438	0.000104579	0.061675
4200	1	4200	62.8138	0.000104743	0.0617378
4197	1	4197	62.769	0.000104906	0.0618006
4194	2	8388	62.7241	0.000105234	0.0619261
4191	1	4191	62.6792	0.000105398	0.0619887
4186	2	8372	62.6045	0.000105726	0.062114
4183	1	4183	62.5596	0.00010589	0.0621765
4179	2	8358	62.4998	0.000106218	0.0623015
4178	1	4178	62.4848	0.000106382	0.062364
4172	2	8344	62.3951	0.00010671	0.0624888
4158	1	4158	62.1857	0.000106873	0.062551
4155	1	4155	62.1408	0.000107037	0.0626131
4152	1	4152	62.096	0.000107201	0.0626752
4149	1	4149	62.0511	0.000107365	0.0627373
4148	2	8296	62.0362	0.000107693	0.0628613
4146	1	4146	62.0062	0.000107857	0.0629233
4144	1	4144	61.9763	0.000108021	0.0629853
4143	1	4143	61.9614	0.000108185	0.0630473
4140	1	4140	61.9165	0.000108349	0.0631092
4138	1	4138	61.8866	0.000108513	0.0631711
4137	1	4137	61.8716	0.000108677	0.0632329
4134	1	4134	61.8268	0.00010884	0.0632948
4126	1	4126	61.7071	0.000109004	0.0633565
4124	1	4124	61.6772	0.000109168	0.0634182
4117	1	4117	61.5725	0.000109332	0.0634797
4113	1	4113	61.5127	0.000109496	0.0635412
4112	1	4112	61.4977	0.00010966	0.0636027
4109	2	8218	61.4529	0.000109988	0.0637256
4106	1	4106	61.408	0.000110152	0.0637871
4101	1	4101	61.3332	0.000110316	0.0638484
4099	1	4099	61.3033	0.00011048	0.0639097
4098	1	4098	61.2884	0.000110644	0.063971
4096	1	4096	61.2585	0.000110807	0.0640322
4095	1	4095	61.2435	0.000110971	0.0640935
4093	1	4093	61.2136	0.000111135	0.0641547
4091	1	4091	61.1837	0.000111299	0.0642159
4089	1	4089	61.1538	0.000111463	0.064277
4088	1	4088	61.1388	0.000111627	0.0643382
4087	1	4087	61.1239	0.000111791	0.0643993
4083	1	4083	61.064	0.000111955	0.0644604
4082	1	4082	61.0491	0.000112119	0.0645214
4077	1	4077	60.9743	0.000112283	0.0645824
4076	2	8152	60.9593	0.000112611	0.0647043
4072	1	4072	60.8995	0.000112774	0.0647652
4069	1	4069	60.8547	0.000112938	0.0648261
4067	1	4067	60.8247	0.000113102	0.0648869
4065	1	4065	60.7948	0.000113266	0.0649477
4059	1	4059	60.7051	0.00011343	0.0650084
4057	1	4057	60.6752	0.000113594	0.0650691
4052	2	8104	60.6004	0.000113922	0.0651903
4050	1	4050	60.5705	0.000114086	0.0652508
4047	1	4047	60.5256	0.00011425	0.0653114
4041	1	4041	60.4359	0.000114414	0.0653718
4029	1	4029	60.2564	0.000114578	0.065432
4028	1	4028	60.2415	0.000114741	0.0654923
4027	1	4027	60.2265	0.000114905	0.0655525
4021	1	4021	60.1368	0.000115069	0.0656127
4018	1	4018	60.0919	0.000115233	0.0656727
4017	1	4017	60.077	0.000115397	0.0657328
4013	1	4013	60.0171	0.000115561	0.0657928
4012	1	4012	60.0022	0.000115725	0.0658528
4007	1	4007	59.9274	0.000115889	0.0659128
4005	1	4005	59.8975	0.000116053	0.0659727
4002	2	8004	59.8526	0.000116381	0.0660924
3997	1	3997	59.7778	0.000116545	0.0661521
3991	1	3991	59.6881	0.000116708	0.0662118
3990	1	3990	59.6732	0.000116872	0.0662715
3989	2	7978	59.6582	0.0001172	0.0663908
3987	1	3987	59.6283	0.000117364	0.0664505
3983	1	3983	59.5685	0.000117528	0.06651
3982	1	3982	59.5535	0.000117692	0.0665696
3981	1	3981	59.5386	0.000117856	0.0666291
3975	1	3975	59.4488	0.00011802	0.0666886
3969	1	3969	59.3591	0.000118184	0.0667479
3962	1	3962	59.2544	0.000118348	0.0668072
3959	1	3959	59.2095	0.000118512	0.0668664
3958	2	7916	59.1946	0.000118839	0.0669848
3956	1	3956	59.1647	0.000119003	0.0670439
3952	2	7904	59.1048	0.000119331	0.0671622
3951	1	3951	59.0899	0.000119495	0.0672212
3949	1	3949	59.06	0.000119659	0.0672803
3945	3	11835	59.0001	0.000120151	0.0674573
3943	1	3943	58.9702	0.000120315	0.0675163
3938	1	3938	58.8955	0.000120479	0.0675752
3933	1	3933	58.8207	0.000120642	0.067634
3932	1	3932	58.8057	0.000120806	0.0676928
3931	1	3931	58.7908	0.00012097	0.0677516
3930	1	3930	58.7758	0.000121134	0.0678104
3928	1	3928	58.7459	0.000121298	0.0678691
3927	1	3927	58.7309	0.000121462	0.0679278
3924	1	3924	58.6861	0.000121626	0.0679865
3922	1	3922	58.6562	0.00012179	0.0680452
3918	1	3918	58.5963	0.000121954	0.0681038
3917	1	3917	58.5814	0.000122118	0.0681624
3916	1	3916	58.5664	0.000122282	0.0682209
3915	1	3915	58.5515	0.000122446	0.0682795
3912	1	3912	58.5066	0.000122609	0.068338
3908	1	3908	58.4468	0.000122773	0.0683964
3905	1	3905	58.4019	0.000122937	0.0684548
3904	1	3904	58.387	0.000123101	0.0685132
3903	1	3903	58.372	0.000123265	0.0685716
3898	2	7796	58.2972	0.000123593	0.0686882
3896	1	3896	58.2673	0.000123757	0.0687465
3894	1	3894	58.2374	0.000123921	0.0688047
3891	1	3891	58.1925	0.000124085	0.0688629
3884	2	7768	58.0879	0.000124413	0.0689791
3883	2	7766	58.0729	0.00012474	0.0690952
3881	2	7762	58.043	0.000125068	0.0692113
3880	1	3880	58.028	0.000125232	0.0692693
3878	2	7756	57.9981	0.00012556	0.0693853
3877	1	3877	57.9832	0.000125724	0.0694433
3875	1	3875	57.9533	0.000125888	0.0695012
3873	1	3873	57.9233	0.000126052	0.0695592
3871	1	3871	57.8934	0.000126216	0.0696171
3870	1	3870	57.8785	0.00012638	0.0696749
3869	1	3869	57.8635	0.000126543	0.0697328
3865	1	3865	57.8037	0.000126707	0.0697906
3864	1	3864	57.7887	0.000126871	0.0698484
3863	1	3863	57.7738	0.000127035	0.0699062
3860	1	3860	57.7289	0.000127199	0.0699639
3858	1	3858	57.699	0.000127363	0.0700216
3857	1	3857	57.684	0.000127527	0.0700793
3855	1	3855	57.6541	0.000127691	0.0701369
3851	1	3851	57.5943	0.000127855	0.0701945
3849	1	3849	57.5644	0.000128019	0.0702521
3845	2	7690	57.5046	0.000128347	0.0703671
3844	2	7688	57.4896	0.000128674	0.0704821
3843	2	7686	57.4747	0.000129002	0.070597
3840	1	3840	57.4298	0.000129166	0.0706545
3838	1	3838	57.3999	0.00012933	0.0707119
3837	1	3837	57.3849	0.000129494	0.0707693
3836	1	3836	57.37	0.000129658	0.0708266
3834	1	3834	57.3401	0.000129822	0.070884
3833	1	3833	57.3251	0.000129986	0.0709413
3832	1	3832	57.3102	0.00013015	0.0709986
3829	1	3829	57.2653	0.000130314	0.0710559
3828	1	3828	57.2503	0.000130477	0.0711131
3827	1	3827	57.2354	0.000130641	0.0711703
3826	1	3826	57.2204	0.000130805	0.0712276
3824	1	3824	57.1905	0.000130969	0.0712848
3823	1	3823	57.1756	0.000131133	0.0713419
3822	1	3822	57.1606	0.000131297	0.0713991
3820	1	3820	57.1307	0.000131461	0.0714562
3814	1	3814	57.041	0.000131625	0.0715133
3810	1	3810	56.9811	0.000131789	0.0715702
3808	1	3808	56.9512	0.000131953	0.0716272
3807	1	3807	56.9363	0.000132117	0.0716841
3805	2	7610	56.9064	0.000132444	0.0717979
3804	1	3804	56.8914	0.000132608	0.0718548
3799	1	3799	56.8166	0.000132772	0.0719117
3795	1	3795	56.7568	0.000132936	0.0719684
3783	1	3783	56.5773	0.0001331	0.072025
3780	2	7560	56.5325	0.000133428	0.0721381
3767	1	3767	56.338	0.000133592	0.0721944
3764	2	7528	56.2932	0.00013392	0.072307
3761	1	3761	56.2483	0.000134084	0.0723632
3759	1	3759	56.2184	0.000134248	0.0724194
3758	2	7516	56.2034	0.000134575	0.0725319
3755	2	7510	56.1586	0.000134903	0.0726442
3753	1	3753	56.1287	0.000135067	0.0727003
3752	1	3752	56.1137	0.000135231	0.0727564
3750	1	3750	56.0838	0.000135395	0.0728125
3745	1	3745	56.009	0.000135559	0.0728685
3742	1	3742	55.9641	0.000135723	0.0729245
3740	1	3740	55.9342	0.000135887	0.0729804
3739	1	3739	55.9193	0.000136051	0.0730363
3736	1	3736	55.8744	0.000136215	0.0730922
3730	1	3730	55.7847	0.000136378	0.073148
3726	1	3726	55.7249	0.000136542	0.0732037
3721	1	3721	55.6501	0.000136706	0.0732594
3719	1	3719	55.6202	0.00013687	0.073315
3718	1	3718	55.6052	0.000137034	0.0733706
3712	1	3712	55.5155	0.000137198	0.0734261
3711	1	3711	55.5005	0.000137362	0.0734816
3709	1	3709	55.4706	0.000137526	0.0735371
3701	1	3701	55.351	0.00013769	0.0735924
3698	1	3698	55.3061	0.000137854	0.0736477
3697	1	3697	55.2911	0.000138018	0.073703
3692	2	7384	55.2164	0.000138345	0.0738134
3688	1	3688	55.1565	0.000138509	0.0738686
3680	2	7360	55.0369	0.000138837	0.0739787
3679	2	7358	55.0219	0.000139165	0.0740887
3678	1	3678	55.007	0.000139329	0.0741437
3675	1	3675	54.9621	0.000139493	0.0741987
3674	2	7348	54.9472	0.000139821	0.0743086
3671	1	3671	54.9023	0.000139985	0.0743635
3666	2	7332	54.8275	0.000140312	0.0744731
3664	1	3664	54.7976	0.000140476	0.0745279
3660	1	3660	54.7378	0.00014064	0.0745827
3657	1	3657	54.6929	0.000140804	0.0746374
3656	3	10968	54.678	0.000141296	0.0748014
3655	1	3655	54.663	0.00014146	0.0748561
3652	1	3652	54.6181	0.000141624	0.0749107
3649	1	3649	54.5733	0.000141788	0.0749653
3648	1	3648	54.5583	0.000141952	0.0750198
3644	1	3644	54.4985	0.000142115	0.0750743
3643	1	3643	54.4835	0.000142279	0.0751288
3637	1	3637	54.3938	0.000142443	0.0751832
3636	2	7272	54.3788	0.000142771	0.075292
3632	1	3632	54.319	0.000142935	0.0753463
3631	1	3631	54.3041	0.000143099	0.0754006
3629	1	3629	54.2742	0.000143263	0.0754548
3626	1	3626	54.2293	0.000143427	0.0755091
3623	1	3623	54.1844	0.000143591	0.0755633
3622	2	7244	54.1695	0.000143919	0.0756716
3621	1	3621	54.1545	0.000144082	0.0757258
3619	1	3619	54.1246	0.000144246	0.0757799
3617	2	7234	54.0947	0.000144574	0.0758881
3615	1	3615	54.0648	0.000144738	0.0759421
3614	1	3614	54.0498	0.000144902	0.0759962
3613	1	3613	54.0349	0.000145066	0.0760502
3608	1	3608	53.9601	0.00014523	0.0761042
3604	1	3604	53.9003	0.000145394	0.0761581
3603	1	3603	53.8853	0.000145558	0.076212
3602	1	3602	53.8704	0.000145722	0.0762658
3600	2	7200	53.8404	0.000146049	0.0763735
3599	1	3599	53.8255	0.000146213	0.0764273
3598	1	3598	53.8105	0.000146377	0.0764812
3596	1	3596	53.7806	0.000146541	0.0765349
3594	1	3594	53.7507	0.000146705	0.0765887
3593	1	3593	53.7358	0.000146869	0.0766424
3592	1	3592	53.7208	0.000147033	0.0766961
3591	1	3591	53.7058	0.000147197	0.0767498
3588	3	10764	53.661	0.000147689	0.0769108
3585	2	7170	53.6161	0.000148016	0.0770181
3584	1	3584	53.6011	0.00014818	0.0770717
3580	1	3580	53.5413	0.000148344	0.0771252
3578	1	3578	53.5114	0.000148508	0.0771787
3576	1	3576	53.4815	0.000148672	0.0772322
3574	2	7148	53.4516	0.000149	0.0773391
3572	3	10716	53.4217	0.000149492	0.0774994
3571	1	3571	53.4067	0.000149656	0.0775528
3569	1	3569	53.3768	0.00014982	0.0776061
3566	1	3566	53.3319	0.000149983	0.0776595
3565	1	3565	53.317	0.000150147	0.0777128
3564	1	3564	53.302	0.000150311	0.0777661
3562	1	3562	53.2721	0.000150475	0.0778194
3561	1	3561	53.2572	0.000150639	0.0778726
3560	2	7120	53.2422	0.000150967	0.0779791
3558	1	3558	53.2123	0.000151131	0.0780323
3557	2	7114	53.1973	0.000151459	0.0781387
3554	2	7108	53.1525	0.000151787	0.078245
3550	1	3550	53.0927	0.00015195	0.0782981
3549	2	7098	53.0777	0.000152278	0.0784043
3545	1	3545	53.0179	0.000152442	0.0784573
3538	1	3538	52.9132	0.000152606	0.0785102
3534	2	7068	52.8534	0.000152934	0.0786159
3533	1	3533	52.8384	0.000153098	0.0786687
3531	3	10593	52.8085	0.00015359	0.0788272
3529	3	10587	52.7786	0.000154081	0.0789855
3528	1	3528	52.7636	0.000154245	0.0790383
3526	1	3526	52.7337	0.000154409	0.079091
3525	1	3525	52.7188	0.000154573	0.0791437
3524	1	3524	52.7038	0.000154737	0.0791964
3518	1	3518	52.6141	0.000154901	0.079249
3515	3	10545	52.5692	0.000155393	0.0794068
3514	1	3514	52.5543	0.000155557	0.0794593
3512	1	3512	52.5243	0.000155721	0.0795118
3510	1	3510	52.4944	0.000155884	0.0795643
3505	1	3505	52.4197	0.000156048	0.0796167
3497	1	3497	52.3	0.000156212	0.079669
3494	1	3494	52.2551	0.000156376	0.0797213
3492	1	3492	52.2252	0.00015654	0.0797735
3491	1	3491	52.2103	0.000156704	0.0798257
3487	2	6974	52.1504	0.000157032	0.07993
3483	1	3483	52.0906	0.000157196	0.0799821
3481	2	6962	52.0607	0.000157524	0.0800862
3480	2	6960	52.0458	0.000157851	0.0801903
3474	1	3474	51.956	0.000158015	0.0802423
3473	2	6946	51.9411	0.000158343	0.0803462
3465	1	3465	51.8214	0.000158507	0.080398
3463	1	3463	51.7915	0.000158671	0.0804498
3462	2	6924	51.7766	0.000158999	0.0805533
3461	1	3461	51.7616	0.000159163	0.0806051
3460	1	3460	51.7466	0.000159327	0.0806569
3456	2	6912	51.6868	0.000159655	0.0807602
3454	1	3454	51.6569	0.000159818	0.0808119
3444	1	3444	51.5074	0.000159982	0.0808634
3442	1	3442	51.4774	0.000160146	0.0809149
3436	1	3436	51.3877	0.00016031	0.0809663
3435	1	3435	51.3728	0.000160474	0.0810176
3434	1	3434	51.3578	0.000160638	0.081069
3427	1	3427	51.2531	0.000160802	0.0811202
3424	1	3424	51.2082	0.000160966	0.0811714
3423	1	3423	51.1933	0.00016113	0.0812226
3418	1	3418	51.1185	0.000161294	0.0812738
3417	1	3417	51.1036	0.000161458	0.0813249
3416	1	3416	51.0886	0.000161622	0.081376
3415	1	3415	51.0736	0.000161785	0.081427
3414	1	3414	51.0587	0.000161949	0.0814781
3413	1	3413	51.0437	0.000162113	0.0815291
3409	1	3409	50.9839	0.000162277	0.0815801
3406	1	3406	50.939	0.000162441	0.0816311
3405	2	6810	50.9241	0.000162769	0.0817329
3404	1	3404	50.9091	0.000162933	0.0817838
3401	1	3401	50.8643	0.000163097	0.0818347
3398	1	3398	50.8194	0.000163261	0.0818855
3395	1	3395	50.7745	0.000163425	0.0819363
3394	1	3394	50.7596	0.000163589	0.081987
3393	1	3393	50.7446	0.000163752	0.0820378
3392	1	3392	50.7297	0.000163916	0.0820885
3390	1	3390	50.6997	0.00016408	0.0821392
3389	1	3389	50.6848	0.000164244	0.0821899
3388	1	3388	50.6698	0.000164408	0.0822406
3384	1	3384	50.61	0.000164572	0.0822912
3382	1	3382	50.5801	0.000164736	0.0823417
3378	1	3378	50.5203	0.0001649	0.0823923
3377	1	3377	50.5053	0.000165064	0.0824428
3376	1	3376	50.4904	0.000165228	0.0824933
3373	1	3373	50.4455	0.000165392	0.0825437
3369	1	3369	50.3857	0.000165556	0.0825941
3366	2	6732	50.3408	0.000165883	0.0826948
3363	1	3363	50.2959	0.000166047	0.0827451
3362	1	3362	50.281	0.000166211	0.0827954
3361	1	3361	50.266	0.000166375	0.0828456
3359	1	3359	50.2361	0.000166539	0.0828959
3357	1	3357	50.2062	0.000166703	0.0829461
3356	3	10068	50.1913	0.000167195	0.0830966
3355	1	3355	50.1763	0.000167359	0.0831468
3354	1	3354	50.1613	0.000167523	0.083197
3350	2	6700	50.1015	0.00016785	0.0832972
3347	2	6694	50.0567	0.000168178	0.0833973
3346	1	3346	50.0417	0.000168342	0.0834473
3344	2	6688	50.0118	0.00016867	0.0835474
3343	1	3343	49.9968	0.000168834	0.0835973
3342	1	3342	49.9819	0.000168998	0.0836473
3340	1	3340	49.952	0.000169162	0.0836973
3338	4	13352	49.9221	0.000169817	0.083897
3337	1	3337	49.9071	0.000169981	0.0839469
3333	1	3333	49.8473	0.000170145	0.0839967
3331	2	6662	49.8174	0.000170473	0.0840964
3325	2	6650	49.7276	0.000170801	0.0841958
3324	1	3324	49.7127	0.000170965	0.0842455
3322	1	3322	49.6828	0.000171129	0.0842952
3318	2	6636	49.6229	0.000171457	0.0843945
3315	1	3315	49.5781	0.00017162	0.084444
3314	1	3314	49.5631	0.000171784	0.0844936
3312	2	6624	49.5332	0.000172112	0.0845927
3311	2	6622	49.5182	0.00017244	0.0846917
3309	2	6618	49.4883	0.000172768	0.0847907
3307	1	3307	49.4584	0.000172932	0.0848401
3306	2	6612	49.4435	0.00017326	0.084939
3302	1	3302	49.3836	0.000173424	0.0849884
3300	1	3300	49.3537	0.000173587	0.0850378
3299	2	6598	49.3388	0.000173915	0.0851364
3298	2	6596	49.3238	0.000174243	0.0852351
3297	2	6594	49.3089	0.000174571	0.0853337
3296	1	3296	49.2939	0.000174735	0.085383
3294	1	3294	49.264	0.000174899	0.0854323
3286	1	3286	49.1444	0.000175063	0.0854814
3283	3	9849	49.0995	0.000175554	0.0856287
3282	3	9846	49.0845	0.000176046	0.085776
3279	1	3279	49.0397	0.00017621	0.085825
3276	1	3276	48.9948	0.000176374	0.085874
3275	2	6550	48.9798	0.000176702	0.085972
3272	3	9816	48.935	0.000177194	0.0861188
3271	1	3271	48.92	0.000177358	0.0861677
3269	1	3269	48.8901	0.000177521	0.0862166
3268	1	3268	48.8752	0.000177685	0.0862654
3267	1	3267	48.8602	0.000177849	0.0863143
3265	2	6530	48.8303	0.000178177	0.086412
3263	1	3263	48.8004	0.000178341	0.0864608
3262	1	3262	48.7854	0.000178505	0.0865095
3261	2	6522	48.7705	0.000178833	0.0866071
3260	1	3260	48.7555	0.000178997	0.0866558
3259	1	3259	48.7406	0.000179161	0.0867046
3257	1	3257	48.7106	0.000179325	0.0867533
3256	1	3256	48.6957	0.000179488	0.086802
3255	2	6510	48.6807	0.000179816	0.0868994
3254	1	3254	48.6658	0.00017998	0.086948
3252	1	3252	48.6359	0.000180144	0.0869967
3251	1	3251	48.6209	0.000180308	0.0870453
3250	1	3250	48.606	0.000180472	0.0870939
3249	1	3249	48.591	0.000180636	0.0871425
3244	1	3244	48.5162	0.0001808	0.087191
3242	1	3242	48.4863	0.000180964	0.0872395
3240	1	3240	48.4564	0.000181128	0.0872879
3238	1	3238	48.4265	0.000181292	0.0873364
3237	3	9711	48.4115	0.000181783	0.0874816
3235	1	3235	48.3816	0.000181947	0.08753
3232	1	3232	48.3368	0.000182111	0.0875783
3231	1	3231	48.3218	0.000182275	0.0876266
3230	1	3230	48.3068	0.000182439	0.0876749
3227	2	6454	48.262	0.000182767	0.0877715
3225	1	3225	48.2321	0.000182931	0.0878197
3218	1	3218	48.1274	0.000183095	0.0878678
3216	1	3216	48.0975	0.000183259	0.0879159
3215	1	3215	48.0825	0.000183422	0.087964
3214	1	3214	48.0675	0.000183586	0.0880121
3208	3	9624	47.9778	0.000184078	0.088156
3207	1	3207	47.9629	0.000184242	0.088204
3206	1	3206	47.9479	0.000184406	0.0882519
3205	1	3205	47.9329	0.00018457	0.0882998
3198	1	3198	47.8283	0.000184734	0.0883477
3197	2	6394	47.8133	0.000185062	0.0884433
3195	1	3195	47.7834	0.000185225	0.0884911
3194	1	3194	47.7684	0.000185389	0.0885389
3193	2	6386	47.7535	0.000185717	0.0886344
3192	1	3192	47.7385	0.000185881	0.0886821
3188	2	6376	47.6787	0.000186209	0.0887775
3187	1	3187	47.6637	0.000186373	0.0888251
3186	2	6372	47.6488	0.000186701	0.0889204
3182	1	3182	47.589	0.000186865	0.088968
3180	2	6360	47.5591	0.000187192	0.0890631
3179	1	3179	47.5441	0.000187356	0.0891107
3177	3	9531	47.5142	0.000187848	0.0892532
3176	2	6352	47.4992	0.000188176	0.0893482
3175	1	3175	47.4843	0.00018834	0.0893957
3172	2	6344	47.4394	0.000188668	0.0894906
3171	1	3171	47.4245	0.000188832	0.089538
3170	2	6340	47.4095	0.000189159	0.0896328
3169	1	3169	47.3945	0.000189323	0.0896802
3168	2	6336	47.3796	0.000189651	0.089775
3167	3	9501	47.3646	0.000190143	0.0899171
3166	1	3166	47.3497	0.000190307	0.0899644
3164	1	3164	47.3198	0.000190471	0.0900117
3162	1	3162	47.2899	0.000190635	0.090059
3160	1	3160	47.2599	0.000190799	0.0901063
3159	1	3159	47.245	0.000190963	0.0901535
3156	1	3156	47.2001	0.000191126	0.0902007
3154	1	3154	47.1702	0.00019129	0.0902479
3153	1	3153	47.1553	0.000191454	0.0902951
3148	2	6296	47.0805	0.000191782	0.0903892
3145	3	9435	47.0356	0.000192274	0.0905303
3143	1	3143	47.0057	0.000192438	0.0905773
3142	1	3142	46.9907	0.000192602	0.0906243
3139	2	6278	46.9459	0.00019293	0.0907182
3138	1	3138	46.9309	0.000193093	0.0907651
3137	1	3137	46.916	0.000193257	0.0908121
3136	1	3136	46.901	0.000193421	0.090859
3134	1	3134	46.8711	0.000193585	0.0909058
3131	3	9393	46.8262	0.000194077	0.0910463
3129	1	3129	46.7963	0.000194241	0.0910931
3126	1	3126	46.7514	0.000194405	0.0911399
3124	1	3124	46.7215	0.000194569	0.0911866
3122	1	3122	46.6916	0.000194733	0.0912333
3121	1	3121	46.6767	0.000194897	0.0912799
3118	1	3118	46.6318	0.00019506	0.0913266
3116	2	6232	46.6019	0.000195388	0.0914198
3114	1	3114	46.572	0.000195552	0.0914664
3113	2	6226	46.557	0.00019588	0.0915595
3112	1	3112	46.5421	0.000196044	0.091606
3111	1	3111	46.5271	0.000196208	0.0916525
3110	1	3110	46.5122	0.000196372	0.091699
3109	3	9327	46.4972	0.000196864	0.0918385
3105	1	3105	46.4374	0.000197027	0.091885
3104	1	3104	46.4224	0.000197191	0.0919314
3102	1	3102	46.3925	0.000197355	0.0919778
3101	1	3101	46.3776	0.000197519	0.0920242
3100	2	6200	46.3626	0.000197847	0.0921169
3098	3	9294	46.3327	0.000198339	0.0922559
3095	1	3095	46.2878	0.000198503	0.0923022
3094	2	6188	46.2729	0.000198831	0.0923947
3091	3	9273	46.228	0.000199322	0.0925334
3089	1	3089	46.1981	0.000199486	0.0925796
3085	1	3085	46.1383	0.00019965	0.0926257
3081	4	12324	46.0784	0.000200306	0.0928101
3080	1	3080	46.0635	0.00020047	0.0928561
3079	1	3079	46.0485	0.000200634	0.0929022
3078	1	3078	46.0336	0.000200798	0.0929482
3077	1	3077	46.0186	0.000200961	0.0929942
3076	1	3076	46.0037	0.000201125	0.0930402
3075	3	9225	45.9887	0.000201617	0.0931782
3074	1	3074	45.9738	0.000201781	0.0932242
3073	3	9219	45.9588	0.000202273	0.093362
3070	1	3070	45.9139	0.000202437	0.093408
3069	3	9207	45.899	0.000202928	0.0935457
3068	1	3068	45.884	0.000203092	0.0935915
3065	1	3065	45.8392	0.000203256	0.0936374
3064	2	6128	45.8242	0.000203584	0.093729
3063	1	3063	45.8092	0.000203748	0.0937748
3061	1	3061	45.7793	0.000203912	0.0938206
3060	1	3060	45.7644	0.000204076	0.0938664
3057	1	3057	45.7195	0.00020424	0.0939121
3056	1	3056	45.7046	0.000204404	0.0939578
3055	1	3055	45.6896	0.000204568	0.0940035
3054	1	3054	45.6746	0.000204732	0.0940492
3053	3	9159	45.6597	0.000205223	0.0941861
3052	1	3052	45.6447	0.000205387	0.0942318
3051	1	3051	45.6298	0.000205551	0.0942774
3048	1	3048	45.5849	0.000205715	0.094323
3047	2	6094	45.57	0.000206043	0.0944141
3045	1	3045	45.54	0.000206207	0.0944597
3044	1	3044	45.5251	0.000206371	0.0945052
3037	2	6074	45.4204	0.000206699	0.0945961
3035	3	9105	45.3905	0.00020719	0.0947322
3034	1	3034	45.3755	0.000207354	0.0947776
3032	1	3032	45.3456	0.000207518	0.0948229
3030	1	3030	45.3157	0.000207682	0.0948683
3027	1	3027	45.2708	0.000207846	0.0949135
3025	1	3025	45.2409	0.00020801	0.0949588
3023	1	3023	45.211	0.000208174	0.095004
3022	1	3022	45.1961	0.000208338	0.0950492
3021	1	3021	45.1811	0.000208502	0.0950944
3020	1	3020	45.1661	0.000208666	0.0951395
3017	3	9051	45.1213	0.000209157	0.0952749
3014	1	3014	45.0764	0.000209321	0.09532
3012	3	9036	45.0465	0.000209813	0.0954551
3011	2	6022	45.0315	0.000210141	0.0955452
3008	1	3008	44.9867	0.000210305	0.0955902
3006	1	3006	44.9568	0.000210469	0.0956351
3005	1	3005	44.9418	0.000210633	0.0956801
3004	1	3004	44.9269	0.000210796	0.095725
3003	3	9009	44.9119	0.000211288	0.0958597
3001	1	3001	44.882	0.000211452	0.0959046
3000	1	3000	44.867	0.000211616	0.0959495
2997	1	2997	44.8222	0.00021178	0.0959943
2996	1	2996	44.8072	0.000211944	0.0960391
2994	1	2994	44.7773	0.000212108	0.0960839
2991	2	5982	44.7324	0.000212436	0.0961733
2990	1	2990	44.7175	0.0002126	0.0962181
2989	1	2989	44.7025	0.000212763	0.0962628
2988	2	5976	44.6876	0.000213091	0.0963521
2987	2	5974	44.6726	0.000213419	0.0964415
2986	1	2986	44.6577	0.000213583	0.0964861
2985	1	2985	44.6427	0.000213747	0.0965308
2983	5	14915	44.6128	0.000214567	0.0967538
2981	1	2981	44.5829	0.00021473	0.0967984
2980	1	2980	44.5679	0.000214894	0.096843
2979	1	2979	44.553	0.000215058	0.0968875
2974	1	2974	44.4782	0.000215222	0.096932
2973	1	2973	44.4632	0.000215386	0.0969765
2972	1	2972	44.4483	0.00021555	0.0970209
2971	1	2971	44.4333	0.000215714	0.0970654
2970	1	2970	44.4184	0.000215878	0.0971098
2967	1	2967	44.3735	0.000216042	0.0971542
2966	3	8898	44.3585	0.000216534	0.0972872
2965	4	11860	44.3436	0.000217189	0.0974646
2964	3	8892	44.3286	0.000217681	0.0975976
2962	1	2962	44.2987	0.000217845	0.0976419
2960	1	2960	44.2688	0.000218009	0.0976862
2959	2	5918	44.2539	0.000218337	0.0977747
2957	1	2957	44.2239	0.000218501	0.0978189
2955	2	5910	44.194	0.000218828	0.0979073
2953	1	2953	44.1641	0.000218992	0.0979514
2951	1	2951	44.1342	0.000219156	0.0979956
2950	1	2950	44.1192	0.00021932	0.0980397
2949	1	2949	44.1043	0.000219484	0.0980838
2948	1	2948	44.0893	0.000219648	0.0981279
2946	2	5892	44.0594	0.000219976	0.098216
2945	1	2945	44.0445	0.00022014	0.0982601
2944	4	11776	44.0295	0.000220795	0.0984362
2943	1	2943	44.0146	0.000220959	0.0984802
2942	2	5884	43.9996	0.000221287	0.0985682
2941	1	2941	43.9846	0.000221451	0.0986122
2939	1	2939	43.9547	0.000221615	0.0986561
2938	1	2938	43.9398	0.000221779	0.0987001
2936	2	5872	43.9099	0.000222107	0.0987879
2935	1	2935	43.8949	0.000222271	0.0988318
2930	1	2930	43.8201	0.000222435	0.0988756
2928	1	2928	43.7902	0.000222598	0.0989194
2926	2	5852	43.7603	0.000222926	0.0990069
2924	1	2924	43.7304	0.00022309	0.0990506
2921	1	2921	43.6855	0.000223254	0.0990943
2919	1	2919	43.6556	0.000223418	0.099138
2918	1	2918	43.6407	0.000223582	0.0991816
2916	1	2916	43.6108	0.000223746	0.0992252
2915	3	8745	43.5958	0.000224238	0.099356
2914	1	2914	43.5808	0.000224402	0.0993996
2912	1	2912	43.5509	0.000224565	0.0994432
2911	1	2911	43.536	0.000224729	0.0994867
2910	3	8730	43.521	0.000225221	0.0996173
2908	3	8724	43.4911	0.000225713	0.0997477
2907	1	2907	43.4762	0.000225877	0.0997912
2906	1	2906	43.4612	0.000226041	0.0998347
2903	2	5806	43.4163	0.000226369	0.0999215
2902	1	2902	43.4014	0.000226532	0.0999649
2899	1	2899	43.3565	0.000226696	0.100008
2898	1	2898	43.3416	0.00022686	0.100052
2897	1	2897	43.3266	0.000227024	0.100095
2896	2	5792	43.3116	0.000227352	0.100182
2895	2	5790	43.2967	0.00022768	0.100268
2894	1	2894	43.2817	0.000227844	0.100311
2893	2	5786	43.2668	0.000228172	0.100398
2892	1	2892	43.2518	0.000228336	0.100441
2890	2	5780	43.2219	0.000228663	0.100528
2889	1	2889	43.207	0.000228827	0.100571
2887	1	2887	43.177	0.000228991	0.100614
2885	1	2885	43.1471	0.000229155	0.100657
2882	1	2882	43.1023	0.000229319	0.1007
2880	2	5760	43.0724	0.000229647	0.100786
2879	2	5758	43.0574	0.000229975	0.100873
2877	4	11508	43.0275	0.00023063	0.101045
2874	1	2874	42.9826	0.000230794	0.101088
2870	1	2870	42.9228	0.000230958	0.101131
2869	2	5738	42.9078	0.000231286	0.101216
2868	2	5736	42.8929	0.000231614	0.101302
2866	1	2866	42.863	0.000231778	0.101345
2864	1	2864	42.8331	0.000231942	0.101388
2860	1	2860	42.7732	0.000232106	0.101431
2859	1	2859	42.7583	0.000232269	0.101473
2857	2	5714	42.7284	0.000232597	0.101559
2855	1	2855	42.6985	0.000232761	0.101602
2853	1	2853	42.6685	0.000232925	0.101644
2851	2	5702	42.6386	0.000233253	0.101729
2846	4	11384	42.5639	0.000233909	0.1019
2845	1	2845	42.5489	0.000234073	0.101942
2844	2	5688	42.5339	0.0002344	0.102027
2842	1	2842	42.504	0.000234564	0.10207
2841	1	2841	42.4891	0.000234728	0.102112
2840	1	2840	42.4741	0.000234892	0.102155
2839	3	8517	42.4592	0.000235384	0.102282
2835	1	2835	42.3993	0.000235548	0.102325
2834	1	2834	42.3844	0.000235712	0.102367
2833	2	5666	42.3694	0.00023604	0.102452
2832	1	2832	42.3545	0.000236203	0.102494
2831	1	2831	42.3395	0.000236367	0.102536
2830	1	2830	42.3246	0.000236531	0.102579
2828	1	2828	42.2947	0.000236695	0.102621
2827	1	2827	42.2797	0.000236859	0.102663
2824	1	2824	42.2348	0.000237023	0.102706
2821	1	2821	42.19	0.000237187	0.102748
2820	3	8460	42.175	0.000237679	0.102874
2819	1	2819	42.1601	0.000237843	0.102916
2818	3	8454	42.1451	0.000238334	0.103043
2814	2	5628	42.0853	0.000238662	0.103127
2813	1	2813	42.0703	0.000238826	0.103169
2812	2	5624	42.0554	0.000239154	0.103253
2808	1	2808	41.9955	0.000239318	0.103295
2807	1	2807	41.9806	0.000239482	0.103337
2805	2	5610	41.9507	0.00023981	0.103421
2804	2	5608	41.9357	0.000240137	0.103505
2803	1	2803	41.9208	0.000240301	0.103547
2802	1	2802	41.9058	0.000240465	0.103589
2801	2	5602	41.8909	0.000240793	0.103673
2799	1	2799	41.8609	0.000240957	0.103714
2797	1	2797	41.831	0.000241121	0.103756
2796	1	2796	41.8161	0.000241285	0.103798
2794	2	5588	41.7862	0.000241613	0.103882
2793	1	2793	41.7712	0.000241777	0.103923
2788	1	2788	41.6964	0.000241941	0.103965
2787	1	2787	41.6815	0.000242104	0.104007
2786	1	2786	41.6665	0.000242268	0.104048
2784	2	5568	41.6366	0.000242596	0.104132
2783	2	5566	41.6217	0.000242924	0.104215
2782	1	2782	41.6067	0.000243088	0.104257
2780	2	5560	41.5768	0.000243416	0.10434
2779	2	5558	41.5618	0.000243744	0.104423
2778	2	5556	41.5469	0.000244071	0.104506
2777	2	5554	41.5319	0.000244399	0.104589
2774	2	5548	41.4871	0.000244727	0.104672
2773	1	2773	41.4721	0.000244891	0.104713
2770	1	2770	41.4272	0.000245055	0.104755
2769	1	2769	41.4123	0.000245219	0.104796
2768	1	2768	41.3973	0.000245383	0.104838
2767	2	5534	41.3824	0.000245711	0.10492
2765	1	2765	41.3524	0.000245875	0.104962
2764	1	2764	41.3375	0.000246038	0.105003
2763	2	5526	41.3225	0.000246366	0.105086
2762	2	5524	41.3076	0.000246694	0.105168
2759	1	2759	41.2627	0.000246858	0.10521
2758	2	5516	41.2478	0.000247186	0.105292
2757	3	8271	41.2328	0.000247678	0.105416
2756	3	8268	41.2178	0.000248169	0.10554
2755	1	2755	41.2029	0.000248333	0.105581
2754	4	11016	41.1879	0.000248989	0.105745
2753	2	5506	41.173	0.000249317	0.105828
2747	2	5494	41.0832	0.000249645	0.10591
2745	2	5490	41.0533	0.000249972	0.105992
2744	3	8232	41.0384	0.000250464	0.106115
2741	2	5482	40.9935	0.000250792	0.106197
2740	2	5480	40.9786	0.00025112	0.106279
2739	2	5478	40.9636	0.000251448	0.106361
2738	1	2738	40.9486	0.000251612	0.106402
2737	1	2737	40.9337	0.000251776	0.106443
2736	1	2736	40.9187	0.000251939	0.106484
2735	1	2735	40.9038	0.000252103	0.106525
2734	1	2734	40.8888	0.000252267	0.106566
2733	1	2733	40.8739	0.000252431	0.106607
2732	1	2732	40.8589	0.000252595	0.106647
2731	1	2731	40.844	0.000252759	0.106688
2730	2	5460	40.829	0.000253087	0.10677
2729	1	2729	40.814	0.000253251	0.106811
2728	2	5456	40.7991	0.000253579	0.106892
2727	2	5454	40.7841	0.000253906	0.106974
2724	1	2724	40.7393	0.00025407	0.107015
2723	2	5446	40.7243	0.000254398	0.107096
2722	1	2722	40.7094	0.000254562	0.107137
2721	1	2721	40.6944	0.000254726	0.107178
2719	2	5438	40.6645	0.000255054	0.107259
2718	1	2718	40.6495	0.000255218	0.107299
2717	1	2717	40.6346	0.000255382	0.10734
2716	2	5432	40.6196	0.00025571	0.107421
2714	1	2714	40.5897	0.000255873	0.107462
2713	3	8139	40.5748	0.000256365	0.107584
2712	1	2712	40.5598	0.000256529	0.107624
2711	2	5422	40.5448	0.000256857	0.107705
2710	1	2710	40.5299	0.000257021	0.107746
2706	1	2706	40.4701	0.000257185	0.107786
2705	1	2705	40.4551	0.000257349	0.107827
2704	1	2704	40.4402	0.000257513	0.107867
2703	1	2703	40.4252	0.000257677	0.107908
2702	1	2702	40.4102	0.00025784	0.107948
2700	1	2700	40.3803	0.000258004	0.107988
2699	1	2699	40.3654	0.000258168	0.108029
2698	1	2698	40.3504	0.000258332	0.108069
2695	2	5390	40.3056	0.00025866	0.10815
2694	2	5388	40.2906	0.000258988	0.10823
2693	1	2693	40.2756	0.000259152	0.108271
2692	2	5384	40.2607	0.00025948	0.108351
2690	2	5380	40.2308	0.000259807	0.108432
2689	2	5378	40.2158	0.000260135	0.108512
2687	4	10748	40.1859	0.000260791	0.108673
2686	2	5372	40.171	0.000261119	0.108753
2685	1	2685	40.156	0.000261283	0.108793
2684	2	5368	40.141	0.000261611	0.108874
2682	3	8046	40.1111	0.000262102	0.108994
2679	1	2679	40.0663	0.000262266	0.109034
2678	1	2678	40.0513	0.00026243	0.109074
2677	1	2677	40.0363	0.000262594	0.109114
2676	1	2676	40.0214	0.000262758	0.109154
2675	6	16050	40.0064	0.000263741	0.109394
2674	1	2674	39.9915	0.000263905	0.109434
2673	1	2673	39.9765	0.000264069	0.109474
2672	1	2672	39.9616	0.000264233	0.109514
2670	2	5340	39.9317	0.000264561	0.109594
2669	1	2669	39.9167	0.000264725	0.109634
2668	1	2668	39.9017	0.000264889	0.109674
2666	1	2666	39.8718	0.000265053	0.109714
2665	1	2665	39.8569	0.000265217	0.109753
2664	1	2664	39.8419	0.000265381	0.109793
2663	1	2663	39.827	0.000265545	0.109833
2662	1	2662	39.812	0.000265708	0.109873
2661	1	2661	39.7971	0.000265872	0.109913
2660	1	2660	39.7821	0.000266036	0.109952
2659	3	7977	39.7671	0.000266528	0.110072
2656	1	2656	39.7223	0.000266692	0.110112
2655	2	5310	39.7073	0.00026702	0.110191
2654	2	5308	39.6924	0.000267348	0.11027
2653	1	2653	39.6774	0.000267512	0.11031
2652	1	2652	39.6625	0.000267675	0.11035
2651	1	2651	39.6475	0.000267839	0.110389
2649	1	2649	39.6176	0.000268003	0.110429
2646	3	7938	39.5727	0.000268495	0.110548
2645	1	2645	39.5578	0.000268659	0.110587
2643	3	7929	39.5279	0.000269151	0.110706
2642	3	7926	39.5129	0.000269642	0.110824
2641	2	5282	39.4979	0.00026997	0.110903
2640	1	2640	39.483	0.000270134	0.110943
2638	3	7914	39.4531	0.000270626	0.111061
2637	1	2637	39.4381	0.00027079	0.111101
2636	1	2636	39.4232	0.000270954	0.11114
2635	2	5270	39.4082	0.000271282	0.111219
2634	1	2634	39.3933	0.000271446	0.111258
2633	2	5266	39.3783	0.000271773	0.111337
2632	2	5264	39.3633	0.000272101	0.111416
2631	2	5262	39.3484	0.000272429	0.111494
2630	1	2630	39.3334	0.000272593	0.111534
2629	2	5258	39.3185	0.000272921	0.111612
2628	2	5256	39.3035	0.000273249	0.111691
2627	1	2627	39.2886	0.000273413	0.11173
2626	2	5252	39.2736	0.00027374	0.111809
2625	1	2625	39.2587	0.000273904	0.111848
2624	1	2624	39.2437	0.000274068	0.111887
2623	2	5246	39.2287	0.000274396	0.111966
2622	1	2622	39.2138	0.00027456	0.112005
2620	1	2620	39.1839	0.000274724	0.112044
2619	3	7857	39.1689	0.000275216	0.112162
2618	1	2618	39.154	0.000275379	0.112201
2616	3	7848	39.1241	0.000275871	0.112318
2615	1	2615	39.1091	0.000276035	0.112357
2614	2	5228	39.0941	0.000276363	0.112436
2613	2	5226	39.0792	0.000276691	0.112514
2612	2	5224	39.0642	0.000277019	0.112592
2611	3	7833	39.0493	0.00027751	0.112709
2610	2	5220	39.0343	0.000277838	0.112787
2609	1	2609	39.0194	0.000278002	0.112826
2607	1	2607	38.9895	0.000278166	0.112865
2604	1	2604	38.9446	0.00027833	0.112904
2603	1	2603	38.9296	0.000278494	0.112943
2601	2	5202	38.8997	0.000278822	0.113021
2599	1	2599	38.8698	0.000278986	0.11306
2598	2	5196	38.8549	0.000279313	0.113137
2597	3	7791	38.8399	0.000279805	0.113254
2595	1	2595	38.81	0.000279969	0.113293
2594	1	2594	38.795	0.000280133	0.113331
2592	3	7776	38.7651	0.000280625	0.113448
2591	2	5182	38.7502	0.000280953	0.113525
2590	1	2590	38.7352	0.000281117	0.113564
2588	3	7764	38.7053	0.000281608	0.11368
2586	1	2586	38.6754	0.000281772	0.113719
2583	1	2583	38.6305	0.000281936	0.113757
2582	3	7746	38.6156	0.000282428	0.113873
2581	3	7743	38.6006	0.00028292	0.113989
2580	1	2580	38.5856	0.000283084	0.114028
2578	2	5156	38.5557	0.000283411	0.114105
2576	1	2576	38.5258	0.000283575	0.114143
2575	1	2575	38.5109	0.000283739	0.114182
2574	1	2574	38.4959	0.000283903	0.11422
2573	2	5146	38.481	0.000284231	0.114297
2572	1	2572	38.466	0.000284395	0.114336
2571	2	5142	38.451	0.000284723	0.114413
2569	1	2569	38.4211	0.000284887	0.114451
2568	1	2568	38.4062	0.000285051	0.114489
2566	2	5132	38.3763	0.000285378	0.114566
2565	2	5130	38.3613	0.000285706	0.114643
2564	2	5128	38.3464	0.000286034	0.11472
2563	1	2563	38.3314	0.000286198	0.114758
2562	2	5124	38.3164	0.000286526	0.114835
2561	2	5122	38.3015	0.000286854	0.114911
2558	2	5116	38.2566	0.000287181	0.114988
2557	3	7671	38.2417	0.000287673	0.115102
2553	4	10212	38.1818	0.000288329	0.115255
2552	1	2552	38.1669	0.000288493	0.115293
2551	2	5102	38.1519	0.000288821	0.11537
2549	2	5098	38.122	0.000289148	0.115446
2547	3	7641	38.0921	0.00028964	0.11556
2546	3	7638	38.0772	0.000290132	0.115674
2545	2	5090	38.0622	0.00029046	0.11575
2544	2	5088	38.0472	0.000290788	0.115827
2543	1	2543	38.0323	0.000290952	0.115865
2542	1	2542	38.0173	0.000291115	0.115903
2541	2	5082	38.0024	0.000291443	0.115979
2540	3	7620	37.9874	0.000291935	0.116093
2539	1	2539	37.9725	0.000292099	0.116131
2537	2	5074	37.9426	0.000292427	0.116206
2536	3	7608	37.9276	0.000292919	0.11632
2535	1	2535	37.9126	0.000293082	0.116358
2533	1	2533	37.8827	0.000293246	0.116396
2529	3	7587	37.8229	0.000293738	0.116509
2528	3	7584	37.808	0.00029423	0.116623
2527	3	7581	37.793	0.000294722	0.116736
2526	1	2526	37.778	0.000294886	0.116774
2525	1	2525	37.7631	0.000295049	0.116812
2524	1	2524	37.7481	0.000295213	0.11685
2523	3	7569	37.7332	0.000295705	0.116963
2522	2	5044	37.7182	0.000296033	0.117038
2521	2	5042	37.7033	0.000296361	0.117114
2520	4	10080	37.6883	0.000297016	0.117264
2519	2	5038	37.6734	0.000297344	0.11734
2517	2	5034	37.6434	0.000297672	0.117415
2514	2	5028	37.5986	0.000298	0.11749
2513	2	5026	37.5836	0.000298328	0.117565
2512	2	5024	37.5687	0.000298656	0.11764
2511	2	5022	37.5537	0.000298983	0.117716
2510	4	10040	37.5388	0.000299639	0.117866
2509	1	2509	37.5238	0.000299803	0.117903
2508	1	2508	37.5088	0.000299967	0.117941
2507	1	2507	37.4939	0.000300131	0.117978
2506	1	2506	37.4789	0.000300295	0.118016
2505	3	7515	37.464	0.000300787	0.118128
2503	1	2503	37.4341	0.00030095	0.118166
2502	1	2502	37.4191	0.000301114	0.118203
2500	1	2500	37.3892	0.000301278	0.11824
2497	5	12485	37.3443	0.000302098	0.118427
2495	2	4990	37.3144	0.000302426	0.118502
2494	1	2494	37.2995	0.00030259	0.118539
2493	2	4986	37.2845	0.000302917	0.118614
2491	2	4982	37.2546	0.000303245	0.118688
2490	1	2490	37.2396	0.000303409	0.118725
2489	1	2489	37.2247	0.000303573	0.118763
2488	1	2488	37.2097	0.000303737	0.1188
2486	2	4972	37.1798	0.000304065	0.118874
2485	1	2485	37.1649	0.000304229	0.118911
2484	1	2484	37.1499	0.000304393	0.118948
2483	1	2483	37.1349	0.000304557	0.118986
2481	4	9924	37.105	0.000305212	0.119134
2480	1	2480	37.0901	0.000305376	0.119171
2479	2	4958	37.0751	0.000305704	0.119245
2478	1	2478	37.0602	0.000305868	0.119282
2477	1	2477	37.0452	0.000306032	0.119319
2476	1	2476	37.0303	0.000306196	0.119356
2475	1	2475	37.0153	0.00030636	0.119393
2474	1	2474	37.0003	0.000306524	0.11943
2473	1	2473	36.9854	0.000306688	0.119467
2470	2	4940	36.9405	0.000307015	0.119541
2469	2	4938	36.9256	0.000307343	0.119615
2467	3	7401	36.8957	0.000307835	0.119726
2466	1	2466	36.8807	0.000307999	0.119763
2465	1	2465	36.8657	0.000308163	0.1198
2463	3	7389	36.8358	0.000308655	0.11991
2461	1	2461	36.8059	0.000308818	0.119947
2459	1	2459	36.776	0.000308982	0.119984
2456	1	2456	36.7311	0.000309146	0.12002
2455	1	2455	36.7162	0.00030931	0.120057
2454	1	2454	36.7012	0.000309474	0.120094
2453	1	2453	36.6863	0.000309638	0.12013
2452	1	2452	36.6713	0.000309802	0.120167
2451	2	4902	36.6564	0.00031013	0.12024
2450	1	2450	36.6414	0.000310294	0.120277
2449	1	2449	36.6265	0.000310458	0.120314
2448	3	7344	36.6115	0.000310949	0.120424
2445	1	2445	36.5666	0.000311113	0.12046
2444	3	7332	36.5517	0.000311605	0.12057
2443	1	2443	36.5367	0.000311769	0.120606
2442	1	2442	36.5218	0.000311933	0.120643
2441	1	2441	36.5068	0.000312097	0.120679
2439	2	4878	36.4769	0.000312425	0.120752
2437	2	4874	36.447	0.000312752	0.120825
2435	2	4870	36.4171	0.00031308	0.120898
2431	1	2431	36.3573	0.000313244	0.120934
2429	1	2429	36.3273	0.000313408	0.120971
2428	3	7284	36.3124	0.0003139	0.12108
2427	2	4854	36.2974	0.000314228	0.121152
2424	2	4848	36.2526	0.000314556	0.121225
2423	2	4846	36.2376	0.000314883	0.121297
2422	1	2422	36.2227	0.000315047	0.121333
2419	3	7257	36.1778	0.000315539	0.121442
2418	1	2418	36.1628	0.000315703	0.121478
2417	3	7251	36.1479	0.000316195	0.121587
2416	1	2416	36.1329	0.000316359	0.121623
2415	3	7245	36.118	0.00031685	0.121731
2414	1	2414	36.103	0.000317014	0.121767
2413	3	7239	36.0881	0.000317506	0.121875
2412	1	2412	36.0731	0.00031767	0.121912
2410	3	7230	36.0432	0.000318162	0.12202
2409	2	4818	36.0282	0.00031849	0.122092
2408	1	2408	36.0133	0.000318653	0.122128
2407	1	2407	35.9983	0.000318817	0.122164
2406	2	4812	35.9834	0.000319145	0.122236
2405	3	7215	35.9684	0.000319637	0.122344
2403	1	2403	35.9385	0.000319801	0.12238
2402	3	7206	35.9235	0.000320293	0.122487
2401	1	2401	35.9086	0.000320457	0.122523
2400	2	4800	35.8936	0.000320784	0.122595
2399	2	4798	35.8787	0.000321112	0.122667
2397	2	4794	35.8488	0.00032144	0.122738
2396	4	9584	35.8338	0.000322096	0.122882
2394	1	2394	35.8039	0.00032226	0.122918
2392	2	4784	35.774	0.000322587	0.122989
2391	1	2391	35.759	0.000322751	0.123025
2390	3	7170	35.7441	0.000323243	0.123132
2389	1	2389	35.7291	0.000323407	0.123168
2385	2	4770	35.6693	0.000323735	0.123239
2384	2	4768	35.6543	0.000324063	0.123311
2383	1	2383	35.6394	0.000324227	0.123346
2382	1	2382	35.6244	0.00032439	0.123382
2380	2	4760	35.5945	0.000324718	0.123453
2378	3	7134	35.5646	0.00032521	0.12356
2377	2	4754	35.5496	0.000325538	0.123631
2376	1	2376	35.5347	0.000325702	0.123666
2375	1	2375	35.5197	0.000325866	0.123702
2373	1	2373	35.4898	0.00032603	0.123737
2372	3	7116	35.4749	0.000326521	0.123844
2370	1	2370	35.445	0.000326685	0.123879
2369	1	2369	35.43	0.000326849	0.123915
2367	1	2367	35.4001	0.000327013	0.12395
2366	2	4732	35.3851	0.000327341	0.124021
2365	3	7095	35.3702	0.000327833	0.124127
2364	3	7092	35.3552	0.000328324	0.124233
2363	1	2363	35.3403	0.000328488	0.124268
2361	2	4722	35.3104	0.000328816	0.124339
2360	1	2360	35.2954	0.00032898	0.124374
2359	1	2359	35.2804	0.000329144	0.124409
2358	4	9432	35.2655	0.0003298	0.124551
2355	2	4710	35.2206	0.000330128	0.124621
2354	1	2354	35.2057	0.000330291	0.124656
2353	1	2353	35.1907	0.000330455	0.124691
2352	2	4704	35.1758	0.000330783	0.124762
2351	1	2351	35.1608	0.000330947	0.124797
2350	2	4700	35.1458	0.000331275	0.124867
2349	3	7047	35.1309	0.000331767	0.124973
2348	1	2348	35.1159	0.000331931	0.125008
2346	2	4692	35.086	0.000332258	0.125078
2345	2	4690	35.0711	0.000332586	0.125148
2344	1	2344	35.0561	0.00033275	0.125183
2342	1	2342	35.0262	0.000332914	0.125218
2340	1	2340	34.9963	0.000333078	0.125253
2339	5	11695	34.9813	0.000333898	0.125428
2336	1	2336	34.9365	0.000334062	0.125463
2335	1	2335	34.9215	0.000334225	0.125498
2333	1	2333	34.8916	0.000334389	0.125533
2332	2	4664	34.8766	0.000334717	0.125602
2331	3	6993	34.8617	0.000335209	0.125707
2330	2	4660	34.8467	0.000335537	0.125777
2329	1	2329	34.8318	0.000335701	0.125812
2328	3	6984	34.8168	0.000336192	0.125916
2327	1	2327	34.8019	0.000336356	0.125951
2326	1	2326	34.7869	0.00033652	0.125986
2325	2	4650	34.772	0.000336848	0.126055
2324	2	4648	34.757	0.000337176	0.126125
2323	1	2323	34.742	0.00033734	0.126159
2322	1	2322	34.7271	0.000337504	0.126194
2321	1	2321	34.7121	0.000337668	0.126229
2320	1	2320	34.6972	0.000337832	0.126264
2319	1	2319	34.6822	0.000337996	0.126298
2318	2	4636	34.6673	0.000338323	0.126368
2317	3	6951	34.6523	0.000338815	0.126472
2316	3	6948	34.6373	0.000339307	0.126575
2314	2	4628	34.6074	0.000339635	0.126645
2313	2	4626	34.5925	0.000339963	0.126714
2312	1	2312	34.5775	0.000340126	0.126748
2311	1	2311	34.5626	0.00034029	0.126783
2310	4	9240	34.5476	0.000340946	0.126921
2309	2	4618	34.5327	0.000341274	0.12699
2308	1	2308	34.5177	0.000341438	0.127025
2306	4	9224	34.4878	0.000342093	0.127163
2305	2	4610	34.4728	0.000342421	0.127232
2304	5	11520	34.4579	0.000343241	0.127404
2303	2	4606	34.4429	0.000343569	0.127473
2302	1	2302	34.428	0.000343733	0.127507
2301	1	2301	34.413	0.000343897	0.127542
2300	2	4600	34.3981	0.000344224	0.12761
2299	1	2299	34.3831	0.000344388	0.127645
2298	4	9192	34.3681	0.000345044	0.127782
2297	2	4594	34.3532	0.000345372	0.127851
2296	1	2296	34.3382	0.000345536	0.127885
2295	5	11475	34.3233	0.000346355	0.128057
2294	2	4588	34.3083	0.000346683	0.128126
2292	2	4584	34.2784	0.000347011	0.128194
2291	3	6873	34.2635	0.000347503	0.128297
2290	4	9160	34.2485	0.000348158	0.128434
2289	3	6867	34.2335	0.00034865	0.128537
2288	3	6864	34.2186	0.000349142	0.128639
2286	2	4572	34.1887	0.00034947	0.128708
2285	6	13710	34.1737	0.000350453	0.128913
2284	3	6852	34.1588	0.000350945	0.129015
2283	2	4566	34.1438	0.000351273	0.129084
2282	6	13692	34.1289	0.000352256	0.129288
2280	3	6840	34.0989	0.000352748	0.129391
2279	1	2279	34.084	0.000352912	0.129425
2278	2	4556	34.069	0.00035324	0.129493
2277	2	4554	34.0541	0.000353568	0.129561
2276	1	2276	34.0391	0.000353732	0.129595
2274	2	4548	34.0092	0.000354059	0.129663
2273	6	13638	33.9943	0.000355043	0.129867
2272	4	9088	33.9793	0.000355699	0.130003
2271	5	11355	33.9643	0.000356518	0.130173
2270	1	2270	33.9494	0.000356682	0.130207
2269	2	4538	33.9344	0.00035701	0.130274
2267	1	2267	33.9045	0.000357174	0.130308
2266	2	4532	33.8896	0.000357502	0.130376
2265	2	4530	33.8746	0.000357829	0.130444
2264	3	6792	33.8597	0.000358321	0.130545
2263	4	9052	33.8447	0.000358977	0.130681
2262	2	4524	33.8297	0.000359305	0.130749
2260	1	2260	33.7998	0.000359469	0.130782
2259	5	11295	33.7849	0.000360288	0.130951
2258	2	4516	33.7699	0.000360616	0.131019
2257	3	6771	33.755	0.000361108	0.13112
2256	2	4512	33.74	0.000361436	0.131188
2255	5	11275	33.7251	0.000362255	0.131356
2253	3	6759	33.6951	0.000362747	0.131457
2252	2	4504	33.6802	0.000363075	0.131525
2251	1	2251	33.6652	0.000363239	0.131558
2249	2	4498	33.6353	0.000363567	0.131626
2248	5	11240	33.6204	0.000364386	0.131794
2246	1	2246	33.5905	0.00036455	0.131827
2244	3	6732	33.5605	0.000365042	0.131928
2243	1	2243	33.5456	0.000365206	0.131961
2242	2	4484	33.5306	0.000365534	0.132029
2241	3	6723	33.5157	0.000366025	0.132129
2240	2	4480	33.5007	0.000366353	0.132196
2239	2	4478	33.4858	0.000366681	0.132263
2238	1	2238	33.4708	0.000366845	0.132297
2237	1	2237	33.4559	0.000367009	0.13233
2236	3	6708	33.4409	0.0003675	0.13243
2235	3	6705	33.4259	0.000367992	0.132531
2234	2	4468	33.411	0.00036832	0.132597
2233	3	6699	33.396	0.000368812	0.132698
2232	5	11160	33.3811	0.000369631	0.132864
2231	2	4462	33.3661	0.000369959	0.132931
2230	2	4460	33.3512	0.000370287	0.132998
2228	2	4456	33.3213	0.000370615	0.133065
2227	2	4454	33.3063	0.000370943	0.133131
2226	1	2226	33.2913	0.000371107	0.133164
2225	3	6675	33.2764	0.000371598	0.133264
2224	4	8896	33.2614	0.000372254	0.133397
2223	1	2223	33.2465	0.000372418	0.133431
2222	1	2222	33.2315	0.000372582	0.133464
2221	2	4442	33.2166	0.00037291	0.13353
2220	1	2220	33.2016	0.000373074	0.133563
2219	1	2219	33.1866	0.000373238	0.133597
2218	2	4436	33.1717	0.000373565	0.133663
2217	3	6651	33.1567	0.000374057	0.133762
2215	2	4430	33.1268	0.000374385	0.133829
2213	2	4426	33.0969	0.000374713	0.133895
2211	2	4422	33.067	0.000375041	0.133961
2210	1	2210	33.052	0.000375205	0.133994
2209	2	4418	33.0371	0.000375532	0.13406
2208	3	6624	33.0221	0.000376024	0.134159
2206	5	11030	32.9922	0.000376844	0.134324
2205	2	4410	32.9773	0.000377172	0.13439
2204	3	6612	32.9623	0.000377663	0.134489
2202	1	2202	32.9324	0.000377827	0.134522
2201	2	4402	32.9174	0.000378155	0.134588
2200	1	2200	32.9025	0.000378319	0.134621
2199	4	8796	32.8875	0.000378975	0.134752
2198	1	2198	32.8726	0.000379139	0.134785
2197	3	6591	32.8576	0.00037963	0.134884
2196	3	6588	32.8427	0.000380122	0.134982
2195	1	2195	32.8277	0.000380286	0.135015
2194	2	4388	32.8128	0.000380614	0.135081
2193	3	6579	32.7978	0.000381106	0.135179
2192	1	2192	32.7828	0.000381269	0.135212
2191	2	4382	32.7679	0.000381597	0.135277
2190	1	2190	32.7529	0.000381761	0.13531
2189	2	4378	32.738	0.000382089	0.135376
2188	1	2188	32.723	0.000382253	0.135408
2187	3	6561	32.7081	0.000382745	0.135506
2186	2	4372	32.6931	0.000383073	0.135572
2185	2	4370	32.6782	0.0003834	0.135637
2184	2	4368	32.6632	0.000383728	0.135703
2183	1	2183	32.6482	0.000383892	0.135735
2181	1	2181	32.6183	0.000384056	0.135768
2180	5	10900	32.6034	0.000384876	0.135931
2179	1	2179	32.5884	0.00038504	0.135963
2178	1	2178	32.5735	0.000385203	0.135996
2177	5	10885	32.5585	0.000386023	0.136159
2176	1	2176	32.5436	0.000386187	0.136191
2175	5	10875	32.5286	0.000387007	0.136354
2174	3	6522	32.5136	0.000387498	0.136452
2173	3	6519	32.4987	0.00038799	0.136549
2171	3	6513	32.4688	0.000388482	0.136646
2169	2	4338	32.4389	0.00038881	0.136711
2168	1	2168	32.4239	0.000388974	0.136744
2167	1	2167	32.409	0.000389137	0.136776
2165	1	2165	32.379	0.000389301	0.136808
2164	3	6492	32.3641	0.000389793	0.136906
2163	4	8652	32.3491	0.000390449	0.137035
2162	1	2162	32.3342	0.000390613	0.137067
2159	2	4318	32.2893	0.000390941	0.137132
2158	1	2158	32.2744	0.000391104	0.137164
2157	2	4314	32.2594	0.000391432	0.137229
2156	1	2156	32.2444	0.000391596	0.137261
2155	1	2155	32.2295	0.00039176	0.137293
2154	2	4308	32.2145	0.000392088	0.137358
2153	2	4306	32.1996	0.000392416	0.137422
2152	3	6456	32.1846	0.000392908	0.137519
2151	3	6453	32.1697	0.000393399	0.137615
2149	3	6447	32.1398	0.000393891	0.137711
2148	1	2148	32.1248	0.000394055	0.137744
2147	4	8588	32.1098	0.000394711	0.137872
2146	1	2146	32.0949	0.000394875	0.137904
2145	2	4290	32.0799	0.000395202	0.137968
2144	4	8576	32.065	0.000395858	0.138097
2143	1	2143	32.05	0.000396022	0.138129
2141	2	4282	32.0201	0.00039635	0.138193
2140	4	8560	32.0052	0.000397005	0.138321
2139	1	2139	31.9902	0.000397169	0.138353
2138	2	4276	31.9752	0.000397497	0.138417
2137	2	4274	31.9603	0.000397825	0.138481
2136	4	8544	31.9453	0.000398481	0.138608
2135	2	4270	31.9304	0.000398809	0.138672
2134	2	4268	31.9154	0.000399136	0.138736
2133	2	4266	31.9005	0.000399464	0.1388
2131	1	2131	31.8705	0.000399628	0.138832
2130	1	2130	31.8556	0.000399792	0.138864
2129	3	6387	31.8406	0.000400284	0.138959
2128	2	4256	31.8257	0.000400612	0.139023
2127	3	6381	31.8107	0.000401103	0.139118
2126	1	2126	31.7958	0.000401267	0.13915
2125	4	8500	31.7808	0.000401923	0.139277
2124	1	2124	31.7659	0.000402087	0.139309
2121	1	2121	31.721	0.000402251	0.139341
2119	3	6357	31.6911	0.000402743	0.139436
2118	2	4236	31.6761	0.00040307	0.139499
2117	4	8468	31.6612	0.000403726	0.139626
2116	3	6348	31.6462	0.000404218	0.139721
2115	4	8460	31.6313	0.000404873	0.139847
2114	2	4228	31.6163	0.000405201	0.13991
2113	1	2113	31.6013	0.000405365	0.139942
2112	3	6336	31.5864	0.000405857	0.140037
2111	2	4222	31.5714	0.000406185	0.1401
2110	4	8440	31.5565	0.00040684	0.140226
2109	1	2109	31.5415	0.000407004	0.140258
2108	2	4216	31.5266	0.000407332	0.140321
2107	1	2107	31.5116	0.000407496	0.140352
2106	2	4212	31.4967	0.000407824	0.140415
2105	3	6315	31.4817	0.000408316	0.14051
2103	1	2103	31.4518	0.00040848	0.140541
2102	1	2102	31.4368	0.000408644	0.140572
2101	4	8404	31.4219	0.000409299	0.140698
2100	2	4200	31.4069	0.000409627	0.140761
2099	1	2099	31.392	0.000409791	0.140792
2098	2	4196	31.377	0.000410119	0.140855
2097	2	4194	31.3621	0.000410447	0.140918
2096	1	2096	31.3471	0.000410611	0.140949
2095	3	6285	31.3321	0.000411102	0.141043
2094	6	12564	31.3172	0.000412086	0.141231
2093	3	6279	31.3022	0.000412577	0.141325
2091	2	4182	31.2723	0.000412905	0.141388
2090	2	4180	31.2574	0.000413233	0.14145
2089	2	4178	31.2424	0.000413561	0.141513
2088	3	6264	31.2275	0.000414053	0.141606
2087	5	10435	31.2125	0.000414872	0.141762
2086	3	6258	31.1975	0.000415364	0.141856
2085	1	2085	31.1826	0.000415528	0.141887
2084	1	2084	31.1676	0.000415692	0.141918
2083	2	4166	31.1527	0.00041602	0.141981
2082	2	4164	31.1377	0.000416348	0.142043
2081	2	4162	31.1228	0.000416675	0.142105
2080	2	4160	31.1078	0.000417003	0.142167
2079	2	4158	31.0929	0.000417331	0.142229
2076	4	8304	31.048	0.000417987	0.142354
2075	5	10375	31.033	0.000418806	0.142509
2074	1	2074	31.0181	0.00041897	0.14254
2073	2	4146	31.0031	0.000419298	0.142602
2072	4	8288	30.9882	0.000419954	0.142726
2070	5	10350	30.9583	0.000420773	0.142881
2069	3	6207	30.9433	0.000421265	0.142973
2068	1	2068	30.9283	0.000421429	0.143004
2067	3	6201	30.9134	0.000421921	0.143097
2066	2	4132	30.8984	0.000422249	0.143159
2065	2	4130	30.8835	0.000422576	0.143221
2064	2	4128	30.8685	0.000422904	0.143282
2063	5	10315	30.8536	0.000423724	0.143437
2062	2	4124	30.8386	0.000424052	0.143498
2061	1	2061	30.8237	0.000424216	0.143529
2060	1	2060	30.8087	0.000424379	0.14356
2059	2	4118	30.7937	0.000424707	0.143622
2058	3	6174	30.7788	0.000425199	0.143714
2057	3	6171	30.7638	0.000425691	0.143806
2056	1	2056	30.7489	0.000425855	0.143837
2055	2	4110	30.7339	0.000426183	0.143898
2054	5	10270	30.719	0.000427002	0.144052
2053	4	8212	30.704	0.000427658	0.144175
2052	1	2052	30.6891	0.000427822	0.144205
2051	1	2051	30.6741	0.000427986	0.144236
2050	4	8200	30.6591	0.000428641	0.144359
2049	1	2049	30.6442	0.000428805	0.144389
2048	2	4096	30.6292	0.000429133	0.144451
2047	5	10235	30.6143	0.000429953	0.144604
2046	3	6138	30.5993	0.000430444	0.144696
2045	3	6135	30.5844	0.000430936	0.144787
2044	4	8176	30.5694	0.000431592	0.14491
2042	2	4084	30.5395	0.00043192	0.144971
2041	3	6123	30.5245	0.000432411	0.145062
2040	2	4080	30.5096	0.000432739	0.145123
2039	2	4078	30.4946	0.000433067	0.145184
2038	1	2038	30.4797	0.000433231	0.145215
2036	2	4072	30.4498	0.000433559	0.145276
2035	1	2035	30.4348	0.000433723	0.145306
2033	3	6099	30.4049	0.000434214	0.145397
2032	3	6096	30.3899	0.000434706	0.145488
2031	3	6093	30.375	0.000435198	0.14558
2030	2	4060	30.36	0.000435526	0.14564
2029	2	4058	30.3451	0.000435854	0.145701
2028	1	2028	30.3301	0.000436018	0.145731
2027	4	8108	30.3152	0.000436673	0.145853
2026	3	6078	30.3002	0.000437165	0.145943
2025	1	2025	30.2852	0.000437329	0.145974
2023	2	4046	30.2553	0.000437657	0.146034
2022	1	2022	30.2404	0.000437821	0.146065
2021	2	4042	30.2254	0.000438148	0.146125
2020	1	2020	30.2105	0.000438312	0.146155
2019	3	6057	30.1955	0.000438804	0.146246
2018	3	6054	30.1806	0.000439296	0.146336
2017	1	2017	30.1656	0.00043946	0.146366
2016	4	8064	30.1506	0.000440115	0.146487
2015	3	6045	30.1357	0.000440607	0.146577
2014	3	6042	30.1207	0.000441099	0.146668
2013	3	6039	30.1058	0.000441591	0.146758
2012	2	4024	30.0908	0.000441919	0.146818
2011	5	10055	30.0759	0.000442738	0.146969
2010	2	4020	30.0609	0.000443066	0.147029
2009	1	2009	30.046	0.00044323	0.147059
2007	1	2007	30.016	0.000443394	0.147089
2006	2	4012	30.0011	0.000443722	0.147149
2005	1	2005	29.9861	0.000443886	0.147179
2004	4	8016	29.9712	0.000444541	0.147299
2003	2	4006	29.9562	0.000444869	0.147359
2002	2	4004	29.9413	0.000445197	0.147419
2001	6	12006	29.9263	0.00044618	0.147598
2000	3	6000	29.9114	0.000446672	0.147688
1999	1	1999	29.8964	0.000446836	0.147718
1998	1	1998	29.8814	0.000447	0.147748
1997	2	3994	29.8665	0.000447328	0.147807
1996	3	5988	29.8515	0.00044782	0.147897
1995	1	1995	29.8366	0.000447983	0.147927
1994	3	5982	29.8216	0.000448475	0.148016
1993	2	3986	29.8067	0.000448803	0.148076
1992	3	5976	29.7917	0.000449295	0.148165
1991	1	1991	29.7768	0.000449459	0.148195
1990	6	11940	29.7618	0.000450442	0.148374
1989	3	5967	29.7468	0.000450934	0.148463
1988	4	7952	29.7319	0.00045159	0.148582
1987	6	11922	29.7169	0.000452573	0.14876
1986	2	3972	29.702	0.000452901	0.148819
1985	5	9925	29.687	0.000453721	0.148968
1984	3	5952	29.6721	0.000454212	0.149057
1982	1	1982	29.6422	0.000454376	0.149087
1981	5	9905	29.6272	0.000455196	0.149235
1980	2	3960	29.6122	0.000455524	0.149294
1979	3	5937	29.5973	0.000456015	0.149383
1978	6	11868	29.5823	0.000456999	0.14956
1977	2	3954	29.5674	0.000457327	0.149619
1976	2	3952	29.5524	0.000457655	0.149678
1975	3	5925	29.5375	0.000458146	0.149767
1974	2	3948	29.5225	0.000458474	0.149826
1973	5	9865	29.5076	0.000459294	0.149974
1972	3	5916	29.4926	0.000459785	0.150062
1971	2	3942	29.4776	0.000460113	0.150121
1969	3	5907	29.4477	0.000460605	0.150209
1968	1	1968	29.4328	0.000460769	0.150239
1967	5	9835	29.4178	0.000461588	0.150386
1966	7	13762	29.4029	0.000462736	0.150592
1965	2	3930	29.3879	0.000463064	0.150651
1964	4	7856	29.373	0.000463719	0.150768
1963	2	3926	29.358	0.000464047	0.150827
1962	1	1962	29.343	0.000464211	0.150856
1961	3	5883	29.3281	0.000464703	0.150944
1960	1	1960	29.3131	0.000464867	0.150973
1959	3	5877	29.2982	0.000465359	0.151061
1958	6	11748	29.2832	0.000466342	0.151237
1957	2	3914	29.2683	0.00046667	0.151295
1956	3	5868	29.2533	0.000467162	0.151383
1955	1	1955	29.2384	0.000467326	0.151412
1954	3	5862	29.2234	0.000467817	0.1515
1953	4	7812	29.2084	0.000468473	0.151617
1952	3	5856	29.1935	0.000468965	0.151705
1951	2	3902	29.1785	0.000469293	0.151763
1950	2	3900	29.1636	0.00046962	0.151821
1949	1	1949	29.1486	0.000469784	0.15185
1948	2	3896	29.1337	0.000470112	0.151909
1947	2	3894	29.1187	0.00047044	0.151967
1946	1	1946	29.1037	0.000470604	0.151996
1945	1	1945	29.0888	0.000470768	0.152025
1944	5	9720	29.0738	0.000471587	0.15217
1943	5	9715	29.0589	0.000472407	0.152316
1942	2	3884	29.0439	0.000472735	0.152374
1941	6	11646	29.029	0.000473718	0.152548
1940	1	1940	29.014	0.000473882	0.152577
1939	3	5817	28.9991	0.000474374	0.152664
1938	5	9690	28.9841	0.000475194	0.152809
1937	3	5811	28.9691	0.000475685	0.152896
1936	2	3872	28.9542	0.000476013	0.152954
1935	5	9675	28.9392	0.000476833	0.153098
1934	3	5802	28.9243	0.000477324	0.153185
1933	5	9665	28.9093	0.000478144	0.15333
1932	5	9660	28.8944	0.000478964	0.153474
1931	5	9655	28.8794	0.000479783	0.153619
1930	3	5790	28.8645	0.000480275	0.153705
1929	4	7716	28.8495	0.000480931	0.153821
1928	3	5784	28.8345	0.000481422	0.153907
1927	4	7708	28.8196	0.000482078	0.154022
1926	4	7704	28.8046	0.000482734	0.154138
1924	3	5772	28.7747	0.000483225	0.154224
1923	2	3846	28.7598	0.000483553	0.154282
1921	2	3842	28.7299	0.000483881	0.154339
1920	3	5760	28.7149	0.000484373	0.154425
1919	2	3838	28.6999	0.000484701	0.154483
1917	5	9585	28.67	0.00048552	0.154626
1916	4	7664	28.6551	0.000486176	0.15474
1915	1	1915	28.6401	0.00048634	0.154769
1914	2	3828	28.6252	0.000486668	0.154826
1913	1	1913	28.6102	0.000486832	0.154855
1912	3	5736	28.5953	0.000487323	0.154941
1911	4	7644	28.5803	0.000487979	0.155055
1910	3	5730	28.5653	0.000488471	0.155141
1909	2	3818	28.5504	0.000488799	0.155198
1908	4	7632	28.5354	0.000489454	0.155312
1907	1	1907	28.5205	0.000489618	0.155341
1906	1	1906	28.5055	0.000489782	0.155369
1904	4	7616	28.4756	0.000490438	0.155483
1903	1	1903	28.4607	0.000490602	0.155511
1902	2	3804	28.4457	0.00049093	0.155568
1901	3	5703	28.4307	0.000491421	0.155654
1900	2	3800	28.4158	0.000491749	0.15571
1899	4	7596	28.4008	0.000492405	0.155824
1898	4	7592	28.3859	0.00049306	0.155938
1897	6	11382	28.3709	0.000494044	0.156108
1896	2	3792	28.356	0.000494372	0.156165
1895	1	1895	28.341	0.000494536	0.156193
1894	3	5682	28.3261	0.000495027	0.156278
1893	1	1893	28.3111	0.000495191	0.156306
1892	3	5676	28.2961	0.000495683	0.156391
1891	3	5673	28.2812	0.000496175	0.156476
1890	1	1890	28.2662	0.000496339	0.156504
1889	3	5667	28.2513	0.000496831	0.156589
1888	2	3776	28.2363	0.000497158	0.156645
1887	6	11322	28.2214	0.000498142	0.156815
1886	3	5658	28.2064	0.000498634	0.156899
1885	3	5655	28.1915	0.000499125	0.156984
1884	2	3768	28.1765	0.000499453	0.15704
1883	2	3766	28.1615	0.000499781	0.157097
1882	1	1882	28.1466	0.000499945	0.157125
1881	2	3762	28.1316	0.000500273	0.157181
1880	3	5640	28.1167	0.000500765	0.157265
1879	3	5637	28.1017	0.000501256	0.15735
1878	1	1878	28.0868	0.00050142	0.157378
1877	2	3754	28.0718	0.000501748	0.157434
1875	4	7500	28.0419	0.000502404	0.157546
1873	1	1873	28.012	0.000502568	0.157574
1872	4	7488	27.997	0.000503223	0.157686
1871	3	5613	27.9821	0.000503715	0.15777
1870	2	3740	27.9671	0.000504043	0.157826
1869	1	1869	27.9522	0.000504207	0.157854
1868	4	7472	27.9372	0.000504862	0.157966
1867	3	5601	27.9223	0.000505354	0.158049
1866	4	7464	27.9073	0.00050601	0.158161
1865	6	11190	27.8923	0.000506993	0.158328
1864	3	5592	27.8774	0.000507485	0.158412
1863	5	9315	27.8624	0.000508305	0.158551
1862	4	7448	27.8475	0.00050896	0.158663
1861	2	3722	27.8325	0.000509288	0.158718
1860	6	11160	27.8176	0.000510272	0.158885
1859	4	7436	27.8026	0.000510927	0.158996
1858	5	9290	27.7876	0.000511747	0.159135
1857	4	7428	27.7727	0.000512403	0.159247
1856	3	5568	27.7577	0.000512894	0.15933
1855	4	7420	27.7428	0.00051355	0.159441
1854	1	1854	27.7278	0.000513714	0.159468
1853	3	5559	27.7129	0.000514206	0.159552
1852	3	5556	27.6979	0.000514697	0.159635
1851	3	5553	27.683	0.000515189	0.159718
1850	2	3700	27.668	0.000515517	0.159773
1849	2	3698	27.653	0.000515845	0.159828
1848	2	3696	27.6381	0.000516173	0.159884
1847	3	5541	27.6231	0.000516664	0.159967
1846	3	5538	27.6082	0.000517156	0.160049
1845	5	9225	27.5932	0.000517976	0.160187
1844	3	5532	27.5783	0.000518467	0.16027
1843	2	3686	27.5633	0.000518795	0.160325
1842	4	7368	27.5484	0.000519451	0.160435
1841	6	11046	27.5334	0.000520434	0.160601
1840	1	1840	27.5184	0.000520598	0.160628
1839	5	9195	27.5035	0.000521418	0.160766
1838	3	5514	27.4885	0.00052191	0.160848
[truncated: 1,826 more rows]

## Sheet: legend
Supplemental Table S2. Sequence abundance of Piwi-piRNAs in OSC. Piwi-piRNA sequences were binned by sequence abundance. Read count, normalized abundance in parts per million (ppm) and cumulative fractions in columns 2-5.
