# Supplementary material for: Cellular abundance shapes function in piRNA-guided genome defense
Source: HighWire-hosted journal article supplement (doi:10.1101/gr.275478.121), 2021-10-19
Supplement: Supplemental_table_S3.xlsx [file Supplemental_table_S3.xlsx]

## Sheet: Suppl_table_S3
Chromosome	Start	End	Genomic_position	Rank	Strand
chrX	1960552	1966459	chrX:1960552-1966459:+	1	+
chrX	11300878	11314432	chrX:11300878-11314432:+	2	+
chrX	21626065	21641178	chrX:21626065-21641178:+:flam	3	+
chr2R	4929372	4982869	chr2R:4929372-4982869:+	4	+
chrX	11317230	11323598	chrX:11317230-11323598:+	5	+
chr2R	5048189	5058849	chr2R:5048189-5058849:+	6	+
chr2L	22307203	22330417	chr2L:22307203-22330417:+	7	+
chrX	21655074	21662272	chrX:21655074-21662272:+:flam	8	+
chr2R	1559351	1564488	chr2R:1559351-1564488:+	9	+
chr2L	3193550	3204877	chr2L:3193550-3204877:+	10	+
chrX	21666937	21674497	chrX:21666937-21674497:+:flam	11	+
chr3L	24106821	24114187	chr3L:24106821-24114187:+	12	+
chr3L	19122841	19149942	chr3L:19122841-19149942:+	13	+
chrX	22942798	22952648	chrX:22942798-22952648:+	14	+
chr3R	1333761	1338931	chr3R:1333761-1338931:+	15	+
chr2R	5608638	5622037	chr2R:5608638-5622037:+	16	+
chrX	21711854	21718433	chrX:21711854-21718433:+:flam	17	+
chrX	21552984	21595651	chrX:21552984-21595651:+	18	+
chr2L	22395115	22403334	chr2L:22395115-22403334:+	19	+
chr2R	992421	1010078	chr2R:992421-1010078:+	20	+
chrX	21492268	21536616	chrX:21492268-21536616:+	21	+
chr4	1238269	1256439	chr4:1238269-1256439:+	22	+
chrX	21758664	21772752	chrX:21758664-21772752:+:flam	23	+
chr3R	28770369	28778885	chr3R:28770369-28778885:+	24	+
chrX	22773242	22812056	chrX:22773242-22812056:+:flam	25	+
chr3R	603530	609689	chr3R:603530-609689:+	26	+
chrX	21730868	21741786	chrX:21730868-21741786:+:flam	27	+
chr2R	4122265	4141819	chr2R:4122265-4141819:+	28	+
chr2R	4315785	4322575	chr2R:4315785-4322575:+	29	+
chr2R	4000689	4009140	chr2R:4000689-4009140:+	30	+
chrX	11195418	11201286	chrX:11195418-11201286:+	31	+
chr3L	23523215	23538876	chr3L:23523215-23538876:+	32	+
chr3L	25597445	25606344	chr3L:25597445-25606344:+	33	+
chr3L	20325196	20387219	chr3L:20325196-20387219:+	34	+
chrX	21915102	21923519	chrX:21915102-21923519:+:flam	35	+
chrX	22252729	22259530	chrX:22252729-22259530:+:flam	36	+
chrX	21925964	21955228	chrX:21925964-21955228:+:flam	37	+
chrX	5067868	5097286	chrX:5067868-5097286:-	38	-
chrX	22088489	22098545	chrX:22088489-22098545:+:flam	39	+
chrX	21906030	21914065	chrX:21906030-21914065:+:flam	40	+
chr3R	17038643	17098124	chr3R:17038643-17098124:+	41	+
chr2R	7438397	7460290	chr2R:7438397-7460290:+	42	+
chrX	22112501	22127231	chrX:22112501-22127231:+:flam	43	+
chr3R	4153579	4159298	chr3R:4153579-4159298:+	44	+
chr3L	23880535	23896371	chr3L:23880535-23896371:+	45	+
chr3R	10083337	10136907	chr3R:10083337-10136907:+	46	+
chr3L	24491481	24497826	chr3L:24491481-24497826:+	47	+
chrX	21778236	21798850	chrX:21778236-21798850:+:flam	48	+
chr3L	20469988	20477566	chr3L:20469988-20477566:+	49	+
chr3L	5305680	5320379	chr3L:5305680-5320379:+	50	+
chrX	22078116	22084978	chrX:22078116-22084978:+:flam	51	+
chrX	17160035	17195635	chrX:17160035-17195635:+	52	+
chr2L	23127087	23137179	chr2L:23127087-23137179:-	53	-
chr3L	25902999	25915190	chr3L:25902999-25915190:-	54	-
chr2L	22222644	22258900	chr2L:22222644-22258900:+	55	+
chrX	3355491	3415069	chrX:3355491-3415069:+	56	+
chr3L	588927	658074	chr3L:588927-658074:+	57	+
chr4	82078	151945	chr4:82078-151945:+	58	+
chr3L	23068624	23081913	chr3L:23068624-23081913:+	59	+
chrX	12596047	12617311	chrX:12596047-12617311:+	60	+
chr3R	22453222	22467233	chr3R:22453222-22467233:+	61	+
chr3R	3843134	3871328	chr3R:3843134-3871328:+	62	+
chr2R	15993386	16004410	chr2R:15993386-16004410:-	63	-
chr3R	3792241	3800910	chr3R:3792241-3800910:+	64	+
chr2L	21405538	21414203	chr2L:21405538-21414203:+	65	+
chr2R	20060093	20070179	chr2R:20060093-20070179:+	66	+
chr2R	7518523	7525099	chr2R:7518523-7525099:+	67	+
chr3R	12977346	13009711	chr3R:12977346-13009711:+	68	+
chr2R	6447068	6452250	chr2R:6447068-6452250:+	69	+
chrX	22016522	22024027	chrX:22016522-22024027:+:flam	70	+
chr3R	14741779	14978384	chr3R:14741779-14978384:+	71	+
chr2R	17698354	17705167	chr2R:17698354-17705167:+	72	+
chr3L	24385725	24396769	chr3L:24385725-24396769:+	73	+
chr2L	391793	423360	chr2L:391793-423360:+	74	+
chr3L	14619620	14721241	chr3L:14619620-14721241:+	75	+
chr2L	52561	124654	chr2L:52561-124654:+	76	+
chr2R	6739425	6758427	chr2R:6739425-6758427:+	77	+
chr3R	12704471	12735041	chr3R:12704471-12735041:-	78	-
chr2R	12868923	12904496	chr2R:12868923-12904496:+	79	+
chr3R	18872361	18930095	chr3R:18872361-18930095:+	80	+
chr2R	14871713	14880113	chr2R:14871713-14880113:+	81	+
chr3R	12439629	12458666	chr3R:12439629-12458666:+	82	+
chr3L	8525256	8541469	chr3L:8525256-8541469:+	83	+
chrX	21956260	21965123	chrX:21956260-21965123:+:flam	84	+
chr2R	20256807	20272730	chr2R:20256807-20272730:+	85	+
chr2L	295124	306773	chr2L:295124-306773:+	86	+
chr2R	4089445	4095634	chr2R:4089445-4095634:+	87	+
chr4	444637	456741	chr4:444637-456741:+	88	+
chrX	14558747	14636423	chrX:14558747-14636423:+	89	+
chr2R	6419788	6440047	chr2R:6419788-6440047:+	90	+
chr2L	13203870	13214068	chr2L:13203870-13214068:+	91	+
chr3L	27357287	27387694	chr3L:27357287-27387694:+	92	+
chrX	15857575	15878832	chrX:15857575-15878832:+	93	+
chr2R	5090672	5103567	chr2R:5090672-5103567:+	94	+
chr3L	3192753	3198060	chr3L:3192753-3198060:+	95	+
chr3L	23588364	23620499	chr3L:23588364-23620499:+	96	+
chr2R	11885320	11915058	chr2R:11885320-11915058:+	97	+
chrX	5896972	5927141	chrX:5896972-5927141:+	98	+
chr2R	13772051	13826909	chr2R:13772051-13826909:+	99	+
chr3R	31724162	31769503	chr3R:31724162-31769503:+	100	+
chr3R	3740931	3762280	chr3R:3740931-3762280:+	101	+
chr3R	16434644	16517255	chr3R:16434644-16517255:-	102	-
chrX	2720459	2730041	chrX:2720459-2730041:+	103	+
chr2R	7671231	7698899	chr2R:7671231-7698899:-	104	-
chrX	6037553	6051190	chrX:6037553-6051190:+	105	+
chr3L	14728587	14772837	chr3L:14728587-14772837:+	106	+
chr2R	12345004	12426965	chr2R:12345004-12426965:+	107	+
chr3R	5672194	5715081	chr3R:5672194-5715081:+	108	+
chrX	19744433	19771208	chrX:19744433-19771208:+	109	+
chr2R	17559034	17606631	chr2R:17559034-17606631:+	110	+
chr2R	18808644	18824150	chr2R:18808644-18824150:+	111	+
chrX	5932300	5959536	chrX:5932300-5959536:+	112	+
chrX	18510756	18537284	chrX:18510756-18537284:+	113	+
chr3L	18818454	18830447	chr3L:18818454-18830447:+	114	+
chr3L	8395050	8447315	chr3L:8395050-8447315:+	115	+
chr3L	24972624	24986316	chr3L:24972624-24986316:+	116	+
chr2R	9699057	9726651	chr2R:9699057-9726651:+	117	+
chr3R	17441800	17487346	chr3R:17441800-17487346:+	118	+
chrX	6533074	6562865	chrX:6533074-6562865:+	119	+
chr2R	21021016	21065258	chr2R:21021016-21065258:+	120	+
chrX	19729601	19735753	chrX:19729601-19735753:+	121	+
chr3R	15241160	15252273	chr3R:15241160-15252273:+	122	+
chr2R	23870289	23888986	chr2R:23870289-23888986:+	123	+
chr3R	14056956	14095899	chr3R:14056956-14095899:+	124	+
chr3R	25882057	25908219	chr3R:25882057-25908219:+	125	+
chr2L	6338838	6347995	chr2L:6338838-6347995:+	126	+
chr3L	9369554	9379757	chr3L:9369554-9379757:-	127	-
chr2L	5354038	5417370	chr2L:5354038-5417370:+	128	+
chr3L	23099547	23107954	chr3L:23099547-23107954:+	129	+
chr2L	9495052	9544063	chr2L:9495052-9544063:+	130	+
chr2L	20757764	20778053	chr2L:20757764-20778053:+	131	+
chr2L	5288170	5318581	chr2L:5288170-5318581:+	132	+
chr2L	10214824	10254669	chr2L:10214824-10254669:+	133	+
chr2R	25011806	25063963	chr2R:25011806-25063963:+	134	+
chr3L	16807988	16861706	chr3L:16807988-16861706:+	135	+
chrX	15746654	15780379	chrX:15746654-15780379:+	136	+
chr3R	16613047	16652599	chr3R:16613047-16652599:+	137	+
chr3L	11513135	11564209	chr3L:11513135-11564209:-	138	-
chr3L	22255509	22285471	chr3L:22255509-22285471:+	139	+
chr2R	12915997	12930642	chr2R:12915997-12930642:+	140	+
chr2R	23537149	23643923	chr2R:23537149-23643923:+	141	+
chr3R	21521089	21528846	chr3R:21521089-21528846:+	142	+
chr3R	13605556	13668619	chr3R:13605556-13668619:+	143	+
chr3R	4380189	4408348	chr3R:4380189-4408348:+	144	+
chr2L	22505237	22511776	chr2L:22505237-22511776:+	145	+
chr2L	8382926	8389848	chr2L:8382926-8389848:+	146	+
chr2R	21179123	21197749	chr2R:21179123-21197749:+	147	+
chr2L	20747503	20755953	chr2L:20747503-20755953:+	148	+
chr3R	12627101	12638034	chr3R:12627101-12638034:+	149	+
chr3L	27321345	27356237	chr3L:27321345-27356237:+	150	+
chr2R	8645796	8707931	chr2R:8645796-8707931:+	151	+
chr3L	224103	260672	chr3L:224103-260672:+	152	+
chr2R	6666004	6673821	chr2R:6666004-6673821:-	153	-
chrX	15310433	15331317	chrX:15310433-15331317:+	154	+
chr2L	5890011	5905496	chr2L:5890011-5905496:+	155	+
chr3R	11210200	11228215	chr3R:11210200-11228215:+	156	+
chr3R	9673191	9685325	chr3R:9673191-9685325:-	157	-
chr2L	10056994	10066963	chr2L:10056994-10066963:+	158	+
chr3L	24813236	24821393	chr3L:24813236-24821393:-	159	-
chr2R	4219418	4225050	chr2R:4219418-4225050:-	160	-
chrX	8559080	8612084	chrX:8559080-8612084:+	161	+
chr2L	4212841	4253171	chr2L:4212841-4253171:-	162	-
chrX	22701760	22771557	chrX:22701760-22771557:+:flam	163	+
chr2R	9144019	9151127	chr2R:9144019-9151127:+	164	+
chr2L	1686443	1712434	chr2L:1686443-1712434:+	165	+
chr2L	6920708	6971140	chr2L:6920708-6971140:+	166	+
chr3L	22871181	22882791	chr3L:22871181-22882791:+	167	+
chr3L	24372924	24382214	chr3L:24372924-24382214:+	168	+
chr2L	5085391	5173361	chr2L:5085391-5173361:+	169	+
chr3L	24346800	24369115	chr3L:24346800-24369115:+	170	+
chr2L	21355103	21399137	chr2L:21355103-21399137:+	171	+
chr2R	13960687	13974390	chr2R:13960687-13974390:+	172	+
chr3R	16045102	16066691	chr3R:16045102-16066691:+	173	+
chr2R	15530508	15578556	chr2R:15530508-15578556:+	174	+
chr2L	5980669	5990965	chr2L:5980669-5990965:+	175	+
chr4	943980	979682	chr4:943980-979682:+	176	+
chrX	11087514	11095725	chrX:11087514-11095725:+	177	+
chr3L	9888984	9896960	chr3L:9888984-9896960:+	178	+
chr3L	13485762	13512268	chr3L:13485762-13512268:+	179	+
chr2R	4594607	4641673	chr2R:4594607-4641673:+	180	+
chr3L	22938941	22989909	chr3L:22938941-22989909:+	181	+
chr3L	15587977	15616148	chr3L:15587977-15616148:+	182	+
chrX	14718542	14779631	chrX:14718542-14779631:+	183	+
chr3L	19793832	19812367	chr3L:19793832-19812367:+	184	+
chr3L	1970834	1977704	chr3L:1970834-1977704:+	185	+
chr3L	22095155	22101034	chr3L:22095155-22101034:+	186	+
chr3L	27252009	27298680	chr3L:27252009-27298680:+	187	+
chr2R	7589928	7597760	chr2R:7589928-7597760:+	188	+
chr3L	3149411	3158411	chr3L:3149411-3158411:+	189	+
chr2R	9113417	9124075	chr2R:9113417-9124075:+	190	+
chr2L	2854495	2881653	chr2L:2854495-2881653:+	191	+
chr3L	16748491	16785891	chr3L:16748491-16785891:+	192	+
chr3L	15556715	15586947	chr3L:15556715-15586947:+	193	+
chr2L	10314797	10324890	chr2L:10314797-10324890:+	194	+
chr2R	24068567	24082058	chr2R:24068567-24082058:+	195	+
chr3R	6405741	6417775	chr3R:6405741-6417775:+	196	+
chr3R	20908751	20985317	chr3R:20908751-20985317:+	197	+
chrX	19685404	19713041	chrX:19685404-19713041:-	198	-
chr2R	15420684	15491935	chr2R:15420684-15491935:+	199	+
chr3L	16088334	16105130	chr3L:16088334-16105130:+	200	+
chr3R	4615086	4656495	chr3R:4615086-4656495:+	201	+
chr2L	2357709	2401981	chr2L:2357709-2401981:+	202	+
chr3L	8711362	8730587	chr3L:8711362-8730587:+	203	+
chr2L	18617308	18633668	chr2L:18617308-18633668:+	204	+
chr2R	17241705	17429590	chr2R:17241705-17429590:+	205	+
chrX	11870672	11889284	chrX:11870672-11889284:-	206	-
chrX	22137698	22142729	chrX:22137698-22142729:+:flam	207	+
chr3L	23698173	23704053	chr3L:23698173-23704053:+	208	+
chr3R	6419094	6510101	chr3R:6419094-6510101:+	209	+
chr3L	9468007	9495437	chr3L:9468007-9495437:+	210	+
chr2R	8098731	8104116	chr2R:8098731-8104116:+	211	+
chr2L	8071853	8114631	chr2L:8071853-8114631:+	212	+
chr3L	4853410	4901130	chr3L:4853410-4901130:+	213	+
chr3L	21171572	21221429	chr3L:21171572-21221429:+	214	+
chr2L	12924435	12933883	chr2L:12924435-12933883:-	215	-
chr3L	8023927	8125277	chr3L:8023927-8125277:+	216	+
chrX	6854443	6927685	chrX:6854443-6927685:+	217	+
chr4	569825	580921	chr4:569825-580921:+	218	+
chr2L	19154408	19193239	chr2L:19154408-19193239:+	219	+
chr3L	27389050	27400899	chr3L:27389050-27400899:+	220	+
chrX	21323022	21331618	chrX:21323022-21331618:+	221	+
chrX	21349738	21394896	chrX:21349738-21394896:+	222	+
chrX	4936471	4988536	chrX:4936471-4988536:+	223	+
chr2R	16178839	16199585	chr2R:16178839-16199585:+	224	+
chr3L	12693350	12711817	chr3L:12693350-12711817:+	225	+
chr2R	8417490	8470916	chr2R:8417490-8470916:+	226	+
chr2L	12743983	12781850	chr2L:12743983-12781850:+	227	+
chr3L	27207149	27213224	chr3L:27207149-27213224:+	228	+
chr3R	15839320	15849688	chr3R:15839320-15849688:+	229	+
chr3R	8104854	8146271	chr3R:8104854-8146271:+	230	+
chr2L	1941057	1946213	chr2L:1941057-1946213:+	231	+
chrX	19491757	19533078	chrX:19491757-19533078:+	232	+
chr3R	24582775	24641909	chr3R:24582775-24641909:+	233	+
chr3R	20772655	20825726	chr3R:20772655-20825726:+	234	+
chr2L	22938226	22943485	chr2L:22938226-22943485:+	235	+
chr2L	21100993	21150503	chr2L:21100993-21150503:+	236	+
chr3R	29761786	29815049	chr3R:29761786-29815049:+	237	+
chr3R	27151667	27163602	chr3R:27151667-27163602:+	238	+
chr2R	5981788	6023880	chr2R:5981788-6023880:+	239	+
chr2L	13244649	13305051	chr2L:13244649-13305051:+	240	+
chr2L	10386489	10433306	chr2L:10386489-10433306:+	241	+
chr2R	18412028	18435039	chr2R:18412028-18435039:+	242	+
chr3L	23738053	23756817	chr3L:23738053-23756817:+	243	+
chrX	9247473	9259845	chrX:9247473-9259845:+	244	+
chr3L	14786322	14819173	chr3L:14786322-14819173:+	245	+
chr3L	3160073	3174069	chr3L:3160073-3174069:+	246	+
chrX	1366580	1381353	chrX:1366580-1381353:+	247	+
chr2R	19357245	19367267	chr2R:19357245-19367267:+	248	+
chrX	3128854	3178520	chrX:3128854-3178520:+	249	+
chr3R	12925352	12976341	chr3R:12925352-12976341:+	250	+
chrX	11346911	11422647	chrX:11346911-11422647:+	251	+
chr2L	20676216	20687482	chr2L:20676216-20687482:+	252	+
chr3L	4192269	4248461	chr3L:4192269-4248461:+	253	+
chrX	15958983	16001257	chrX:15958983-16001257:+	254	+
chr3R	17600729	17610530	chr3R:17600729-17610530:+	255	+
chr2L	13779883	13819940	chr2L:13779883-13819940:+	256	+
chr2R	19452515	19495754	chr2R:19452515-19495754:+	257	+
chr3L	24028528	24043187	chr3L:24028528-24043187:+	258	+
chr2L	18638395	18704606	chr2L:18638395-18704606:+	259	+
chr3R	15287420	15310411	chr3R:15287420-15310411:+	260	+
chr3L	18622668	18691287	chr3L:18622668-18691287:+	261	+
chr3R	9659899	9676907	chr3R:9659899-9676907:+	262	+
chrX	11161071	11184294	chrX:11161071-11184294:+	263	+
chr3L	2631776	2650310	chr3L:2631776-2650310:+	264	+
chrX	10905492	10928955	chrX:10905492-10928955:+	265	+
chrX	16640949	16685866	chrX:16640949-16685866:+	266	+
chr3L	1567806	1603898	chr3L:1567806-1603898:+	267	+
chrX	20593984	20673085	chrX:20593984-20673085:+	268	+
chrX	21017276	21052679	chrX:21017276-21052679:+	269	+
chr3R	7989214	8011382	chr3R:7989214-8011382:+	270	+
chr3L	27410537	27424952	chr3L:27410537-27424952:+	271	+
chrX	16333450	16340717	chrX:16333450-16340717:+	272	+
chr3L	20303010	20318812	chr3L:20303010-20318812:+	273	+
chr3L	3461325	3468109	chr3L:3461325-3468109:+	274	+
chrX	1382394	1400774	chrX:1382394-1400774:+	275	+
chr3R	32052355	32059489	chr3R:32052355-32059489:+	276	+
chr3L	8965957	8973304	chr3L:8965957-8973304:+	277	+
chr3L	1676512	1759201	chr3L:1676512-1759201:+	278	+
chr3R	5784826	5816510	chr3R:5784826-5816510:+	279	+
chr3L	5435473	5457144	chr3L:5435473-5457144:+	280	+
chrX	19444832	19488530	chrX:19444832-19488530:+	281	+
chrX	16941529	16972673	chrX:16941529-16972673:+	282	+
chr3R	23976435	24037639	chr3R:23976435-24037639:-	283	-
chr2R	24750498	24758008	chr2R:24750498-24758008:+	284	+
chr3R	24253233	24315202	chr3R:24253233-24315202:+	285	+
chrX	492533	523322	chrX:492533-523322:+	286	+
chrX	17701098	17708347	chrX:17701098-17708347:+	287	+
chr3R	10880307	10957830	chr3R:10880307-10957830:+	288	+
chr2R	12589280	12625544	chr2R:12589280-12625544:+	289	+
chr3L	23275820	23289291	chr3L:23275820-23289291:+	290	+
chr2L	6998597	7066109	chr2L:6998597-7066109:+	291	+
chrX	7908988	7918995	chrX:7908988-7918995:+	292	+
chr3L	12146583	12161027	chr3L:12146583-12161027:+	293	+
chr2L	20734900	20740302	chr2L:20734900-20740302:+	294	+
chr3L	11108611	11129615	chr3L:11108611-11129615:-	295	-
chr3R	6167095	6175034	chr3R:6167095-6175034:+	296	+
chr2L	5613467	5795189	chr2L:5613467-5795189:+	297	+
chrX	3186135	3218527	chrX:3186135-3218527:+	298	+
chr3R	24829852	24856938	chr3R:24829852-24856938:+	299	+
chr3L	22744998	22761724	chr3L:22744998-22761724:+	300	+
chr2R	13990542	14093268	chr2R:13990542-14093268:+	301	+
chr4	607380	640470	chr4:607380-640470:+	302	+
chr3L	13165329	13221202	chr3L:13165329-13221202:+	303	+
chrX	19358423	19438657	chrX:19358423-19438657:+	304	+
chr3L	129466	218349	chr3L:129466-218349:+	305	+
chr3R	12085641	12173597	chr3R:12085641-12173597:+	306	+
chr3L	3811258	3834710	chr3L:3811258-3834710:+	307	+
chr3R	15922195	16012149	chr3R:15922195-16012149:+	308	+
chr3R	8719606	8741010	chr3R:8719606-8741010:+	309	+
chr2R	23099994	23141841	chr2R:23099994-23141841:+	310	+
chr3R	19501303	19653972	chr3R:19501303-19653972:+	311	+
chr2L	2495069	2546679	chr2L:2495069-2546679:+	312	+
chr3R	9311832	9392254	chr3R:9311832-9392254:+	313	+
chr3R	6145504	6158561	chr3R:6145504-6158561:+	314	+
chr2R	17451433	17485993	chr2R:17451433-17485993:+	315	+
chr2L	16526652	16711249	chr2L:16526652-16711249:+	316	+
chr2R	12272667	12282072	chr2R:12272667-12282072:+	317	+
chrX	8059902	8071033	chrX:8059902-8071033:+	318	+
chr2L	16487105	16511989	chr2L:16487105-16511989:+	319	+
chrX	6217712	6236919	chrX:6217712-6236919:+	320	+
chr2R	16123539	16172301	chr2R:16123539-16172301:+	321	+
chr3L	6193519	6203783	chr3L:6193519-6203783:+	322	+
chrX	19297214	19357041	chrX:19297214-19357041:+	323	+
chr3R	5467602	5490270	chr3R:5467602-5490270:+	324	+
chr4	359497	387790	chr4:359497-387790:+	325	+
chr2L	21310582	21323405	chr2L:21310582-21323405:+	326	+
chrX	3421201	3493147	chrX:3421201-3493147:+	327	+
chr2L	21237257	21301821	chr2L:21237257-21301821:+	328	+
chr2L	16712524	16766234	chr2L:16712524-16766234:+	329	+
chr2R	12986340	13059371	chr2R:12986340-13059371:+	330	+
chrX	13782526	13819446	chrX:13782526-13819446:+	331	+
chr3R	26806278	26845072	chr3R:26806278-26845072:+	332	+
chr2L	17824729	17912030	chr2L:17824729-17912030:+	333	+
chr2R	4012581	4031951	chr2R:4012581-4031951:+	334	+
chrX	1818424	1858478	chrX:1818424-1858478:+	335	+
chr2R	8174111	8229284	chr2R:8174111-8229284:+	336	+
chrX	11816920	11843608	chrX:11816920-11843608:+	337	+
chr3L	27153238	27180787	chr3L:27153238-27180787:+	338	+
chr2R	21502168	21566975	chr2R:21502168-21566975:+	339	+
chr3R	22126735	22239543	chr3R:22126735-22239543:+	340	+
chr3R	20272987	20421823	chr3R:20272987-20421823:+	341	+
chr2R	4823298	4830750	chr2R:4823298-4830750:+	342	+
chr3R	21856712	21913916	chr3R:21856712-21913916:+	343	+
chr3L	8449900	8479872	chr3L:8449900-8479872:+	344	+
chr3R	13060450	13135876	chr3R:13060450-13135876:+	345	+
chr2R	4846739	4858644	chr2R:4846739-4858644:+	346	+
chr3R	22367541	22386566	chr3R:22367541-22386566:+	347	+
chr2L	14297981	14466056	chr2L:14297981-14466056:+	348	+
chr2R	14278300	14356234	chr2R:14278300-14356234:+	349	+
chr2R	1590582	1604721	chr2R:1590582-1604721:+	350	+
chr3R	18759242	18871339	chr3R:18759242-18871339:+	351	+
chrX	6608480	6656214	chrX:6608480-6656214:+	352	+
chr3R	8239545	8268679	chr3R:8239545-8268679:+	353	+
chrX	683240	762012	chrX:683240-762012:+	354	+
chr2R	22660484	22674322	chr2R:22660484-22674322:+	355	+
chr2R	2492658	2499039	chr2R:2492658-2499039:-	356	-
chr2L	424826	454118	chr2L:424826-454118:+	357	+
chr3R	23710422	23771174	chr3R:23710422-23771174:+	358	+
chr3L	10417355	10644289	chr3L:10417355-10644289:+	359	+
chr2L	1880053	1893168	chr2L:1880053-1893168:+	360	+
chr2L	22991871	23019155	chr2L:22991871-23019155:+	361	+
chr2R	19089847	19246393	chr2R:19089847-19246393:+	362	+
chr2R	10786949	10846608	chr2R:10786949-10846608:+	363	+
chrX	8409276	8435431	chrX:8409276-8435431:+	364	+
chr3R	31668714	31691562	chr3R:31668714-31691562:+	365	+
chr2L	17953411	18051924	chr2L:17953411-18051924:+	366	+
chr3L	8128116	8197158	chr3L:8128116-8197158:+	367	+
chr3L	13034087	13059385	chr3L:13034087-13059385:+	368	+
chrX	15345178	15355242	chrX:15345178-15355242:+	369	+
chr2R	24862592	24890365	chr2R:24862592-24890365:+	370	+
chr2R	8950246	8969537	chr2R:8950246-8969537:+	371	+
chrX	13563853	13619257	chrX:13563853-13619257:+	372	+
chr3R	26117412	26151454	chr3R:26117412-26151454:+	373	+
chr2L	12286849	12432986	chr2L:12286849-12432986:+	374	+
chr2R	23645065	23683598	chr2R:23645065-23683598:+	375	+
chrX	7995579	8031470	chrX:7995579-8031470:+	376	+
chr2L	23173106	23182749	chr2L:23173106-23182749:+	377	+
chrX	10366589	10395330	chrX:10366589-10395330:+	378	+
chr3L	3515869	3601352	chr3L:3515869-3601352:+	379	+
chr2L	19122264	19147400	chr2L:19122264-19147400:+	380	+
chr2R	13750087	13759964	chr2R:13750087-13759964:+	381	+
chrX	10396564	10466181	chrX:10396564-10466181:+	382	+
chr3R	30324918	30375488	chr3R:30324918-30375488:+	383	+
chr2L	13550143	13560456	chr2L:13550143-13560456:+	384	+
chr3L	21379326	21474391	chr3L:21379326-21474391:+	385	+
chr3R	26221775	26365944	chr3R:26221775-26365944:+	386	+
chr2R	18688186	18717099	chr2R:18688186-18717099:+	387	+
chr3L	9547238	9576645	chr3L:9547238-9576645:+	388	+
chrX	11648275	11731270	chrX:11648275-11731270:+	389	+
chr2L	19583547	19652616	chr2L:19583547-19652616:+	390	+
chr2L	20797058	20820801	chr2L:20797058-20820801:+	391	+
chr2R	8316900	8398195	chr2R:8316900-8398195:+	392	+
chr2L	13565217	13599226	chr2L:13565217-13599226:+	393	+
chr3R	30277934	30317366	chr3R:30277934-30317366:+	394	+
chrX	3226802	3354487	chrX:3226802-3354487:+	395	+
chr4	562911	568628	chr4:562911-568628:+	396	+
chr3R	30750252	30840470	chr3R:30750252-30840470:+	397	+
chrX	3760958	3789523	chrX:3760958-3789523:+	398	+
chr2L	2993169	3054274	chr2L:2993169-3054274:+	399	+
chr2L	1573579	1678969	chr2L:1573579-1678969:+	400	+
chr2L	3055555	3073063	chr2L:3055555-3073063:+	401	+
chr2L	9123740	9218023	chr2L:9123740-9218023:+	402	+
chr3R	26849268	26954067	chr3R:26849268-26954067:+	403	+
chr3L	7986799	8019755	chr3L:7986799-8019755:+	404	+
chrX	2640427	2664350	chrX:2640427-2664350:+	405	+
chr2R	8600427	8635044	chr2R:8600427-8635044:+	406	+
chr2L	1900887	1939820	chr2L:1900887-1939820:+	407	+
chr3R	25516044	25609447	chr3R:25516044-25609447:+	408	+
chr3R	15387111	15447688	chr3R:15387111-15447688:+	409	+
chr3R	9411241	9495873	chr3R:9411241-9495873:+	410	+
chr2R	14498551	14594047	chr2R:14498551-14594047:+	411	+
chrX	11488886	11535095	chrX:11488886-11535095:+	412	+
chr2L	4019024	4066095	chr2L:4019024-4066095:+	413	+
chrX	14163232	14229277	chrX:14163232-14229277:+	414	+
chr3L	8544743	8576646	chr3L:8544743-8576646:+	415	+
chrX	19866240	19907775	chrX:19866240-19907775:+	416	+
chr3L	10654858	10718594	chr3L:10654858-10718594:+	417	+
chr4	225781	247484	chr4:225781-247484:+	418	+
chr3R	5719304	5747089	chr3R:5719304-5747089:+	419	+
chr3R	25246267	25263825	chr3R:25246267-25263825:+	420	+
chr3L	21031849	21082817	chr3L:21031849-21082817:+	421	+
chr3R	21155745	21232295	chr3R:21155745-21232295:+	422	+
chr2L	159046	221955	chr2L:159046-221955:+	423	+
chr3R	4657634	4714180	chr3R:4657634-4714180:+	424	+
chr2L	19816774	19990830	chr2L:19816774-19990830:+	425	+
chr2L	13600371	13646677	chr2L:13600371-13646677:+	426	+
chr3R	20248853	20266550	chr3R:20248853-20266550:+	427	+
chr3L	540998	585083	chr3L:540998-585083:+	428	+
chr3L	4531089	4607434	chr3L:4531089-4607434:+	429	+
chr3L	6432283	6638606	chr3L:6432283-6638606:+	430	+
chr3L	9864319	9873937	chr3L:9864319-9873937:+	431	+
chrX	12629932	12689911	chrX:12629932-12689911:+	432	+
chr2L	4068854	4149523	chr2L:4068854-4149523:+	433	+
chr2R	11169281	11228001	chr2R:11169281-11228001:+	434	+
chr3R	29009975	29118424	chr3R:29009975-29118424:+	435	+
chr2R	7150712	7196599	chr2R:7150712-7196599:+	436	+
chr3R	30086316	30127345	chr3R:30086316-30127345:+	437	+
chr2L	13862248	13952796	chr2L:13862248-13952796:+	438	+
chr2L	2885330	2934277	chr2L:2885330-2934277:+	439	+
chr3L	16446188	16512825	chr3L:16446188-16512825:+	440	+
chrX	1773760	1796718	chrX:1773760-1796718:+	441	+
chr3R	22750951	22797649	chr3R:22750951-22797649:+	442	+
chrX	8513921	8556680	chrX:8513921-8556680:+	443	+
chr2L	14469022	14616888	chr2L:14469022-14616888:+	444	+
chrX	13620323	13666608	chrX:13620323-13666608:+	445	+
chr3R	30056424	30084908	chr3R:30056424-30084908:+	446	+
chr3L	2371807	2447539	chr3L:2371807-2447539:+	447	+
chr2R	21863458	22004358	chr2R:21863458-22004358:+	448	+
chr2L	19674006	19703535	chr2L:19674006-19703535:+	449	+
chr3L	21840731	21956977	chr3L:21840731-21956977:+	450	+
chr3L	16417729	16443891	chr3L:16417729-16443891:+	451	+
chrX	12203822	12324584	chrX:12203822-12324584:+	452	+

## Sheet: legend
Supplemental Table S3. PiRNA cluster coordinates and rank by mean sequence abundance. Coordinates for the top 450 piRNA clusters in Drosophila Ovarian Somatic Sheath Cells (OSC).
