# Supplementary material for: Cellular abundance shapes function in piRNA-guided genome defense
Source: HighWire-hosted journal article supplement (doi:10.1101/gr.275478.121), 2021-10-19
Supplement: Supplemental_Table_S4.xlsx [file Supplemental_Table_S4.xlsx]

## Sheet: Suppl_Table_S4
Sensor_name	piR-genereting_region	Chromosome	Start	End	length(nt)	piRNAs_absolute_numbers	piRNAs_per_million(ppm)	% of red cells	% of green cells	% of yellow cells
flam(as)-460	flamenco (lincRNA:flam)	Chr X	21635062	21635521	460	1836216	8460.98	71.3	0.5	28.2
flam(as)-230b	flamenco (lincRNA:flam)	Chr X	21635292	21635521	230	969521	4444.48	49.8	3.6	46.6
flam(as)-230a	flamenco (lincRNA:flam)	Chr X	21635062	21635291	230	740468	3431.53	49.2	2.2	48.6
flam(as)-100	flamenco (lincRNA:flam)	Chr X	21635292	21635391	100	410131	1900.66	2.1	22.2	75.7
tj(as)-230	traffic jam	Chr 2L	19466747	19466976	230	214586	994.45	14.4	9	76.6
path(as)-230	pathetic	Chr 3L	9495281	9495510	230	31577	146.332	10.5	6	83.5
cg17514(as)-230	cg17514	Chr 3L	27970220	27970449	230	24333	112.761	33	2	65
cycB3(as)-230a	cyclin B3	Chr 3R	24868353	24868582	230	1338	6.20065	0.9	15.3	83.8
cycB3(as)-230b	cyclin B3	Chr 3R	24870599	24870828	230	25	0.115857	2.5	16	81.5

## Sheet: legend
Supplemental Table S4. Sensor constructs and anti-sense piRNAs. Piwi-piRNA sensor in OSC: complementary piRNAs (read counts and normalized abundance in ppm), fraction of cells positive for GFP (green), mCherry (red) or both (yellow) as fraction of all transfected cells in percent (%) based on quantification by flow cytometry.
