# Supplementary material for: Cellular abundance shapes function in piRNA-guided genome defense
Source: HighWire-hosted journal article supplement (doi:10.1101/gr.275478.121), 2021-10-19
Supplement: Supplemental_table_S5.xlsx [file Supplemental_table_S5.xlsx]

## Sheet: Suppl_table_S5
Oligonucleotide	Source	Sequence (5’ > 3’)	Libraries
Calibrator 1	Integrated DNA Technologies	/5phos/CUC AUG GUU GUA AGU CCC GGU AAU CU	Calibrated total small RNA (tsRNA) libraries
Calibrator 2	Integrated DNA Technologies	/5phos/UCA UGG UUG UAA GUC CCG GUA AUC UA	Calibrated total small RNA (tsRNA) libraries
Calibrator 3	Integrated DNA Technologies	/5phos/AUG GUU GUA AGU CCC GGU AAU CUA CG	Calibrated total small RNA (tsRNA) libraries
Calibrator 4	Integrated DNA Technologies	/5phos/GGU UGU AAG UCC CGG UAA UCU ACG UC	Calibrated total small RNA (tsRNA) libraries
5’ hybrid adaptor (34 nt long DNA-RNA hybrid)	Integrated DNA Technologies	5’-GTTCAGAGTTCTACAGTCCGACGArUrCrNrNrNrNrNrNrNrN-3’	Calibrated total small RNA (tsRNA) libraries
3’ adaptor (29 nt DNA with 5’ adenylation and 3’ fluorophore (NHS ester Alexa Fluor 660))	MultiplexDX	5’-rAppNNTGACTGTGGAATTCTCGGGTGCCAAGG-3’	Calibrated total small RNA (tsRNA) libraries
RT primer	Integrated DNA Technologies	5’-GCCTTGGCACCCGAGAATTCCA-3’	Calibrated total small RNA (tsRNA) libraries
PCR forward primer	Integrated DNA Technologies	5’- AATGATACGGCGACCACCGAGATCTACACGTTCAGAGTTCTACAGTCCGA -3’	Calibrated total small RNA (tsRNA) libraries
PCR Reverse Index Primer (RPI12)	Integrated DNA Technologies	5’-CAAGCAGAAGACGGCATACGAGATTACAAGGTGACTGGAGTTCCTTGGCACCCGAGAATTCCA-3’	Calibrated total small RNA (tsRNA) libraries
PCR Reverse Index Primer (RPI13)	Integrated DNA Technologies	5'- CAAGCAGAAGACGGCATACGAGATTTGACTGTGACTGGAGTTCCTTGGCACCCGAGAATTCCA-3’	Calibrated total small RNA (tsRNA) libraries
PCR Reverse Index Primer (RPI14)	Integrated DNA Technologies	5’-CAAGCAGAAGACGGCATACGAGATGGAACTGTGACTGGAGTTCCTTGGCACCCGAGAATTCCA-3’	Calibrated total small RNA (tsRNA) libraries
PCR Reverse Index Primer (RPI16)	Integrated DNA Technologies	5'-CAAGCAGAAGACGGCATACGAGATGGACGGGTGACTGGAGTTCCTTGGCACCCGAGAATTCCA-3’	Calibrated total small RNA (tsRNA) libraries
PCR Reverse Index Primer (RPI36)	Integrated DNA Technologies	5’-CAAGCAGAAGACGGCATACGAGATTGTTGGGTGACTGGAGTTCCTTGGCACCCGAGAATTCCA-3’	Calibrated total small RNA (tsRNA) libraries
PCR Reverse Index Primer (RPI37)	Integrated DNA Technologies	5'-CAAGCAGAAGACGGCATACGAGATATTCCGGTGACTGGAGTTCCTTGGCACCCGAGAATTCCA-3’	Calibrated total small RNA (tsRNA) libraries
PCR Reverse Index Primer (RPI38)	Integrated DNA Technologies	5'-CAAGCAGAAGACGGCATACGAGATAGCTAGGTGACTGGAGTTCCTTGGCACCCGAGAATTCCA-3’	Calibrated total small RNA (tsRNA) libraries
PCR Reverse Index Primer (RPI40)	Integrated DNA Technologies	5'-CAAGCAGAAGACGGCATACGAGATTCTGAGGTGACTGGAGTTCCTTGGCACCCGAGAATTCCA-3’	Calibrated total small RNA (tsRNA) libraries
DNA Carrier (11 nt)	Integrated DNA Technologies	5’-TCG AAG TAT TC-3’	Calibrated total small RNA (tsRNA) libraries
5’ hybrid adaptor (34 nt long DNA-RNA hybrid)	Integrated DNA Technologies	5’-GTTCAGAGTTCTACAGTCCGACGArUrCrNrNrNrNrNrNrNrN-3’	Piwi-IP (piRNA) libraries
3’ Index adaptor 29.04 (29 nt DNA with 5’ adenylation and 3’ Aminohexyl blocking group)	Integrated DNA Technologies	5’-NNGCGATATGGAATTCTCGGGTGCCAAGG-3’	Piwi-IP (piRNA) libraries
3’ Index adaptor 29.31 (29 nt DNA with 5’ adenylation and 3’ Aminohexyl blocking group)	Integrated DNA Technologies	5’- NNTAGCGATGGAATTCTCGGGTGCCAAGG-3’	Piwi-IP (piRNA) libraries
3’ Index adaptor 29.32 (29 nt DNA with 5’ adenylation and 3’ Aminohexyl blocking group)	Integrated DNA Technologies	5’- NNCTGTAGTGGAATTCTCGGGTGCCAAGG-3’	Piwi-IP (piRNA) libraries
3’ Index adaptor 29.33 (29 nt DNA with 5’ adenylation and 3’ Aminohexyl blocking group)	Integrated DNA Technologies	5’- NNTAGTCGTGGAATTCTCGGGTGCCAAGG-3’	Piwi-IP (piRNA) libraries
3’ Index adaptor 29.34 (29 nt DNA with 5’ adenylation and 3’ Aminohexyl blocking group)	Integrated DNA Technologies	5’- NNAGTGTCTGGAATTCTCGGGTGCCAAGG-3’	Piwi-IP (piRNA) libraries
3’ Index adaptor 29.35 (29 nt DNA with 5’ adenylation and 3’ Aminohexyl blocking group)	Integrated DNA Technologies	5’- NNATCGACTGGAATTCTCGGGTGCCAAGG-3’	Piwi-IP (piRNA) libraries
RT primer	Integrated DNA Technologies	5’-GCCTTGGCACCCGAGAATTCCA-3’	Piwi-IP (piRNA) libraries
PCR forward primer	Integrated DNA Technologies	5’- AATGATACGGCGACCACCGAGATCTACACGTTCAGAGTTCTACAGTCCGA-3’	Piwi-IP (piRNA) libraries
PCR Reverse Index Primer (RPI25)	Integrated DNA Technologies	5'-CAAGCAGAAGACGGCATACGAGATATCAGTGTGACTGGAGTTCCTTGGCACCCGAGAATTCCA-3’	Piwi-IP (piRNA) libraries

## Sheet: legend
Supplemental Table S5. Oligonucleotides used for experiments. Detailed in Experimental Procedures.
