# Supplementary material for: Cellular abundance shapes function in piRNA-guided genome defense
Source: HighWire-hosted journal article supplement (doi:10.1101/gr.275478.121), 2021-10-19
Supplement: Supplemental_table_S6.xlsx [file Supplemental_table_S6.xlsx]

## Sheet: Zamore_lab_calibrator_counts
Calibrators_counts_extracted_from_Gainetdinov_I,Colpan_C_et_al,2018_Mol_Cell_71(5):775–790						Calculating_ratio_of_non-methylated/methylated
							SRR7760317_read_counts											Non-me/me_from_all_libraries(high_molar_ratio_only)
			SRR7760317_Primary_Spermatocytes_Rep2				30_nt_calibrator		26_nt_calibrator		22_nt_calibrator		mean		ratio_mean_Non-me/me			3.37396
3'_end	molar_ratio	Length_(nt)	Calibrator	read_count		final_molar_ratio	3'-OH	3'-2'-O-me	3'-OH	3'-2'-O-me	3'-OH	3'-2'-O-me	3'-OH	3'-2'-O-me				3.51421
3'-2'-O-me	0.01	30	1_TGCTAGTCTGTTATCGACCTGACCTCATAG	21		0.01	16	21	12	6	2	0	10	9	1.11111			2.72256
3'-2'-O-me	0.1	30	2_TGCTAGTCTGTTCGATACCTGACCTCATAG	304		0.1	462	304	215	91	36	41	237.667	145.333	1.63532			3.58556
3'-2'-O-me	1	30	3_TGCTAGTCTGTTGTCACGAAGACCTCATAG	3270		1	15195	3270	13153	5244	3158	824	10502	3112.67	3.37396			2.57431
3'-2'-O-me	0.01	26	4_TGCTAGTCTTATCGACCTCCTCATAG	6														3.2443
3'-2'-O-me	0.1	26	5_TGCTAGTCTTCGATACCTCCTCATAG	91														3.52801
3'-2'-O-me	1	26	6_TGCTAGTCTTGTCACGAACCTCATAG	5244
3'-2'-O-me	0.01	22	7_TGCTAGTTATCGACCTTCATAG	0													median_(kcorr.):	3.37396
3'-2'-O-me	0.1	22	8_TGCTAGTTCGATACCTTCATAG	41
3'-2'-O-me	1	22	9_TGCTAGTTGTCACGAATCATAG	824
3'-OH	0.01	30	10_TGCTAGTCTGTGATCGACAAGACCTCATAG	16
3'-OH	0.1	30	11_TGCTAGTCTGTTACGTGCAAGACCTCATAG	462
3'-OH	1	30	12_TGCTAGTCTGTTACTGCGAAGACCTCATAG	15195
3'-OH	0.01	26	13_TGCTAGTCTGATCGACAACCTCATAG	12
3'-OH	0.1	26	14_TGCTAGTCTTACGTGCAACCTCATAG	215
3'-OH	1	26	15_TGCTAGTCTTACTGCGAACCTCATAG	13153
3'-OH	0.01	22	16_TGCTAGTGATCGACAATCATAG	2
3'-OH	0.1	22	17_TGCTAGTTACGTGCAATCATAG	36
3'-OH	1	22	18_TGCTAGTTACTGCGAATCATAG	3158
							SRR7760319_read_counts
			SRR7760319_Primary_Spermatocytes_Rep1				30_nt_calibrator		26_nt_calibrator		22_nt_calibrator		mean		ratio_mean_Non-me/me
3'_end	molar_ratio	Length_(nt)	Calibrator	read_count		final_molar_ratio	3'-OH	3'-2'-O-me	3'-OH	3'-2'-O-me	3'-OH	3'-2'-O-me	3'-OH	3'-2'-O-me
3'-2'-O-me	0.01	30	1_TGCTAGTCTGTTATCGACCTGACCTCATAG	98		0.01	42	98	40	4	3	12	28.3333	38	0.745614
3'-2'-O-me	0.1	30	2_TGCTAGTCTGTTCGATACCTGACCTCATAG	514		0.1	509	514	400	321	20	38	309.667	291	1.06415
3'-2'-O-me	1	30	3_TGCTAGTCTGTTGTCACGAAGACCTCATAG	4414		1	24100	4414	17979	7715	5159	1313	15746	4480.67	3.51421
3'-2'-O-me	0.01	26	4_TGCTAGTCTTATCGACCTCCTCATAG	4
3'-2'-O-me	0.1	26	5_TGCTAGTCTTCGATACCTCCTCATAG	321
3'-2'-O-me	1	26	6_TGCTAGTCTTGTCACGAACCTCATAG	7715
3'-2'-O-me	0.01	22	7_TGCTAGTTATCGACCTTCATAG	12
3'-2'-O-me	0.1	22	8_TGCTAGTTCGATACCTTCATAG	38
3'-2'-O-me	1	22	9_TGCTAGTTGTCACGAATCATAG	1313
3'-OH	0.01	30	10_TGCTAGTCTGTGATCGACAAGACCTCATAG	42
3'-OH	0.1	30	11_TGCTAGTCTGTTACGTGCAAGACCTCATAG	509
3'-OH	1	30	12_TGCTAGTCTGTTACTGCGAAGACCTCATAG	24100
3'-OH	0.01	26	13_TGCTAGTCTGATCGACAACCTCATAG	40
3'-OH	0.1	26	14_TGCTAGTCTTACGTGCAACCTCATAG	400
3'-OH	1	26	15_TGCTAGTCTTACTGCGAACCTCATAG	17979
3'-OH	0.01	22	16_TGCTAGTGATCGACAATCATAG	3
3'-OH	0.1	22	17_TGCTAGTTACGTGCAATCATAG	20
3'-OH	1	22	18_TGCTAGTTACTGCGAATCATAG	5159
							SRR7760321_read_counts
			SRR7760321_WT_Spermatogonia_Rep2				30_nt_calibrator		26_nt_calibrator		22_nt_calibrator		mean		ratio_mean_Non-me/me
3'_end	molar_ratio	Length_(nt)	Calibrator	read_count		final_molar_ratio	3'-OH	3'-2'-O-me	3'-OH	3'-2'-O-me	3'-OH	3'-2'-O-me	3'-OH	3'-2'-O-me
3'-2'-O-me	0.01	30	1_TGCTAGTCTGTTATCGACCTGACCTCATAG	120		0.01	203	120	45	17	59	18	102.333	51.6667	1.98065
3'-2'-O-me	0.1	30	2_TGCTAGTCTGTTCGATACCTGACCTCATAG	3387		0.1	2370	3387	1802	1656	80	291	1417.33	1778	0.79715
3'-2'-O-me	1	30	3_TGCTAGTCTGTTGTCACGAAGACCTCATAG	21445		1	57078	21445	72272	28812	25422	6591	51590.7	18949.3	2.72256
3'-2'-O-me	0.01	26	4_TGCTAGTCTTATCGACCTCCTCATAG	17
3'-2'-O-me	0.1	26	5_TGCTAGTCTTCGATACCTCCTCATAG	1656
3'-2'-O-me	1	26	6_TGCTAGTCTTGTCACGAACCTCATAG	28812
3'-2'-O-me	0.01	22	7_TGCTAGTTATCGACCTTCATAG	18
3'-2'-O-me	0.1	22	8_TGCTAGTTCGATACCTTCATAG	291
3'-2'-O-me	1	22	9_TGCTAGTTGTCACGAATCATAG	6591
3'-OH	0.01	30	10_TGCTAGTCTGTGATCGACAAGACCTCATAG	203
3'-OH	0.1	30	11_TGCTAGTCTGTTACGTGCAAGACCTCATAG	2370
3'-OH	1	30	12_TGCTAGTCTGTTACTGCGAAGACCTCATAG	57078
3'-OH	0.01	26	13_TGCTAGTCTGATCGACAACCTCATAG	45
3'-OH	0.1	26	14_TGCTAGTCTTACGTGCAACCTCATAG	1802
3'-OH	1	26	15_TGCTAGTCTTACTGCGAACCTCATAG	72272
3'-OH	0.01	22	16_TGCTAGTGATCGACAATCATAG	59
3'-OH	0.1	22	17_TGCTAGTTACGTGCAATCATAG	80
3'-OH	1	22	18_TGCTAGTTACTGCGAATCATAG	25422
							SRR7760326_read_counts
			SRR7760326_2ry_spermatocytes_Rep1				30_nt_calibrator		26_nt_calibrator		22_nt_calibrator		mean		ratio_mean_Non-me/me
3'_end	molar_ratio	Length_(nt)	Calibrator	read_count		final_molar_ratio	3'-OH	3'-2'-O-me	3'-OH	3'-2'-O-me	3'-OH	3'-2'-O-me	3'-OH	3'-2'-O-me
3'-2'-O-me	0.01	30	1_TGCTAGTCTGTTATCGACCTGACCTCATAG	59		0.01	93	59	31	16	1	4	41.6667	26.3333	1.58228
3'-2'-O-me	0.1	30	2_TGCTAGTCTGTTCGATACCTGACCTCATAG	578		0.1	861	578	415	325	23	53	433	318.667	1.35879
3'-2'-O-me	1	30	3_TGCTAGTCTGTTGTCACGAAGACCTCATAG	3527		1	20084	3527	13731	5915	3568	984	12461	3475.33	3.58556
3'-2'-O-me	0.01	26	4_TGCTAGTCTTATCGACCTCCTCATAG	16
3'-2'-O-me	0.1	26	5_TGCTAGTCTTCGATACCTCCTCATAG	325
3'-2'-O-me	1	26	6_TGCTAGTCTTGTCACGAACCTCATAG	5915
3'-2'-O-me	0.01	22	7_TGCTAGTTATCGACCTTCATAG	4
3'-2'-O-me	0.1	22	8_TGCTAGTTCGATACCTTCATAG	53
3'-2'-O-me	1	22	9_TGCTAGTTGTCACGAATCATAG	984
3'-OH	0.01	30	10_TGCTAGTCTGTGATCGACAAGACCTCATAG	93
3'-OH	0.1	30	11_TGCTAGTCTGTTACGTGCAAGACCTCATAG	861
3'-OH	1	30	12_TGCTAGTCTGTTACTGCGAAGACCTCATAG	20084
3'-OH	0.01	26	13_TGCTAGTCTGATCGACAACCTCATAG	31
3'-OH	0.1	26	14_TGCTAGTCTTACGTGCAACCTCATAG	415
3'-OH	1	26	15_TGCTAGTCTTACTGCGAACCTCATAG	13731
3'-OH	0.01	22	16_TGCTAGTGATCGACAATCATAG	1
3'-OH	0.1	22	17_TGCTAGTTACGTGCAATCATAG	23
3'-OH	1	22	18_TGCTAGTTACTGCGAATCATAG	3568
							SRR7760323_read_counts
			SRR7760323_WT_Spermatogonia_Rep1				30_nt_calibrator		26_nt_calibrator		22_nt_calibrator		mean		ratio_mean_Non-me/me
3'_end	molar_ratio	Length_(nt)	Calibrator	read_count		final_molar_ratio	3'-OH	3'-2'-O-me	3'-OH	3'-2'-O-me	3'-OH	3'-2'-O-me	3'-OH	3'-2'-O-me
3'-2'-O-me	0.01	30	1_TGCTAGTCTGTTATCGACCTGACCTCATAG	82		0.01	173	82	318	12	13	15	168	36.3333	4.62385
3'-2'-O-me	0.1	30	2_TGCTAGTCTGTTCGATACCTGACCTCATAG	1492		0.1	3639	1492	3010	639	96	353	2248.33	828	2.71538
3'-2'-O-me	1	30	3_TGCTAGTCTGTTGTCACGAAGACCTCATAG	19451		1	68519	19451	47274	26412	15121	4991	43638	16951.3	2.57431
3'-2'-O-me	0.01	26	4_TGCTAGTCTTATCGACCTCCTCATAG	12
3'-2'-O-me	0.1	26	5_TGCTAGTCTTCGATACCTCCTCATAG	639
3'-2'-O-me	1	26	6_TGCTAGTCTTGTCACGAACCTCATAG	26412
3'-2'-O-me	0.01	22	7_TGCTAGTTATCGACCTTCATAG	15
3'-2'-O-me	0.1	22	8_TGCTAGTTCGATACCTTCATAG	353
3'-2'-O-me	1	22	9_TGCTAGTTGTCACGAATCATAG	4991
3'-OH	0.01	30	10_TGCTAGTCTGTGATCGACAAGACCTCATAG	173
3'-OH	0.1	30	11_TGCTAGTCTGTTACGTGCAAGACCTCATAG	3639
3'-OH	1	30	12_TGCTAGTCTGTTACTGCGAAGACCTCATAG	68519
3'-OH	0.01	26	13_TGCTAGTCTGATCGACAACCTCATAG	318
3'-OH	0.1	26	14_TGCTAGTCTTACGTGCAACCTCATAG	3010
3'-OH	1	26	15_TGCTAGTCTTACTGCGAACCTCATAG	47274
3'-OH	0.01	22	16_TGCTAGTGATCGACAATCATAG	13
3'-OH	0.1	22	17_TGCTAGTTACGTGCAATCATAG	96
3'-OH	1	22	18_TGCTAGTTACTGCGAATCATAG	25121
							SRR7760377_read_counts
			SRR7760377_2ry_spermatocytes_Rep2				30_nt_calibrator		26_nt_calibrator		22_nt_calibrator		mean		ratio_mean_Non-me/me
3'_end	molar_ratio	Length_(nt)	Calibrator	read_count		final_molar_ratio	3'-OH	3'-2'-O-me	3'-OH	3'-2'-O-me	3'-OH	3'-2'-O-me	3'-OH	3'-2'-O-me
3'-2'-O-me	0.01	30	1_TGCTAGTCTGTTATCGACCTGACCTCATAG	70		0.01	63	70	30	1	4	20	32.3333	30.3333	1.06593
3'-2'-O-me	0.1	30	2_TGCTAGTCTGTTCGATACCTGACCTCATAG	390		0.1	718	390	242	204	22	37	327.333	210.333	1.55626
3'-2'-O-me	1	30	3_TGCTAGTCTGTTGTCACGAAGACCTCATAG	4233		1	23838	4233	15087	7557	4023	1448	14316	4412.67	3.2443
3'-2'-O-me	0.01	26	4_TGCTAGTCTTATCGACCTCCTCATAG	1
3'-2'-O-me	0.1	26	5_TGCTAGTCTTCGATACCTCCTCATAG	204
3'-2'-O-me	1	26	6_TGCTAGTCTTGTCACGAACCTCATAG	7557
3'-2'-O-me	0.01	22	7_TGCTAGTTATCGACCTTCATAG	20
3'-2'-O-me	0.1	22	8_TGCTAGTTCGATACCTTCATAG	37
3'-2'-O-me	1	22	9_TGCTAGTTGTCACGAATCATAG	1448
3'-OH	0.01	30	10_TGCTAGTCTGTGATCGACAAGACCTCATAG	63
3'-OH	0.1	30	11_TGCTAGTCTGTTACGTGCAAGACCTCATAG	718
3'-OH	1	30	12_TGCTAGTCTGTTACTGCGAAGACCTCATAG	23838
3'-OH	0.01	26	13_TGCTAGTCTGATCGACAACCTCATAG	30
3'-OH	0.1	26	14_TGCTAGTCTTACGTGCAACCTCATAG	242
3'-OH	1	26	15_TGCTAGTCTTACTGCGAACCTCATAG	15087
3'-OH	0.01	22	16_TGCTAGTGATCGACAATCATAG	4
3'-OH	0.1	22	17_TGCTAGTTACGTGCAATCATAG	22
3'-OH	1	22	18_TGCTAGTTACTGCGAATCATAG	4023
							SRR7760373_read_counts
			SRR7760373_Round_Spermatids_Rep2				30_nt_calibrator		26_nt_calibrator		22_nt_calibrator		mean		ratio_mean_Non-me/me
3'_end	molar_ratio	Length_(nt)	Calibrator	read_count		final_molar_ratio	3'-OH	3'-2'-O-me	3'-OH	3'-2'-O-me	3'-OH	3'-2'-O-me	3'-OH	3'-2'-O-me
3'-2'-O-me	0.01	30	1_TGCTAGTCTGTTATCGACCTGACCTCATAG	121		0.01	19	121	127	1	1	13	49	45	1.08889
3'-2'-O-me	0.1	30	2_TGCTAGTCTGTTCGATACCTGACCTCATAG	731		0.1	715	731	425	204	19	266	386.333	400.333	0.965029
3'-2'-O-me	1	30	3_TGCTAGTCTGTTGTCACGAAGACCTCATAG	6059		1	26835	6059	22466	8204	5489	1267	18263.3	5176.67	3.52801
3'-2'-O-me	0.01	26	4_TGCTAGTCTTATCGACCTCCTCATAG	1
3'-2'-O-me	0.1	26	5_TGCTAGTCTTCGATACCTCCTCATAG	204
3'-2'-O-me	1	26	6_TGCTAGTCTTGTCACGAACCTCATAG	8204
3'-2'-O-me	0.01	22	7_TGCTAGTTATCGACCTTCATAG	13
3'-2'-O-me	0.1	22	8_TGCTAGTTCGATACCTTCATAG	266
3'-2'-O-me	1	22	9_TGCTAGTTGTCACGAATCATAG	1267
3'-OH	0.01	30	10_TGCTAGTCTGTGATCGACAAGACCTCATAG	19
3'-OH	0.1	30	11_TGCTAGTCTGTTACGTGCAAGACCTCATAG	715
3'-OH	1	30	12_TGCTAGTCTGTTACTGCGAAGACCTCATAG	26835
3'-OH	0.01	26	13_TGCTAGTCTGATCGACAACCTCATAG	127
3'-OH	0.1	26	14_TGCTAGTCTTACGTGCAACCTCATAG	425
3'-OH	1	26	15_TGCTAGTCTTACTGCGAACCTCATAG	22466
3'-OH	0.01	22	16_TGCTAGTGATCGACAATCATAG	1
3'-OH	0.1	22	17_TGCTAGTTACGTGCAATCATAG	19
3'-OH	1	22	18_TGCTAGTTACTGCGAATCATAG	5489

## Sheet: legend
Supplemental Table S6. Estimation of the correction factor (kcorr) for 3’-2’-O-methylated RNAs (piRNAs). The correction factor was calculated based on publicy available data that contain a large set of non-modified and 3’ 2’-O methylated oligonucleotides reference oligonucleotides (SRA accession number: PRJNA421205) (Gainetdinov et al. 2018)
