# Supplementary material for: Cellular abundance shapes function in piRNA-guided genome defense
Source: HighWire-hosted journal article supplement (doi:10.1101/gr.275478.121), 2021-10-19
Supplement: Supplemental_table_S7.xlsx [file Supplemental_table_S7.xlsx]

## Sheet: Small_RNAs_Quantification
			tsRNA_1M_S1_RPI12		tsRNA_1M_S2_RPI13		tsRNA_1M_S3_RPI14		tsRNA_1M_S4_RPI16		tsRNA_1M_S5_RPI36		tsRNA_1M_S6_RPI37		tsRNA_1M_S7_RPI38		tsRNA_1M_S8_RPI40
fmol/1x106cells:	Molecules/cell:	Calibrator:	Total_Counts:	Estimated_No_of_cells:	Total_Counts:	Estimated_No_of_cells:	Total_Counts:	Estimated_No_of_cells:	Total_Counts:	Estimated_No_of_cells:	Total_Counts:	Estimated_No_of_cells:	Total_Counts:	Estimated_No_of_cells:	Total_Counts:	Estimated_No_of_cells:	Total_Counts:	Estimated_No_of_cells:
0.5_fmol	301	CTCATGGTTGTAAGTCCCGGTAATCT	10947	36.3688	6933	23.0332	10137	33.6777	7051	23.4252	12174	40.4452	11690	38.8372	15288	50.7907	11191	37.1794
5_fmol	3011	TCATGGTTGTAAGTCCCGGTAATCTA	91580	30.4151	61345	20.3736	85126	28.2717	54570	18.1235	116769	38.7808	85167	28.2853	135324	44.9432	104043	34.5543
5_fmol	3011	ATGGTTGTAAGTCCCGGTAATCTACG	158126	52.5161	120671	40.0767	147811	49.0903	112068	37.2195	178521	59.2896	161858	53.7556	204417	67.8901	153698	51.0455
0.5_fmol	301	GGTTGTAAGTCCCGGTAATCTACGTC	23003	76.4219	17757	58.9934	22023	73.1661	15743	52.3023	26450	87.8738	24527	81.485	31526	104.738	21811	72.4618
				Median_No_of_cells:		Median_No_of_cells:		Median_No_of_cells:		Median_No_of_cells:		Median_No_of_cells:		Median_No_of_cells:		Median_No_of_cells:		Median_No_of_cells:
				44.4424		31.555		41.384		30.3224		49.8674		46.2964		59.3404		44.1125
				reads/cell:		reads/cell:		reads/cell:		reads/cell:		reads/cell:		reads/cell:		reads/cell:		reads/cell:
		miRNAs	1373384	30902.5	582005	18444.2	526885	12731.6	878348	28967	1829822	36693.8	797036	17215.9	1309674	22070.5	389926	8839.36
		piRNAs(24-29nt)	7740290	174164	7118992	225606	8431990	203750	4499244	148380	8800944	176487	9066402	195834	10682272	180017	7049150	159800
		Final_numbers_used_in_Fig.1C	Final_numbers_used_in_Fig.1C
piRNA_counts/cell	kcorr (3'-2'-O-me):	corrected_piRNAs/cell(x3.4)	miRNAs/cell
174164	3.4	592159	30902.5
225606	3.4	767061	18444.2
203750	3.4	692749	12731.6
148380	3.4	504493	28967
176487	3.4	600056	36693.8
195834	3.4	665835	17215.9
180017	3.4	612057	22070.5
159800	3.4	543318	8839.36
median		606057	20257.3
75th_percentile		672564	29450.9

## Sheet: legend
Supplemental Table S7. Counts and calculations to estimate the number of miRNAs and piRNAs in an average Drosophila ovarian somatic sheath cell (OSC).
